# Supplementary material
Source: PubMed Central journal article supplement (PMC6309908)
Supplement: NIHMS1509397-supplement-2.pdf [file NIHMS1509397-supplement-2.pdf]

# Norbornane-based Cationic Antimicrobial Peptidomimetics Targeting the Bacterial Membrane

Shane M. Hickey,<sup>a\*</sup> Trent D. Ashton,<sup>b,c</sup> Gareth Boer,<sup>d</sup> Christie A. Bader,<sup>a</sup> Michael Thomas,<sup>e</sup> Alysha G. Elliott,<sup>f</sup> Carsten Schmuck,<sup>g</sup> Heidi Y. Yu,<sup>h</sup> Jian Li,<sup>h</sup> Roger L. Nation,<sup>h</sup> Matthew A. Cooper,<sup>f</sup> Sally E. Plush,<sup>a</sup> Douglas A. Brooks,<sup>a</sup> and Frederick M. Pfeffer<sup>d\*</sup>

<sup>a</sup>*Cancer Research Institute, School of Pharmacy and Medical Sciences, University of South Australia, Adelaide, SA, 5000, Australia.*

<sup>b</sup>*The Walter and Eliza Hall Institute of Medical Research, Parkville, 3052, Australia,*

<sup>c</sup>*Department of Medical Biology, The University of Melbourne, Parkville 3010, Australia*

<sup>d</sup>*Centre for Chemistry and Biotechnology, School of Life and Environmental Sciences, Deakin University, Waurn Ponds, Victoria, 3216, Australia,*

<sup>e</sup>*Research School of Chemistry, The Australian National University, Acton, ACT, 2601, Australia,*

<sup>f</sup>*Institute for Molecular Bioscience, The University of Queensland, Brisbane, Queensland, 4072, Australia,*

<sup>g</sup>*Institute for Organic Chemistry, University of Duisburg-Essen, 45117 Essen, Germany, and,*

<sup>h</sup>*Drug Delivery, Disposition and Dynamics, Monash Institute of Pharmaceutical Science, Royal Parade, Parkville, Victoria, 3052, Australia.*

*Email: Shane.Hickey@unisa.edu.au, fred.pfeffer@deakin.edu.au*

## CONTENTS

|                                                                                               |      |
|-----------------------------------------------------------------------------------------------|------|
| • Experimental data for all known compounds                                                   | p 2  |
| • <sup>1</sup> H and <sup>13</sup> C NMR spectra for novel compounds ( <b>Figure S1–S42</b> ) | p 15 |
| • Fluorescence profiles ( <b>Figure S43–48</b> )                                              | p 57 |
| • <b>Table S1</b> containing a list of all microbial strains tested                           | p 60 |
| • Disk diffusion results ( <b>Table S2, Figure S49</b> )                                      | p 61 |
| • Molecular Modelling Image ( <b>Figure S50</b> )                                             | p 62 |
| • Antifungal Activity ( <b>Table S3</b> )                                                     | p.62 |
| • References                                                                                  | p 63 |

## Experimental

### General

Chemicals were purchased from commercial sources and used without further purification. Anhydrous DMF and THF were obtained using the Pure Solv solvent drying system (Innovative Technology, Inc., Amesbury, MA, USA). Solvents were degassed and passed through two drying chambers of alumina and stored and collected under a positive pressure of nitrogen gas. Anhydrous  $\text{CH}_2\text{Cl}_2$  was obtained by drying over freshly activated 3 Å molecular sieves.

All microwave reactions were conducted using a CEM Discover S-Class Explorer 48 Microwave Reactor, operating on a frequency of 50/60 Hz and continuous irradiation power from 0–300 W. All reactions were performed in sealed reaction vessels.

All melting points were obtained using Stuart Scientific SMP3 melting point apparatus and are uncorrected. All  $^1\text{H}$  and  $^{13}\text{C}$  NMR spectra were collected on either a JEOL JNM-GX 270 MHz FT-NMR spectrometer, a JEOL JNM-ECP 400 MHz FT-NMR spectrometer, or a BRUKER ADVANCE III 500 MHz FT-NMR spectrometer where indicated. All NMR experiments were performed at 25 °C. All 2D NMR experiments were performed on a BRUKER ADVANCE 500 MHz FT-NMR spectrometer and can be provided upon request. Samples were dissolved in  $\text{CDCl}_3$ ,  $\text{DMSO}-d_6$  or  $\text{CD}_3\text{OD}$  where specified with the residual solvent peak used as the internal reference –  $\text{CDCl}_3$ ; 7.26 ( $^1\text{H}$ ) and 77.0 ( $^{13}\text{C}$ ),  $\text{DMSO}-d_6$ ; 2.50 ( $^1\text{H}$ ) and 39.52 ( $^{13}\text{C}$ ),  $\text{CD}_3\text{OD}$ ; 3.31 ( $^1\text{H}$ ) and 49.0 ( $^{13}\text{C}$ ). [1] Proton spectra are reported as chemical shift (ppm)  $\delta$  (integral, multiplicity (s = singlet, br s = broad singlet, d = doublet, t = triplet, q = quartet, quin = quintet and m = multiplet), coupling constant (Hz), assignment). Carbon spectra are reported as chemical shift  $\delta$  (ppm).

High resolution mass spectral data was collected on an Agilent Technologies 6520 QTOF mass spectrometer (LC-1200 series) under the following conditions: gas temperature (300 °C), nitrogen drying gas ( $10.0 \text{ L min}^{-1}$ ), capillary voltage (3500 V), fragmentor (140 V), and nebuliser (45 psi) in a 80% MeCN in  $\text{H}_2\text{O}$  solvent system. Analyte solutions were prepared in HPLC grade methanol (conc.  $\sim 1 \text{ mg mL}^{-1}$ ).

All norbornane-based compounds are named using the von-Baeyer system of nomenclature.[2] All other parts of the structure are named following the IUPAC guidelines. Numbering of norbornane protons follows the general structures shown below. Protons on the bridge carbon are labelled either *syn* (*s*) or *anti* (*a*) in regards to the priority functional group.

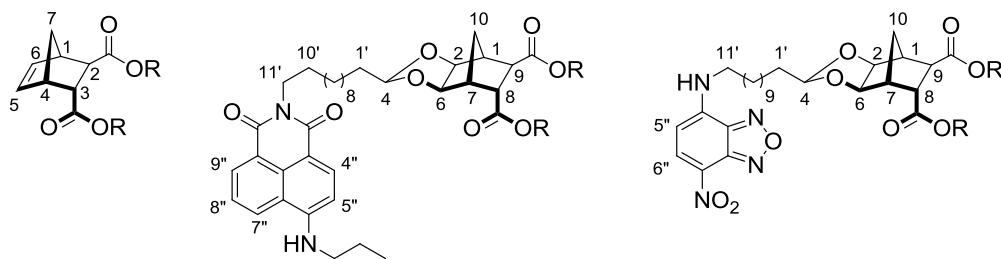

## 2-Methylisothiuronium iodide (**37**)[3]

[CAS Reg. No. 14257-47-7]

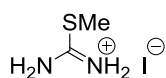

A mixture of thiourea (10.0 g, 0.13 mol), iodomethane (8.2 mL, 0.13 mol) and MeOH (100 mL) was heated at 65 °C for 90 min. The MeOH was removed *in vacuo* and the resulting yellow solid was transferred to a sintered glass funnel and washed with Et<sub>2</sub>O (5 × 50 mL) to afford the title compound (28.2 g, 99%) as an amorphous white powder.

m.p. 116–118 °C (lit. 117 °C).[4]

<sup>1</sup>H NMR (270 MHz, DMSO-*d*<sub>6</sub>) δ 8.89 (4H, br s, NH<sub>2</sub>), 2.56 (3H, s, CH<sub>3</sub>).

<sup>13</sup>C NMR (67.5 MHz, DMSO-*d*<sub>6</sub>) δ 171.1, 13.3.

## *N,N'*-Bis(*tert*-butoxycarbonyl)-*S*-methylisothiourea (**3**)[3]

[CAS Reg. No. 107819-90-9]

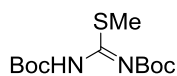

To a stirring solution of 2-methylisothiuronium iodide **37** (9.82 g, 45.0 mmol) in sat. NaHCO<sub>3</sub> (50 mL) and CH<sub>2</sub>Cl<sub>2</sub> (105 mL) was added Boc<sub>2</sub>O (19.67 g, 90.1 mmol) using CH<sub>2</sub>Cl<sub>2</sub> (3 × 25 mL). After 48 h the reaction mixture was transferred to a separatory funnel, the organic phase was isolated and the aqueous phase was extracted using CH<sub>2</sub>Cl<sub>2</sub> (2 × 50 mL). The combined organic phase was dried (MgSO<sub>4</sub>), filtered, and concentrated *in vacuo*. The crude solid was stirred in EtOH/H<sub>2</sub>O (1:9, 100 mL) for 1 h before the mixture was cooled to 0 °C and the solid was collected by vacuum filtration. Washing with EtOH/H<sub>2</sub>O (1:9, 50 mL) gives the title compound (12.3 g, 94%) as a white powder.

m.p. 122–124 °C (lit. 127 °C).[5]

$^1\text{H}$  NMR (270 MHz,  $\text{CDCl}_3$ )  $\delta$  11.61 (1H, br s, NH), 2.40 (3H, s,  $\text{CH}_3$ ), 1.53 (9H, br s, *t*-Bu), 1.51 (9H, br s, *t*-Bu).

$^{13}\text{C}$  NMR (100 MHz,  $\text{CDCl}_3$ )  $\delta$  171.6, 160.9, 150.9, 83.4, 81.1, 28.2, 14.6.

HRMS (ESI,  $m/z$ ) for  $\text{C}_{12}\text{H}_{22}\text{N}_2\text{O}_4\text{S}$  [ $\text{M} + \text{Na}$ ] $^+$  calc. 313.1193; found 313.1186.

## 2-[2,3-Bis(*tert*-butoxycarbonyl)guanidino]ethylamine (22)[6]

[CAS Reg. No. 203258-44-0]

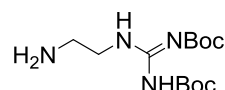

A solution of Boc-protected methylisothiourea **3** (20.4 g, 70.3 mmol) in  $\text{CH}_2\text{Cl}_2$  (110 mL) was added in one portion to a stirred solution of 1,2-ethylenediamine (11.7 mL, 176 mmol) in  $\text{CH}_2\text{Cl}_2$  (150 mL). The reaction was stirred at 21 °C for 90 min. The reaction mixture was transferred to a separatory funnel and washed with  $\text{H}_2\text{O}$  ( $2 \times 80$  mL), brine (80 mL), then dried ( $\text{MgSO}_4$ ) and filtered. The solvent was removed *in vacuo* at ambient temperature to afford the title compound (20.7 g, 97%) as a white powder. m.p. 96–100 °C.

$^1\text{H}$  NMR (270 MHz,  $\text{CDCl}_3$ )  $\delta$  11.51 (1H, br s, NH), 8.67 (1H, br s, NH), 3.49 (2H, app. q,  $J = 5.5$  Hz,  $\text{CH}_2$ ), 2.90 (2H, t,  $J = 6.2$  Hz,  $\text{CH}_2$ ), 1.51 (9H, br s, *t*-Bu), 1.50 (9H, br s, *t*-Bu).

$^{13}\text{C}$  NMR (67.5 MHz,  $\text{CDCl}_3$ )  $\delta$  163.7, 156.5, 153.3, 83.2, 79.4, 43.5, 41.1, 28.4, 28.2.

HRMS (ESI,  $m/z$ ) for  $\text{C}_{13}\text{H}_{26}\text{N}_4\text{O}_4$  [ $\text{M} + \text{H}$ ] $^+$  calc. 303.2027; found 303.2032.

## 2-(*tert*-Butoxycarbonylamino)ethylamine (38)[7]

[CAS Reg. No. 57260-73-8]

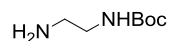

A solution of  $\text{Boc}_2\text{O}$  (8.35 g, 38.3 mmol) in THF (75 mL) was added dropwise, over approximately 30 min, to a stirred solution of ethylenediamine (EDA, 8.4 mL, 125 mmol) in THF (25 mL). The reaction was stirred for 4 h after which time the mixture was filtered and the solvent was then removed *in vacuo* to give the desired product (5.65 g, 92%) as a viscous oil.

$^1\text{H}$  NMR (270 MHz,  $\text{CDCl}_3$ )  $\delta$  4.83 (1H, br s, NH), 3.15 (2H, app. q,  $J = 6.0$  Hz,  $\text{NH}_2\text{CH}_2$ ), 2.78 (2H, t,  $J = 6.0$  Hz,  $\text{CH}_2\text{NH}$ ), 1.43 (9H, s, *t*-Bu), 1.16 (2H, br s,  $\text{NH}_2$ ).

$^{13}\text{C}$  NMR (67.5 MHz,  $\text{CDCl}_3$ )  $\delta$  156.3, 43.4, 41.8, 40.7, 28.4.

HRMS (ESI,  $m/z$ ) for  $C_7H_{16}N_2O_2$   $[M + H]^+$  calc. 161.1285; found 161.1290.

### Hexadecanal (39)[8]

[CAS Reg. No. 629-80-1]

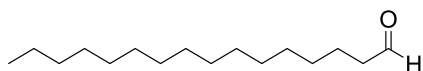

To the stirring solution of DMSO (700  $\mu$ L, 10.0 mmol) in  $CH_2Cl_2$  (40 mL) at  $-78$   $^{\circ}C$  was added oxalyl chloride (550  $\mu$ L, 6.0 mmol) under an inert atmosphere. After 20 min, 1-hexadecanol (486 mg, 2.0 mmol) in  $CH_2Cl_2$  (6 mL) was added and the reaction was stirred for 5.5 h at  $-41$   $^{\circ}C$ . The reaction was quenched with  $Et_3N$  (3 mL, 21.5 mmol) and slowly warmed to ambient temperature over 30 min. The reaction mixture was washed with sat.  $NaHCO_3$  (50 mL) and extracted with  $CH_2Cl_2$  ( $3 \times 30$  mL). The combined organic phase was washed with 2M HCl ( $2 \times 20$  mL), sat.  $NaHCO_3$  (20 mL), brine (20 mL), dried ( $MgSO_4$ ), filtered and concentrated *in vacuo* to afford a yellow solid (445 mg, 92%).

m.p.  $36-38$   $^{\circ}C$  (lit.  $33.0-35.0$   $^{\circ}C$ ).[9]

$^1H$  NMR (270 MHz,  $CDCl_3$ )  $\delta$  9.76 (1H, t,  $J = 1.9$  Hz, CHO), 2.41 (2H, dt,  $J = 7.4, 1.9$  Hz,  $CH_2$ ), 1.62 (2H, app. t,  $J = 7.4$  Hz,  $CH_2$ ), 1.30–1.25 (24H, m,  $12 \times CH_2$ ), 0.87 (3H, t,  $J = 6.4$  Hz,  $CH_3$ ).

$^{13}C$  NMR (100 MHz,  $CDCl_3$ )  $\delta$  203.1, 44.1, 32.1, 29.8 ( $6 \times C$ ), 29.7, 29.6, 29.5, 29.3, 22.8, 22.2, 14.2.

### *N*-(*tert*-Butoxycarbonyl)-12-aminododecanoic acid (40)[10]

[CAS Reg. No. 18934-81-1]

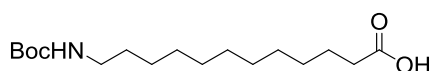

A 250 mL round-bottom flask was charged with 12-aminododecanoic acid (6.00 g, 27.86 mmol),  $Boc_2O$  (6.08 g, 27.86 mmol),  $Et_3N$  (4.7 mL, 33.62 mmol) and MeOH (90 mL) and stirred at  $60$   $^{\circ}C$  for 16 h. The colourless solution was concentrated under reduced pressure and the residue was dissolved in EtOAc (150 mL). The organic phase was washed with 0.25 M HCl ( $2 \times 40$  mL), brine (40 mL), dried ( $MgSO_4$ ), filtered and concentrated *in vacuo* to give the title compound (7.47 g, 85%) as a white solid.

m.p.  $85-86$   $^{\circ}C$  (lit.  $83.5-84.5$   $^{\circ}C$ ).[11]

$^1H$  NMR (500 MHz,  $CDCl_3$ )  $\delta$  4.53 (1H, br s, NH), 3.10–3.09 (2H, m,  $NHCH_2$ ), 2.33 (2H, t,  $J = 7.5$  Hz,  $CH_2CO_2H$ ), 1.62 (2H, app. quin,  $J = 7.5$  Hz,  $CH_2$ ), 1.48–1.44 (11H, m, *t*-Bu,  $CH_2$ ), 1.34–1.26 (14H, m,  $7 \times CH_2$ ).

$^{13}\text{C}$  NMR (125 MHz,  $\text{CDCl}_3$ )  $\delta$  179.2, 156.2, 79.2, 40.8, 34.1, 30.2, 29.6, 29.54, 29.46, 29.4, 29.3, 29.1, 28.6, 26.9, 24.8.

HRMS (ESI,  $m/z$ ) for  $\text{C}_{17}\text{H}_{33}\text{NO}_4$   $[\text{M} + \text{Na}]^+$  calc. 338.2302; found 338.2309.

#### ***N*-(*tert*-Butoxycarbonyl)-12-aminododecan-1-ol (14)[10]**

[CAS Reg. No. 67341-03-1]

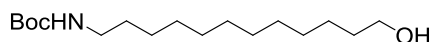

To a stirring solution of carboxylic acid **40** (7.33 g, 23.25 mmol) and anhydrous THF (110 mL) at 0 °C under an inert atmosphere, was added Red-Al<sup>®</sup> (18 mL, 59.97 mmol) dropwise over 25 min. The reaction was warmed to ambient temperature and stirring was maintained for 1 h before the reaction was cooled on ice and slowly quenched with sat.  $\text{Na}_2\text{SO}_3$  (30 mL). The precipitate was removed using vacuum filtration and the filtrate was concentrated under reduced pressure before being diluted with EtOAc (100 mL). The organic phase was washed with  $\text{H}_2\text{O}$  ( $2 \times 40$  mL), brine (40 mL), dried ( $\text{MgSO}_4$ ), filtered and concentrated *in vacuo* to give the title compound (5.31 g, 76%) as a white solid.

m.p. 82–83 °C.

$^1\text{H}$  NMR (270 MHz,  $\text{CDCl}_3$ )  $\delta$  4.48 (1H, br s, NH), 3.63 (2H, t,  $J = 6.6$  Hz,  $\text{CH}_2\text{CO}_2\text{H}$ ), 3.09 (2H, t,  $J = 7.0$  Hz,  $\text{NHCH}_2$ ), 1.56–1.26 (29H, m,  $10 \times \text{CH}_2$ , *t*-Bu).

$^{13}\text{C}$  NMR (125 MHz,  $\text{CDCl}_3$ )  $\delta$  156.2, 79.2, 63.2, 40.8, 32.9, 30.2, 29.70, 29.66 ( $3 \times \text{C}$ ), 29.5, 29.4, 28.6, 26.9, 25.9.

HRMS (ESI,  $m/z$ ) for  $\text{C}_{17}\text{H}_{35}\text{NO}_3$   $[\text{M} + \text{Na}]^+$  calc. 324.2509; found 324.2504.

#### **Dimethyl bicyclo[2.2.1]hept-5-ene-3-endo-2-exo-dicarboxylate (41)**

[CAS Reg. No. 3014-58-2]

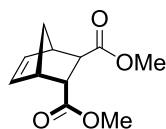

*Method A*[12]

To the stirring solution of dimethyl fumarate (65.3 g, 0.453 mol) in THF (200 mL), was added freshly prepared cyclopentadiene (40 mL, 0.476 mol), and the reaction was stirred at ambient temperature for 16 h. The solvent was removed under reduced pressure to give the title compound (95.2 g, 99%) as a colourless oil.

*Method B*[13, 14]

A 35 mL MW vial was charged with dicyclopentadiene (2.0 mL, 15.0 mmol), dimethyl fumarate (2.88 g, 20.0 mmol) and hydroquinone (100 mg, 0.90 mmol), and heated using microwave irradiation to 150 °C for 2 h. The resulting orange oil was purified by flash column chromatography (10% EtOAc in pet. spirits) to give a clear oil (4.14 g, 98%).

$R_f$  = 0.32 (10% EtOAc in pet. spirits).

$^1\text{H}$  NMR (400 MHz,  $\text{CDCl}_3$ )  $\delta$  6.27 (1H, dd,  $J$  = 5.6, 3.1 Hz, H5), 6.06 (1H, dd,  $J$  = 5.6, 2.8 Hz, H6), 3.71 (3H, s, Me), 3.64 (3H, s, Me), 3.37 (1H, app. t,  $J$  = 5.6 Hz, H3), 3.25 (1H, br s, H1), 3.12 (1H, br s, H4), 2.68 (1H, dd,  $J$  = 3.1, 1.2 Hz, H2), 1.61 (1H, d,  $J$  = 8.8 Hz, H7a), 1.45 (1H, dd,  $J$  = 8.8, 1.7 Hz, H7s).

$^{13}\text{C}$  NMR (100 MHz,  $\text{CDCl}_3$ )  $\delta$  175.2, 174.0, 137.7, 135.3, 51.9, 51.7, 47.7, 47.5, 47.2, 46.9, 45.5.

HRMS (ESI,  $m/z$ ) for  $\text{C}_{11}\text{H}_{14}\text{O}_4$   $[\text{M} + \text{Na}]^+$  calc. 233.0784; found 233.0785.

**Dimethyl 5,6-*exo*-dihydroxybicyclo[2.2.1]heptane-3-*endo*-2-*exo*-dicarboxylate (17)**

[CAS Reg. No. 1228039-59-5]

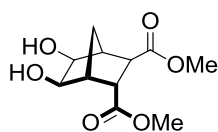

*Method A*[15]

The dimethyl ester **41** (3.05 g, 14.5 mmol) and  $\text{NMO}\cdot\text{H}_2\text{O}$  (1.87 g, 16.0 mmol) were dissolved in a solution of  $\text{H}_2\text{O}/\text{acetone}$  (1:4, 36 mL) to which  $\text{OsO}_4$  (4% in  $\text{H}_2\text{O}$ , 730  $\mu\text{L}$ , 0.40 mol%) was added. The reaction was stirred for 3 d and then quenched with sat.  $\text{NaHSO}_3$  (30 mL). The suspension was extracted with EtOAc ( $4 \times 25$  mL), and the combined organic phase was washed with brine (25 mL), dried ( $\text{MgSO}_4$ ), filtered, and concentrated *in vacuo* to give the title compound (3.34 g, 94%) as a white solid.

*Method B*[16]

A solution of  $\text{KMnO}_4$  (405 mg, 2.56 mmol),  $\text{K}_2\text{CO}_3$  (212 mg, 1.54 mmol) in  $\text{H}_2\text{O}$  (6.0 mL) was added dropwise to a stirring solution of dimethyl ester **41** (270 mg, 1.28 mmol), *t*-BuOH (4.7 mL) and  $\text{H}_2\text{O}$  (1.2 mL) at 0 °C. The reaction was stirred for a further 25 min before consumption of starting material was observed by TLC analysis. The reaction mix was quenched with sat.  $\text{NaHSO}_3$  (25 mL) and extracted with EtOAc ( $3 \times 20$  mL). The combined organic phase was washed with brine (20 mL), dried ( $\text{MgSO}_4$ ), filtered, and concentrated *in vacuo* to afford the title compound (181 mg, 58%) as a white solid.

m.p. 90–92 °C (lit. 81–84 °C).[15]

<sup>1</sup>H NMR (270 MHz, CDCl<sub>3</sub>) δ 3.85 (1H, br s, H5), 3.77–3.71 (1H, m, H6), 3.64 (3H, s, Me), 3.62 (3H, s, Me), 3.11 (1H, app. t, *J* = 5.1 Hz, H3), 2.63 (1H, d, *J* = 4.9 Hz, H2), 2.46 (1H, dd, *J* = 4.5, 1.2 Hz, H4), 2.40 (1H, br s, H1), 1.78 (1H, dd, *J* = 11.0, 1.2 Hz, H7a), 1.33 (1H, d, *J* = 11.0 Hz, H7s).

<sup>13</sup>C NMR (67.5 MHz, CDCl<sub>3</sub>) δ 174.2, 173.2, 73.3, 70.2, 52.5, 52.3, 48.2, 46.4, 46.2, 44.8, 31.8.

HRMS (ESI, *m/z*) for C<sub>11</sub>H<sub>16</sub>O<sub>6</sub> [M + Na]<sup>+</sup> calc. 267.0839; found 267.0836.

#### Dimethyl 4-heptyl-3,5-dioxatricyclo[5.2.1.0<sup>2,6</sup>]decane-8-endo-9-exo-dicarboxylate (42)[17]

[CAS Reg. No. 1233074-95-7]

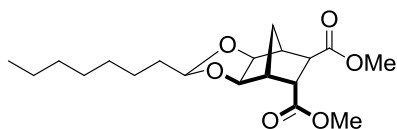

To a stirring suspension of diol **17** (3.50 g, 14.34 mmol), *p*-TSA (140 mg, 0.72 mmol), MgSO<sub>4</sub> (1.73 g, 14.34 mmol) and PhMe (24 mL) was added octanal (3.4 mL, 21.5 mmol) and the reaction was heated for 3 h at 120 °C. Solid MgSO<sub>4</sub> was removed by filtration and the filtrate was diluted with EtOAc (50 mL), washed with H<sub>2</sub>O (2 × 15 mL), brine (15 mL), dried (MgSO<sub>4</sub>), filtered, and concentrated *in vacuo* to give the crude material which was purified using column chromatography (10% EtOAc in pet. spirits) to afford the title compound (4.66 g, 92%) as a light yellow viscous oil.

*R*<sub>f</sub> = 0.26 (10% EtOAc in pet. spirits).

<sup>1</sup>H NMR (400 MHz, CDCl<sub>3</sub>) δ 4.61 (1H, t, *J* = 4.9 Hz, H4), 3.98 (1H, d, *J* = 5.6 Hz, H2), 3.85 (1H, d, *J* = 5.6 Hz, H6), 3.66 (6H, s, 2 × Me), 3.18 (1H, app. t, *J* = 4.7 Hz, H8), 2.67 (1H, d, *J* = 4.7 Hz, H9), 2.60 (2H, br s, H1, H7), 1.73 (1H, d, *J* = 10.8 Hz, H10a), 1.59–1.56 (2H, m, CHCH<sub>2</sub>), 1.36–1.19 (11H, m, 5 × CH<sub>2</sub>, H10s), 0.82 (3H, t, *J* = 6.6 Hz, CH<sub>3</sub>).

<sup>13</sup>C NMR (100 MHz, CDCl<sub>3</sub>) δ 174.2, 173.0, 104.2, 81.2, 78.7, 52.1, 51.9, 45.0, 44.8, 43.4, 43.0, 32.5, 31.5, 31.3, 29.2, 28.9, 23.9, 22.3, 13.7.

HRMS (ESI, *m/z*) for C<sub>19</sub>H<sub>30</sub>O<sub>6</sub> [M + Na]<sup>+</sup> calc. 377.1935; found 377.1924.

#### 4-Heptyl-3,5-dioxatricyclo[5.2.1.0<sup>2,6</sup>]decane-8-endo-9-exo-dicarboxylic acid (43)[17]

[CAS Reg. No. 1233074-96-8]

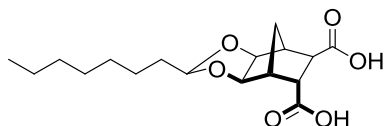



To the stirred solution of the ester **42** (1.00 g, 2.82 mmol) in THF (12 mL), 2M NaOH (6 mL) was added and the reaction was stirred for 16 h at ambient temperature. The reaction was concentrated under reduced pressure and all organic-soluble impurities were extracted with CH<sub>2</sub>Cl<sub>2</sub> (2 × 10 mL). The aqueous solution was acidified with sat. KH<sub>2</sub>PO<sub>4</sub> (pH = 5), extracted with EtOAc (3 × 15 mL), dried (MgSO<sub>4</sub>) and filtered to give a white waxy solid (795 mg, 86%).

m.p. 141–143 °C (lit. 153.0–154.0 °C).[15]

<sup>1</sup>H NMR (270 MHz, DMSO-*d*<sub>6</sub>) δ 4.62 (1H, t, *J* = 4.7 Hz, H4), 3.97 (2H, d, *J* = 5.6 Hz, H2), 3.88 (1H, d, *J* = 5.6 Hz, H6), 3.00 (1H, dd, *J* = 5.2, 0.6 Hz, H8), 2.45 (1H, br s, H7), 2.54 (1H, br s, H1), 2.40 (1H, d, *J* = 5.2 Hz, H9), 1.61–1.50 (3H, m, CHCH<sub>2</sub>, H10a), 1.33–1.19 (11H, m, 5 × CH<sub>2</sub>, H10s), 0.85 (3H, t, *J* = 6.4 Hz, CH<sub>3</sub>).

<sup>13</sup>C NMR (67.5 MHz, CDCl<sub>3</sub>) δ 174.6, 173.3, 103.2, 80.7, 78.2, 45.0, 44.4, 43.3, 42.6, 32.3, 31.2 (2 × C), 28.9, 28.6, 23.7, 22.1, 14.0.

HRMS (ESI, *m/z*) for C<sub>17</sub>H<sub>26</sub>O<sub>6</sub> [M + Na]<sup>+</sup> calc. 349.1622; found 349.1627.

**8-endo-9-exo-Di[2'-(2'',3''-bis-*tert*-butoxycarbonylamino)ethylcarbamoyl]-4-heptyl-3,5-dioxatricyclo[5.2.1.0<sup>2,6</sup>]decane (**44**)[17]**

[CAS Reg. No. 1774366-82-3]

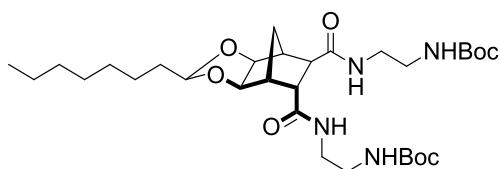

A MW vial was charged with diacid **43** (333 mg, 1.02 mmol), EDCI (590 mg, 3.06 mmol), HOBt (14 mg, 0.1 mmol) and anhydrous CHCl<sub>3</sub> (2.1 mL) and was stirred at ambient temperature for 30 min. Amine **50** (490 mg, 3.06 mmol) was then added and the reaction was irradiated for 30 min at 50 °C. The resulting homogenous clear liquid was diluted with CHCl<sub>3</sub> (15 mL), washed with brine (3 × 10 mL), dried (MgSO<sub>4</sub>), filtered, and concentrated *in vacuo* to afford a white solid that was purified by flash column chromatography (50–70% EtOAc in pet. spirits) to give the title compound (357 mg, 57%) as a white solid.

*R<sub>f</sub>* = 0.21 (70% EtOAc in pet. spirits).

m.p. 122–123 °C.

<sup>1</sup>H NMR (270 MHz, CDCl<sub>3</sub>) δ 6.89 (1H, br s, NH), 6.86 (1H, br s, NH), 5.08–5.01 (2H, m, 2 × NH), 4.64 (1H, t, *J* = 4.8 Hz, H4), 4.13 (1H, d, *J* = 5.7 Hz, H6), 3.96 (1H, d, *J* = 5.7 Hz, H2), 3.41–3.26 (8H, m, 4 × NHCH<sub>2</sub>), 2.92 (1H, app. t, *J* = 5.1 Hz, H8), 2.57–2.53 (2H, m, H7, H9), 2.43 (1H, d, *J* = 5.0 Hz,

H1), 1.80 (1H, d,  $J = 10.3$  Hz, H10a), 1.65–1.57 (3H, m, CHCH<sub>2</sub>, H10s), 1.44–1.25 (28H, m, 5 × CH<sub>2</sub>, 2 × *t*-Bu), 0.87 (3H, t,  $J = 6.9$  Hz, CH<sub>3</sub>).

<sup>13</sup>C NMR (67.5 MHz, CDCl<sub>3</sub>) δ 174.3, 172.5, 157.1, 156.8, 104.2, 81.6, 80.0, 79.8, 78.8, 47.8, 44.7, 44.5, 43.4 (2 × C), 41.2, 40.6, 40.4, 33.0, 32.6, 31.9, 29.8, 29.6, 29.3, 28.5, 24.4, 22.8, 14.2.

HRMS (ESI,  $m/z$ ) for C<sub>31</sub>H<sub>54</sub>N<sub>4</sub>O<sub>8</sub> [M + H]<sup>+</sup> calc. 611.4014; found 611.4031.

#### 4-Heptyl-3,5-dioxatricyclo[5.2.1.0<sup>2,6</sup>]decane-8-endo-9-exo-dicarboxamidoethylamine hydrogen chloride (5)[15]

[CAS Reg. No. 1233074-99-1]

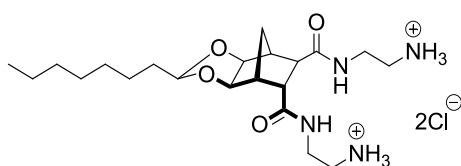

To a stirring solution of Boc-protected amine **44** (650 mg, 1.06 mmol) and MeOH (10.6 mL) was added dropwise AcCl (760 μL, 10.6 mmol), and the reaction was stirred for 24 h at ambient temperature. The reaction was concentrated *in vacuo* and co-evaporated with MeOH (2 × 0.5 mL), to afford the title compound (510 mg, 99%) as a white solid.

m.p. 242–243 °C.

<sup>1</sup>H NMR (270 MHz, CD<sub>3</sub>OD) δ 4.66 (1H, t,  $J = 4.7$  Hz, H4), 4.04 (1H, d,  $J = 5.6$  Hz, H2), 4.00 (1H, d,  $J = 5.6$  Hz, H6), 3.53–3.35 (4H, m, 2 × NHCH<sub>2</sub>), 3.23 (1H, app. t,  $J = 4.9$  Hz, H8), 3.10–3.03 (4H, m, 2 × NHCH<sub>2</sub>), 2.65–2.62 (2H, m, H1, H7), 2.51 (1H, br s, H9), 1.75 (1H, d,  $J = 9.8$  Hz, H10a), 1.64–1.56 (2H, m, CHCH<sub>2</sub>), 1.48–1.29 (11H, m, 5 × CH<sub>2</sub>, H10s), 0.90 (3H, t,  $J = 6.5$  Hz, CH<sub>3</sub>).

<sup>13</sup>C NMR (67.5 MHz, CD<sub>3</sub>OD) δ 177.0, 175.1, 105.1, 82.8, 80.0, 47.3, 47.1, 45.1, 44.9, 40.8, 38.5, 38.4, 33.9, 32.9, 32.7, 30.6, 30.3, 28.2, 25.2, 23.7, 14.4.

HRMS (ESI,  $m/z$ ) for C<sub>21</sub>H<sub>38</sub>N<sub>4</sub>O<sub>4</sub> [M + 2H]<sup>2+</sup> calc. 206.1519; found 206.1528.

#### Dimethyl 4-pentadecyl-3,5-dioxatricyclo[5.2.1.0<sup>2,6</sup>]decane-8-endo-9-exo-dicarboxylate (45)[17]

[CAS Reg. No. 1774366-94-7]

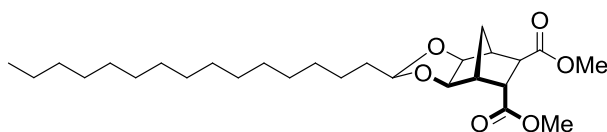

To a stirring suspension of diol **17** (403 mg, 2.0 mmol), *p*-TSA (18 mg, 0.139 mmol), MgSO<sub>4</sub> (210 mg, 1.31 mmol) and PhMe (5 mL) was added hexadecanal **39** (805 mg, 3.0 mmol) and the reaction was heated for 16 h at 110 °C. Solid MgSO<sub>4</sub> was removed by filtration and the filtrate was diluted with EtOAc (30 mL), washed with H<sub>2</sub>O (2 × 25 mL), brine (25 mL), dried (MgSO<sub>4</sub>), filtered, and concentrated *in vacuo* to give the crude material which was purified by column chromatography (5% EtOAc in pet. spirits) to afford the title compound (505 mg, 65%) as a white solid.

*R<sub>f</sub>* = 0.10 (50% EtOAc in pet. spirits).

m.p. 71–74 °C.

<sup>1</sup>H NMR (270 MHz, CDCl<sub>3</sub>) δ 4.65 (1H, t, *J* = 4.8 Hz, H4), 4.03 (1H, d, *J* = 5.4 Hz, H2), 3.90 (1H, d, *J* = 5.4 Hz, H6), 3.70 (6H, s, 2 × Me), 3.22 (1H, app. t, *J* = 4.9 Hz, H8), 2.72 (1H, d, *J* = 4.9 Hz, H9), 2.66–2.64 (2H, m, H1, H7), 1.78 (1H, dd, *J* = 10.7, 1.4 Hz, H10<sub>a</sub>), 1.66–1.59 (2H, m, CHCH<sub>2</sub>), 1.41–1.25 (27H, m, 13 × CH<sub>2</sub>, H10<sub>s</sub>), 0.88 (3H, t, *J* = 6.4 Hz, CH<sub>3</sub>).

<sup>13</sup>C NMR (67.5 MHz, CDCl<sub>3</sub>) δ 174.1, 172.9, 104.4, 81.4, 78.9, 52.5, 52.3, 45.4, 45.2, 43.8, 43.4, 32.9, 32.1, 31.8, 29.8 (6 × C), 29.7 (2 × C), 29.6, 29.5, 24.4, 22.8, 14.3.

HRMS (ESI, *m/z*) for C<sub>27</sub>H<sub>46</sub>O<sub>6</sub> [M + H]<sup>+</sup> calc. 467.3367; found 467.3378.

#### 4-Pentadecyl-3,5-dioxatricyclo[5.2.1.0<sup>2,6</sup>]decane-8-*endo*-9-*exo*-dicarboxylic acid (**46**)[17]

[CAS Reg. No. 1233075-00-7]

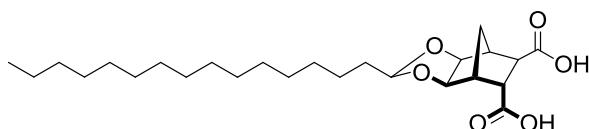

To the stirred solution of the ester **45** (258 mg, 0.56 mmol) in THF (2.3 mL), 2M NaOH (1.1 mL) was added and the reaction was stirred for 16 h at ambient temperature. The reaction was concentrated under reduced pressure and all organic-soluble impurities were extracted with CH<sub>2</sub>Cl<sub>2</sub> (2 × 10 mL). The aqueous solution was acidified with sat. KH<sub>2</sub>PO<sub>4</sub> (pH = 5), extracted with EtOAc (4 × 25 mL), dried (MgSO<sub>4</sub>) and filtered to give a white waxy solid (198 mg, 86%).

m.p. 127–134 °C (lit. 125.0–127.0 °C).[15]

<sup>1</sup>H NMR (270 MHz, DMSO-*d*<sub>6</sub>) δ 4.62 (1H, t, *J* = 4.7 Hz, H4), 3.96 (1H, d, *J* = 5.6 Hz, H2), 3.89 (1H, d, *J* = 5.6 Hz, H6), 3.00 (1H, app. t, *J* = 5.0 Hz, H8), 2.53 (1H, br s, H1), 2.45 (1H, br s, H7), 2.40 (1H, d, *J* = 5.0 Hz, H9), 1.62–1.49 (3H, m, CHCH<sub>2</sub>, H10<sub>a</sub>), 1.23–1.18 (27H, m, 13 × CH<sub>2</sub>, H10<sub>s</sub>), 0.85 (3H, t, *J* = 6.2 Hz, CH<sub>3</sub>).

<sup>13</sup>C NMR (100 MHz DMSO-*d*<sub>6</sub>) δ 174.6, 173.3, 103.2, 80.7, 78.2, 45.0, 44.4, 43.6, 43.3, 32.3, 31.3, 31.2, 29.0 (7 × C), 28.9 (2 × C), 28.7, 23.6, 22.1, 13.9.

HRMS (ESI,  $m/z$ ) for  $C_{25}H_{42}O_6$  [ $M + Na$ ] $^+$  calc. 461.2874; found 461.2882.

**8-endo-9-exo-Di[2'-(2'',3''-bis-*tert*-butoxycarbonylamino)ethylcarbamoyl]-4-pentadecyl-3,5-dioxatricyclo[5.2.1.0<sup>2,6</sup>]decane (47)[17]**

[CAS Reg. No. 1774366-99-2]

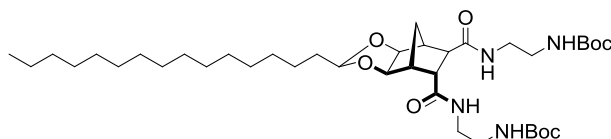

A MW vial was charged with diacid **46** (350 mg, 0.798 mmol), EDCI (640 mg, 3.34 mmol), HOBt (12 mg, 0.089 mmol) and anhydrous  $CHCl_3$  (13 mL) and stirred at ambient temperature for 30 min. Amine **38** (387 mg, 2.42 mmol) was then added and the reaction was irradiated for 30 min at 50 °C. The resulting homogenous clear solution was diluted with  $CHCl_3$  (15 mL), washed with brine (3 × 10 mL), dried ( $MgSO_4$ ), filtered, and concentrated *in vacuo* to afford a white solid that was purified using flash column chromatography (50–70% EtOAc in pet. spirits) to give the title compound (303 mg, 52%) as a colourless oil.

$R_f$  = 0.07 (70% EtOAc in pet. spirits).

$^1H$  NMR (500 MHz,  $CDCl_3$ )  $\delta$  6.84 (1H, br s, NH), 6.69 (1H, br s, NH), 5.08–5.01 (2H, m, 2 × NH), 4.64 (1H, t,  $J$  = 4.9 Hz, H4), 4.13 (1H, d,  $J$  = 5.2 Hz, H6), 3.96 (1H, d,  $J$  = 5.2 Hz, H2), 3.43–3.22 (8H, m, 4 ×  $NHCH_2$ ), 2.91 (1H, app. t,  $J$  = 5.3 Hz, H8), 2.57 (1H, br s, H1), 2.54 (1H, d,  $J$  = 3.7 Hz, H7), 2.42 (1H, d,  $J$  = 5.3 Hz, H9), 1.81 (1H, d,  $J$  = 9.8 Hz, H10 $a$ ), 1.64–1.59 (2H, m,  $CHCH_2$ ), 1.44–1.43 (18H, m, 2 ×  $t$ -Bu), 1.39–1.24 (27H, m, 13 ×  $CH_2$ , H10 $s$ ), 0.87 (3H, t,  $J$  = 6.9 Hz,  $CH_3$ ).

$^{13}C$  NMR (125 MHz,  $CDCl_3$ )  $\delta$  174.3, 172.5, 157.1, 156.8, 104.2, 81.6, 80.0, 79.8, 78.7, 47.8, 44.6, 44.5, 43.4, 41.1, 40.6, 40.5, 34.0, 33.0, 32.6, 32.1, 29.84 (2 × C), 29.81 (2 × C), 29.80 (2 × C), 29.72, 29.69, 29.67, 29.5, 28.55, 28.53, 24.4, 22.8, 14.3.

HRMS (ESI,  $m/z$ ) for  $C_{39}H_{70}N_4O_8$  [ $M + H$ ] $^+$  calc. 723.5266; found 723.5263.

**4-Pentadecyl-3,5-dioxatricyclo[5.2.1.0<sup>2,6</sup>]decane-8-endo-9-exo-dicarboxamidoethylamine hydrogen chloride (8)[17]**

[CAS Reg. No. 1774367-02-0]

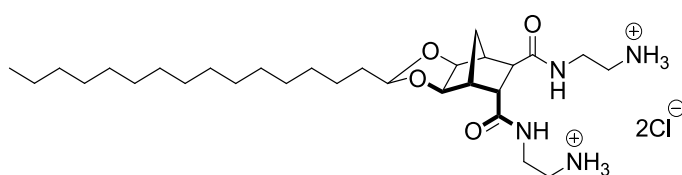

To a stirring solution of Boc-protected amine **47** (76 mg, 0.11 mmol) and MeOH (1.1 mL) was added dropwise AcCl (80  $\mu$ L, 1.1 mmol), and the reaction was stirred for 24 h at ambient temperature. The reaction was concentrated *in vacuo* and co-evaporated with MeOH (2  $\times$  0.5 mL), to afford the title compound (58 mg, 94%) as a white solid.

m.p. 156–200  $^{\circ}$ C (slow decomposition).

$^1\text{H}$  NMR (500 MHz, DMSO- $d_6$ )  $\delta$  8.33 (1H, t,  $J$  = 5.5 Hz, NH), 8.23 (1H, t,  $J$  = 5.4 Hz, NH), 7.96 (6H, br s, 2  $\times$  NH $_3$ ), 4.59 (1H, t,  $J$  = 4.7 Hz, H4), 3.91 (1H, d,  $J$  = 5.6 Hz, H2), 3.86 (1H, d,  $J$  = 5.6 Hz, H6), 3.32–3.19 (4H, m, 2  $\times$  NHCH $_2$ ), 3.10 (1H, app. t,  $J$  = 4.7 Hz, H8), 2.86–2.81 (4H, m, 2  $\times$  NHCH $_2$ ), 2.60 (1H, d,  $J$  = 4.7 Hz, H9), 2.51–2.49 (1H, m, H7), 2.41 (1H, br s, H1), 1.53–1.49 (3H, m, CHCH $_2$ , H10a), 1.31–1.23 (27H, m, 13  $\times$  CH $_2$ , H10s), 0.85 (3H, t,  $J$  = 7.1 Hz, CH $_3$ ).

$^{13}\text{C}$  NMR (125 MHz, DMSO- $d_6$ )  $\delta$  173.5, 171.5, 102.9, 81.0, 78.2, 46.1, 44.5, 43.1, 42.8, 38.5, 38.4, 36.8, 36.7, 32.4, 31.3, 31.1, 29.1 (3  $\times$  C), 29.04 (3  $\times$  C), 28.99 (3  $\times$  C), 28.7, 23.8, 22.1, 14.0.

HRMS (ESI,  $m/z$ ) for C $_{29}$ H $_{54}$ N $_4$ O $_4$  [M + 2H] $^{2+}$  calc. 262.2145; found 262.2150.

### 6-Amino-2-propyl-1H-benz[de]isoquinoline-1,3-(2H)-dione (**35**)[18]

[CAS Reg. No. 94860-68-1]

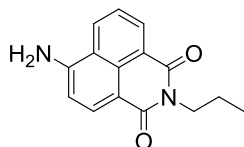

A stirring solution of *tert*-Butyl (1,3-dioxo-2-propyl-2,3-dihydro-1H-benzo[de]isoquinolin-6-yl)carbamate[19] (106 mg, 0.299 mmol) in CH $_2$ Cl $_2$  (2.7 mL) was treated with TFA (300  $\mu$ L, 3.918 mmol, 13.1 equiv.) and the homogeneous yellow solution stirred at ambient temperature for 18 h. After this time an orange precipitate had formed. The solvent was removed under reduced pressure to give a powder that was reconstituted in H $_2$ O (*ca.* 3 mL) and the pH was adjusted to 8 using sat. NaHCO $_3$ . The resulting solid was collected using vacuum filtration, washing with H $_2$ O gives the title compound (72 mg, 95%) as a light orange powder.

$^1\text{H}$  NMR (500 MHz, CDCl $_3$ )  $\delta$  8.60 (dd,  $J$  = 7.4, 0.7, 1H), 8.42 (d,  $J$  = 8.1, 1H), 8.10 (dd,  $J$  = 8.3, 0.7, 1H), 7.66 (dd,  $J$  = 8.3, 7.4, 1H), 6.89 (d,  $J$  = 8.1, 1H), 4.14–4.11 (m, 2H), 1.75 (app. sext,  $J_{\text{app}}$  = 7.5, 2H), 1.01 (t,  $J$  = 7.5, 3H).

$^{13}\text{C}$  NMR (125 MHz, CDCl $_3$ )  $\delta$  164.6, 164.1, 148.9, 133.7, 131.5, 129.8, 126.7, 125.0, 123.2, 120.1, 112.3, 109.6, 41.7, 21.4, 11.5.

Data is in accordance with the literature.[18]

#### 4-Propylamino-7-nitrobenzo-2-oxa-1,3-diazole (36)[20]

[CAS Reg. No. 54517-98-5]

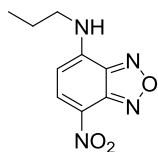

To the stirring solution of 4-chloro-7-nitrobenzofuran (196 mg, 0.982 mmol) in MeOH (9.8 mL) was added propylamine (80  $\mu$ L, 0.982 mmol) and Et<sub>3</sub>N (210  $\mu$ L, 1.51 mmol). Stirring was maintained at ambient temperature for 24 h before the reaction mixture was concentrated under reduced pressure. The crude material was diluted in EtOAc (20 mL) and washed with 0.1 M HCl (10 mL), sat. NaHCO<sub>3</sub> (10 mL), brine (10 mL), dried (MgSO<sub>4</sub>), filtered and concentrated *in vacuo* to afford the title compound (204 mg, 94%) as a dark green oil.

<sup>1</sup>H NMR (500 MHz, CDCl<sub>3</sub>)  $\delta$  8.49 (1H, d,  $J$  = 8.7 Hz, ArH), 6.31 (1H, br s, NH), 6.18 (1H, d,  $J$  = 8.7 Hz, ArH), 3.49–3.46 (2H, m, NHCH<sub>2</sub>), 1.89–1.82 (2H, m, CH<sub>2</sub>CH<sub>3</sub>), 1.10 (3H, t,  $J$  = 7.4 Hz, CH<sub>3</sub>).

<sup>13</sup>C NMR (125 MHz, CDCl<sub>3</sub>)  $\delta$  144.4, 144.1, 144.0, 136.7, 124.0, 98.7, 45.8, 22.0, 11.6.

HRMS (ESI,  $m/z$ ) for C<sub>9</sub>H<sub>10</sub>N<sub>4</sub>O<sub>3</sub> [M + H]<sup>+</sup> calc. 223.0826; found 223.0823.

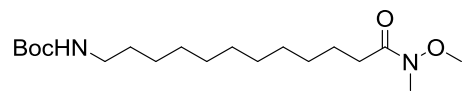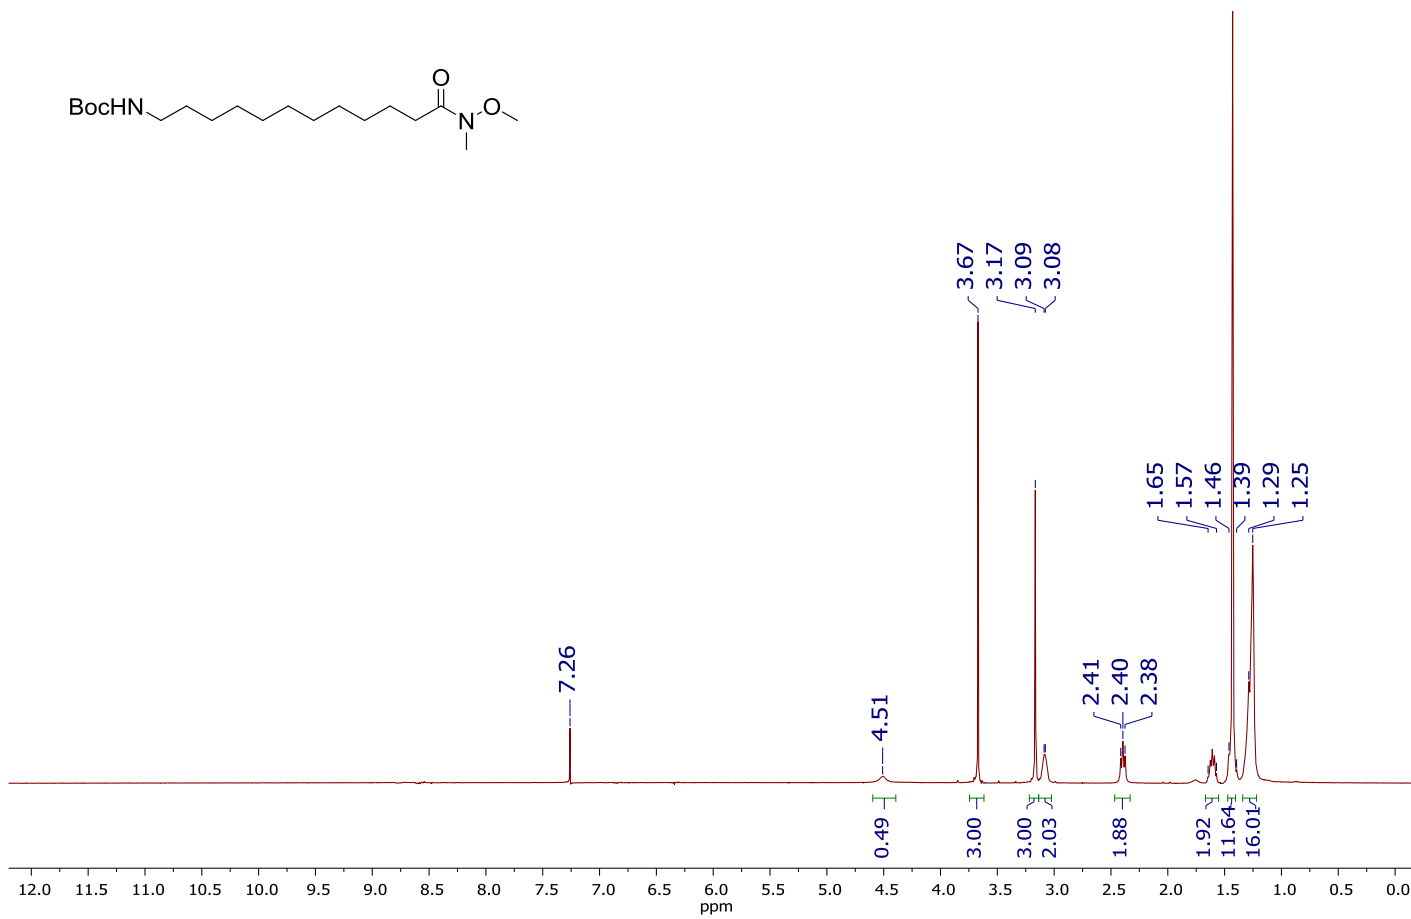

Figure S1:  $^1\text{H}$  NMR spectrum of **15** in  $\text{CDCl}_3$ .

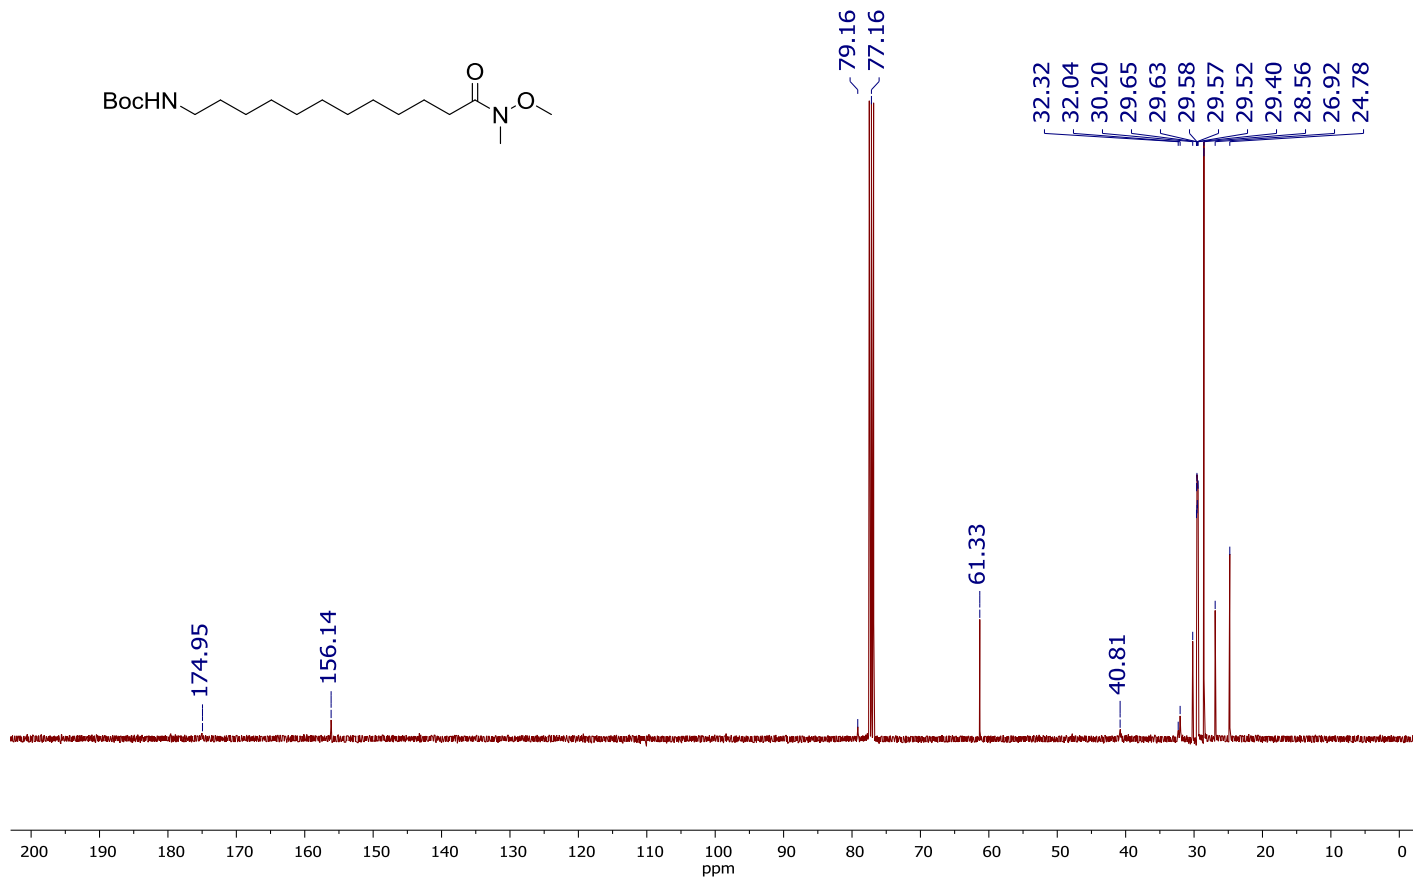

**Figure S2:**  $^{13}\text{C}$  NMR spectrum of **15** in  $\text{CDCl}_3$ .



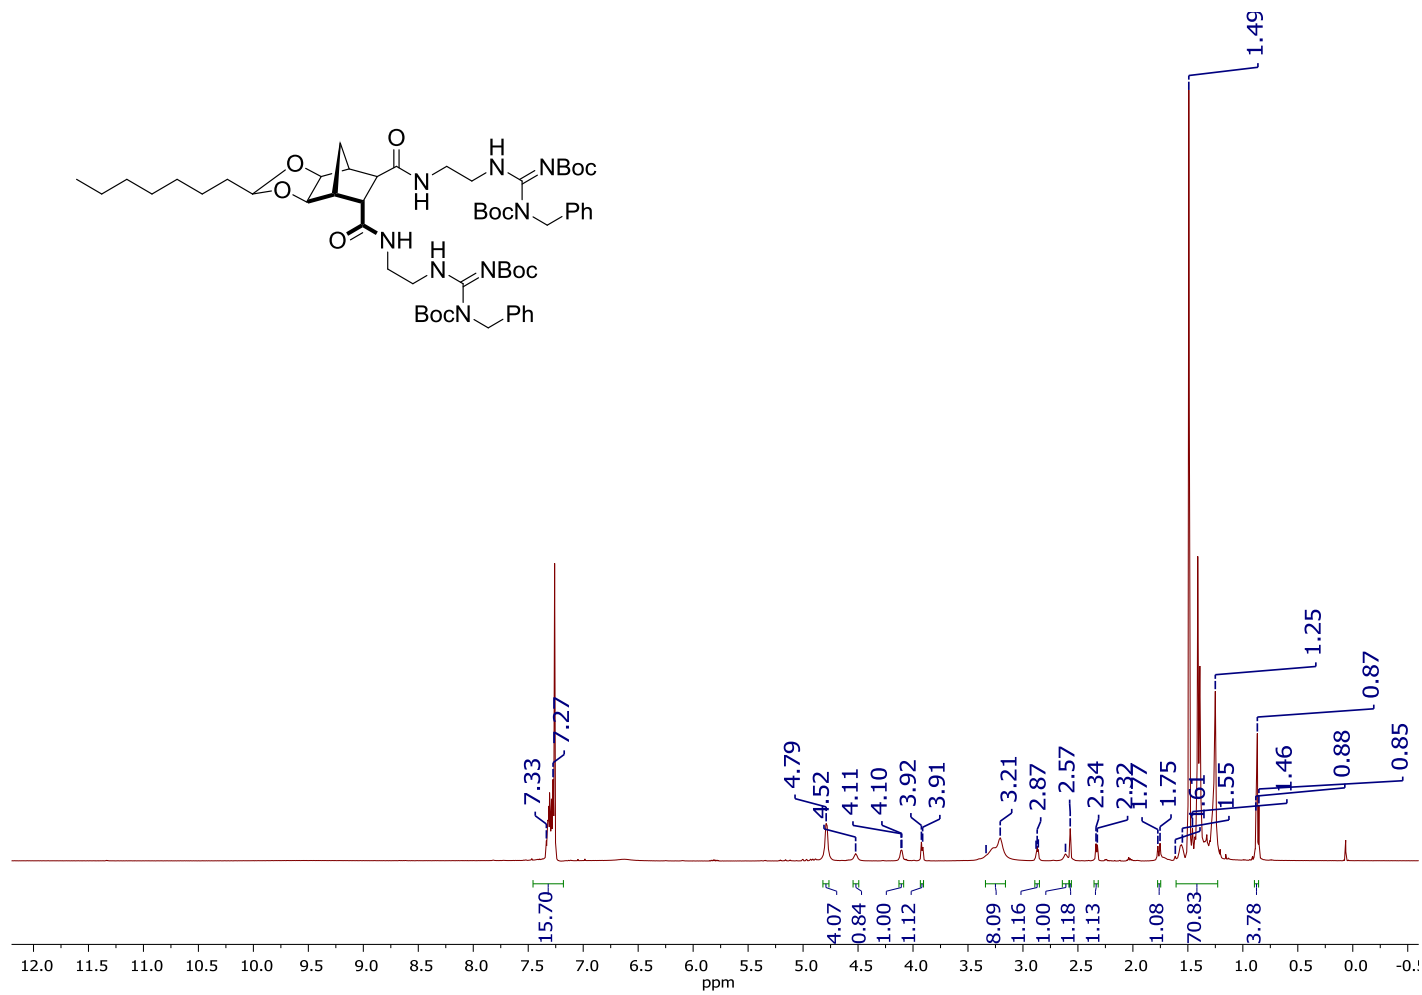

**Figure S3:** <sup>1</sup>H NMR spectrum of **6** in CDCl<sub>3</sub>.

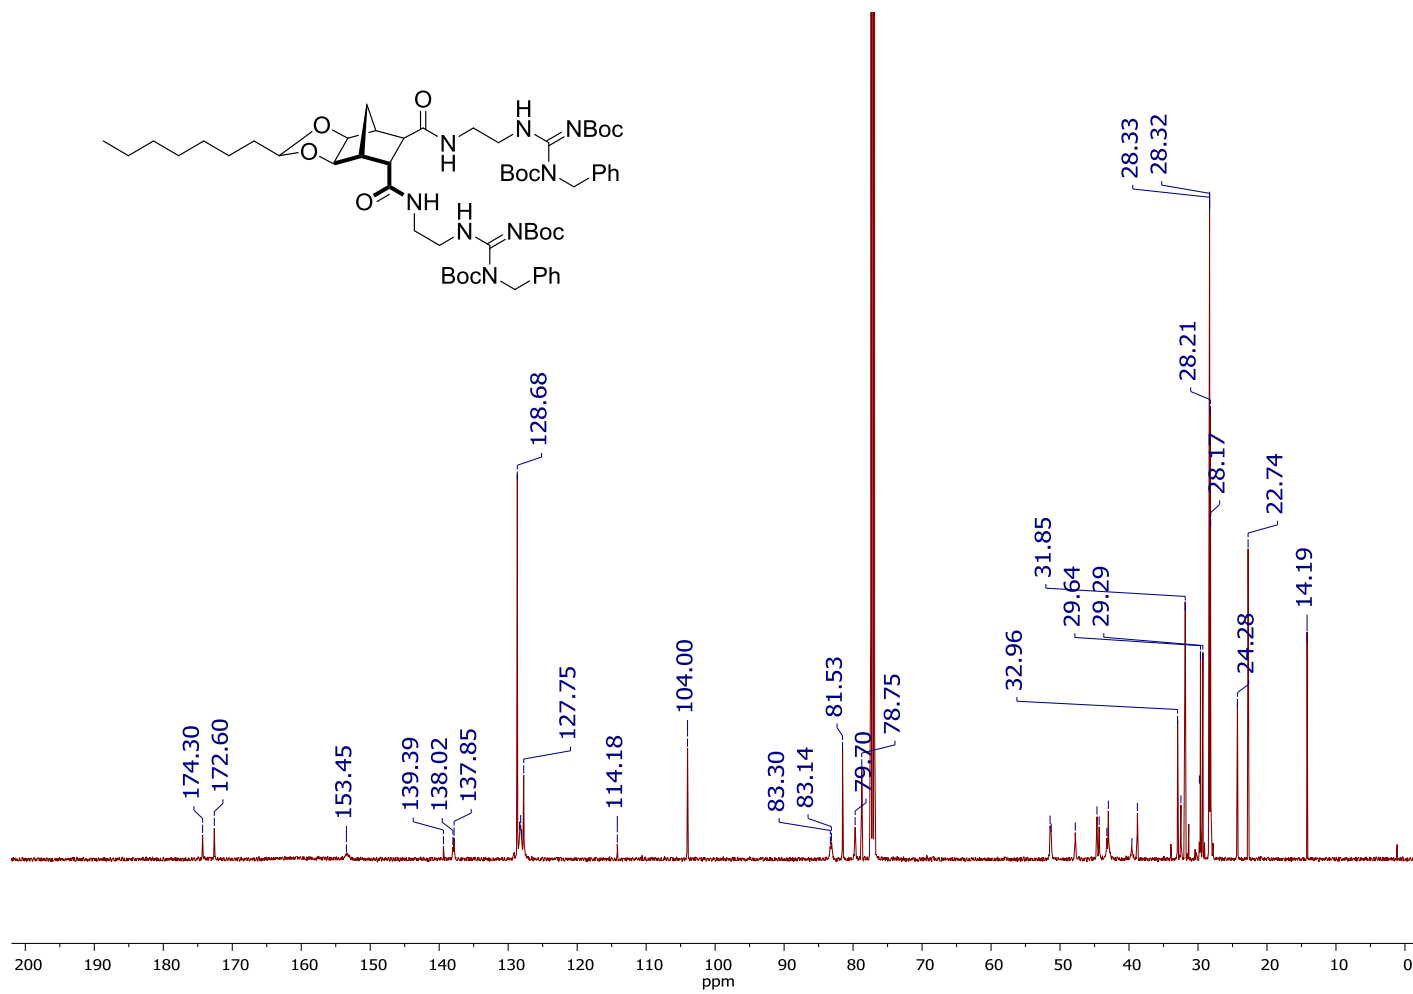

**Figure S4:**  $^{13}\text{C}$  NMR spectrum of **6** in  $\text{CDCl}_3$ .

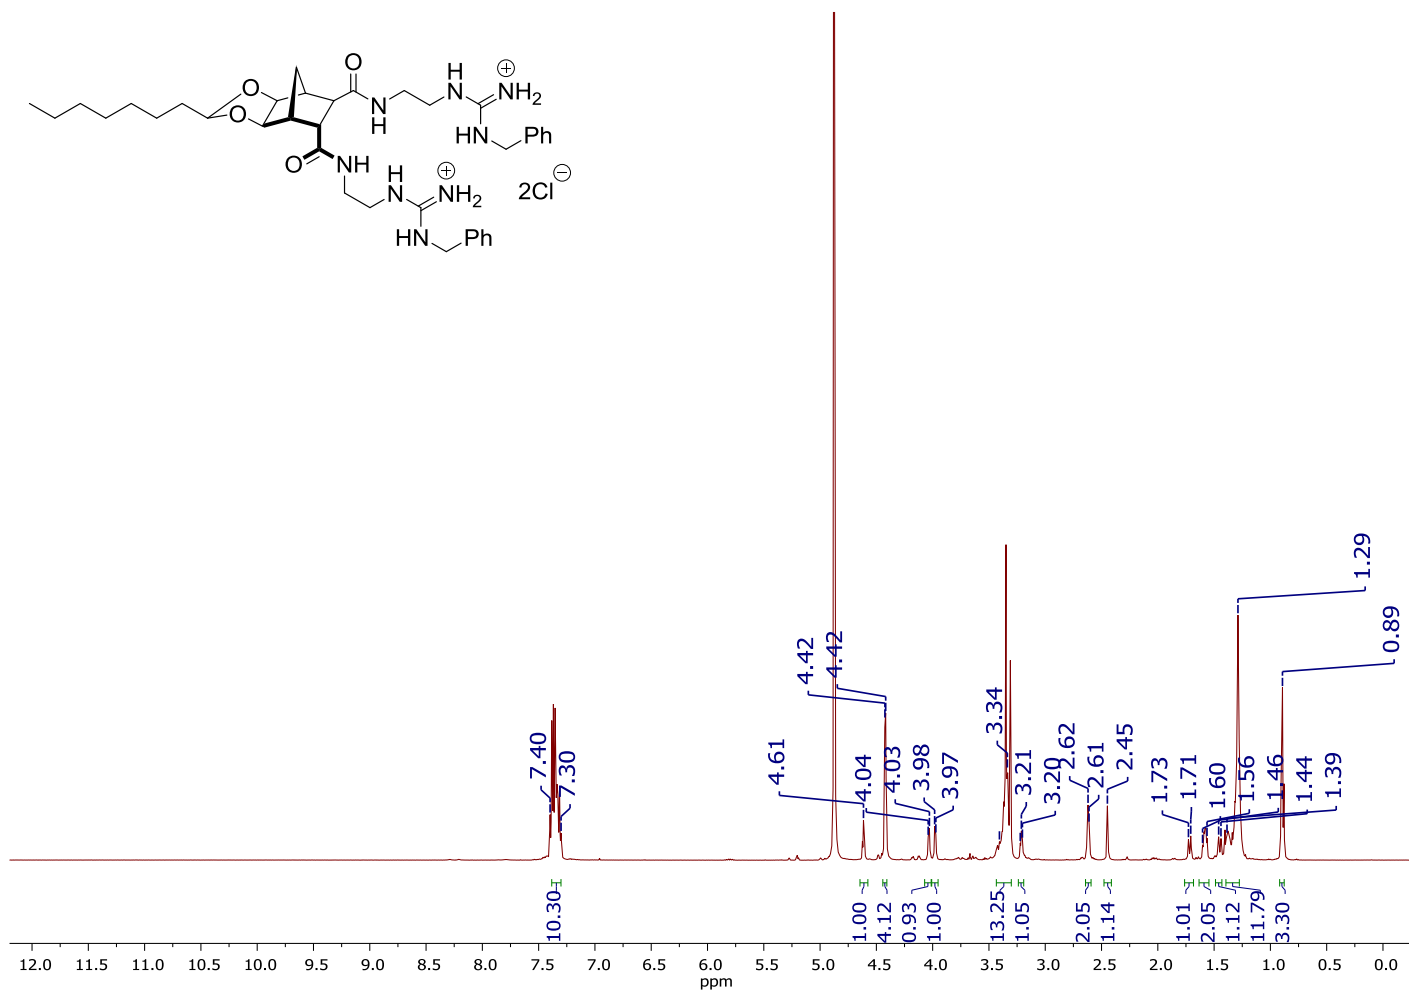

Figure S5: <sup>1</sup>H NMR spectrum of 7 in CD<sub>3</sub>OD.

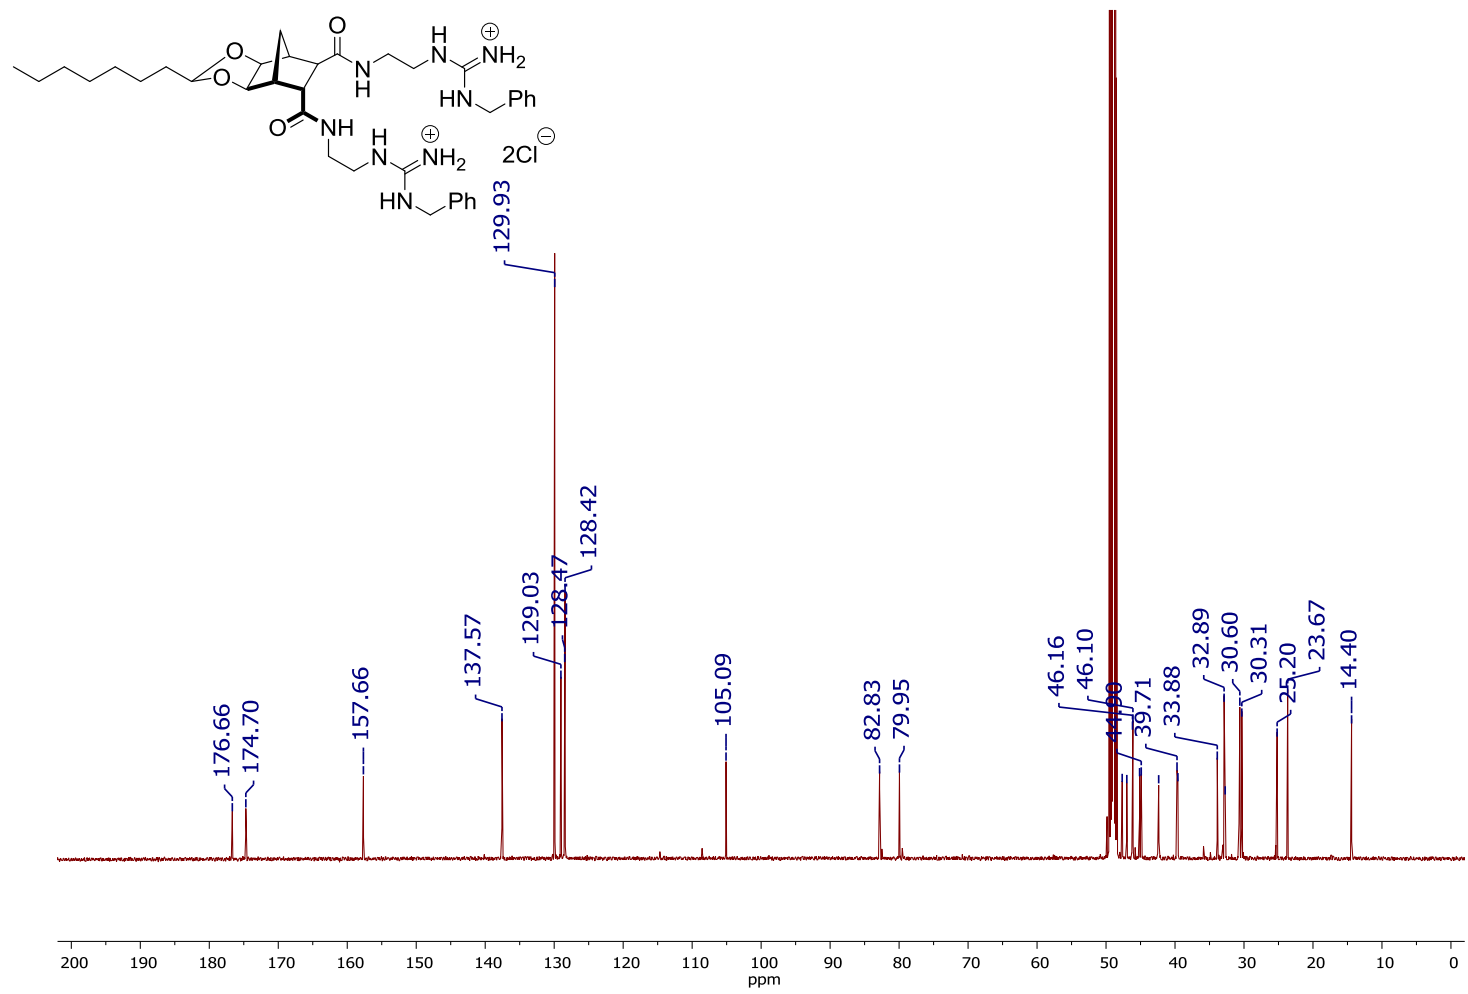

Figure S6:  $^{13}\text{C}$  NMR spectrum of 7 in  $\text{CD}_3\text{OD}$ .

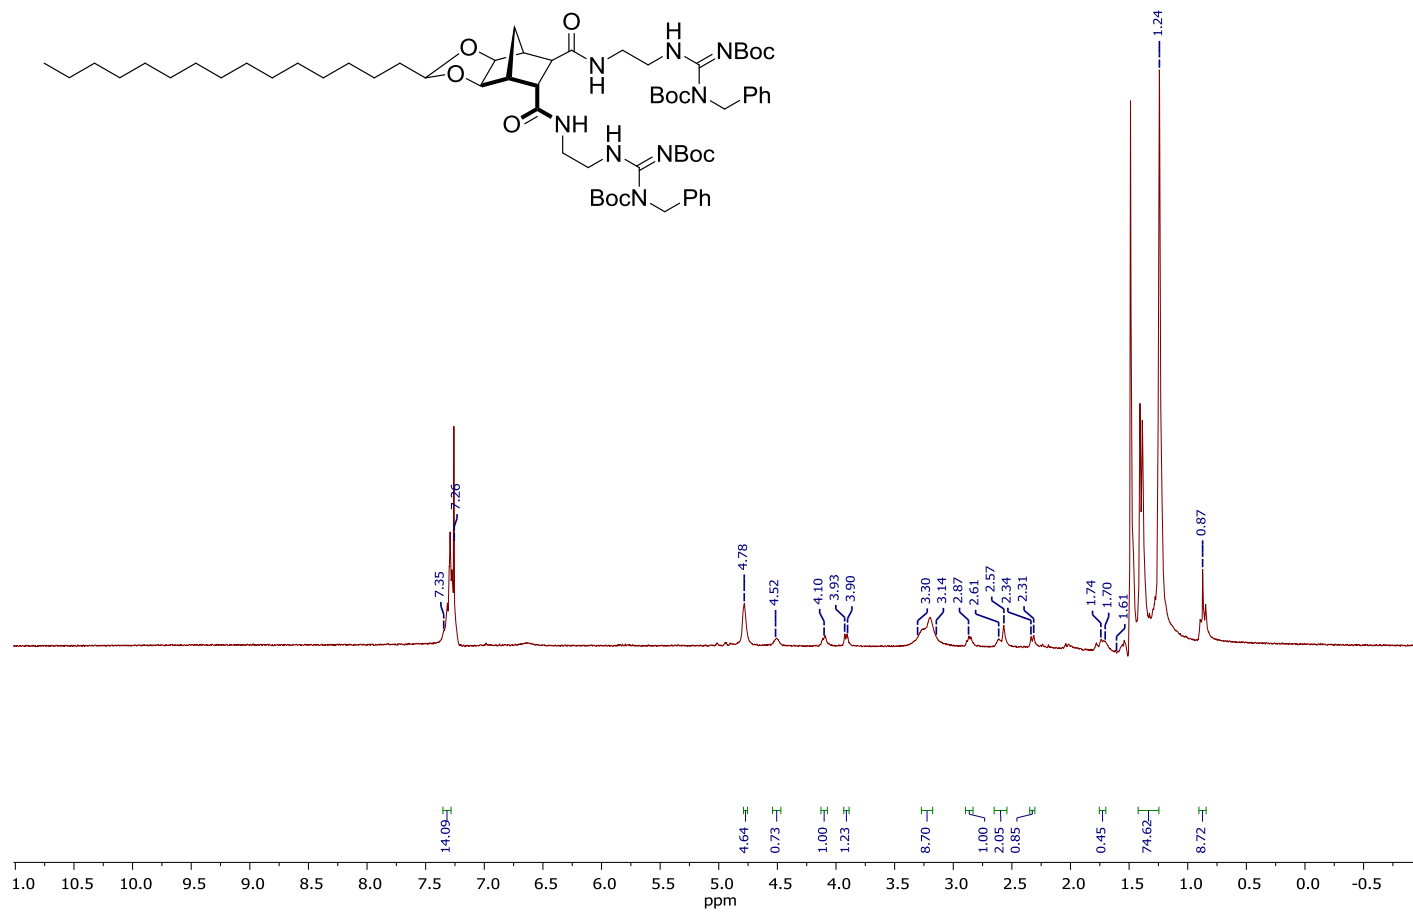

Figure S7:  $^1\text{H NMR}$  spectrum of **9** in  $\text{CDCl}_3$ .

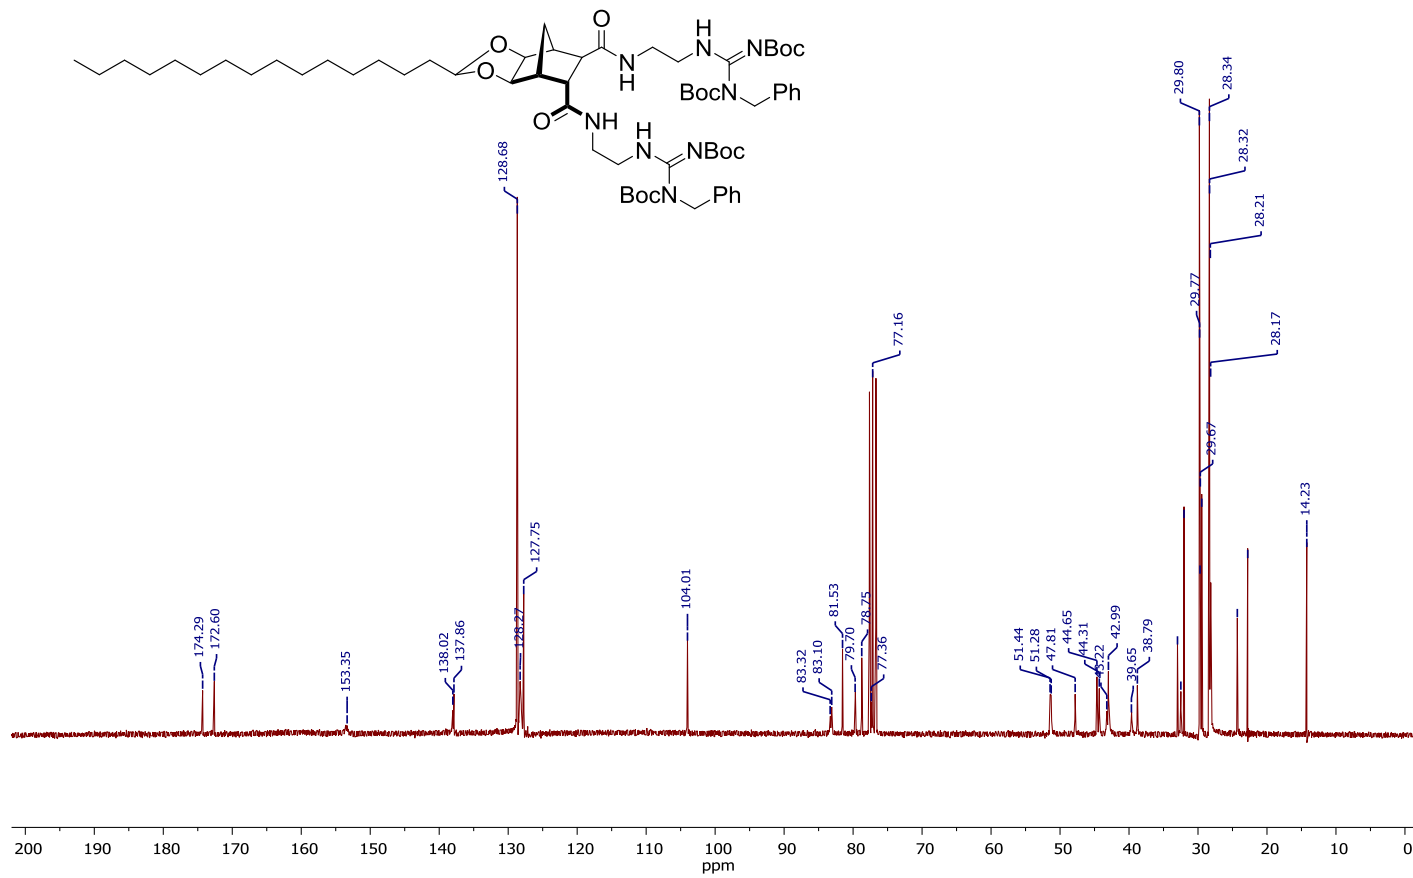

**Figure S8:**  $^{13}\text{C}$  NMR spectrum of **9** in CDCl<sub>3</sub>.

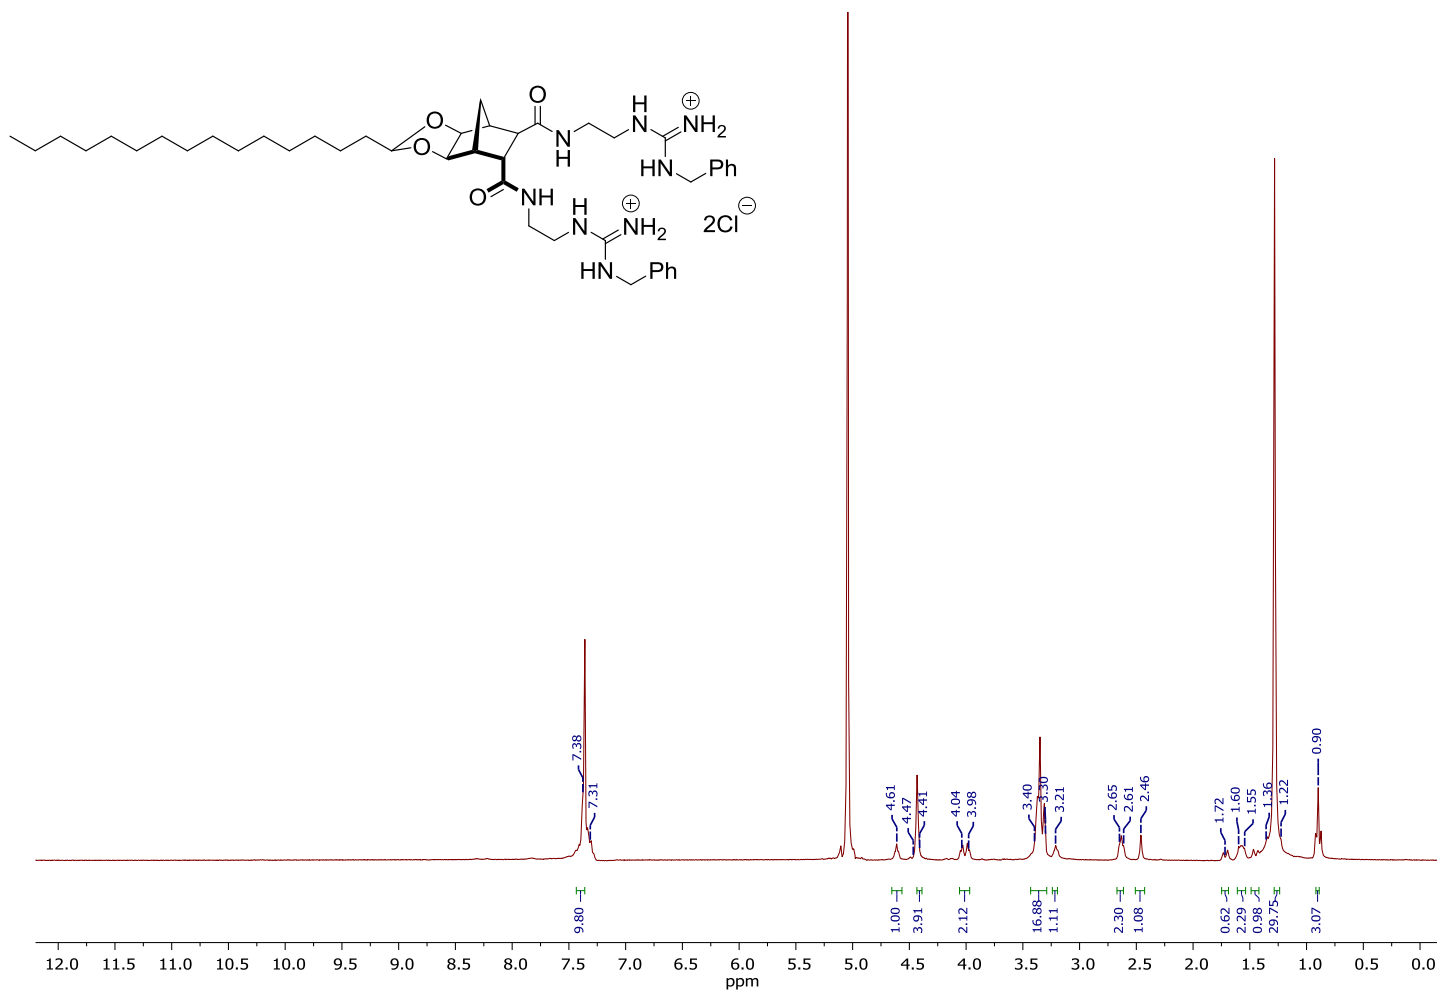

Figure S9: <sup>1</sup>H NMR spectrum of **10** in CD<sub>3</sub>OD.

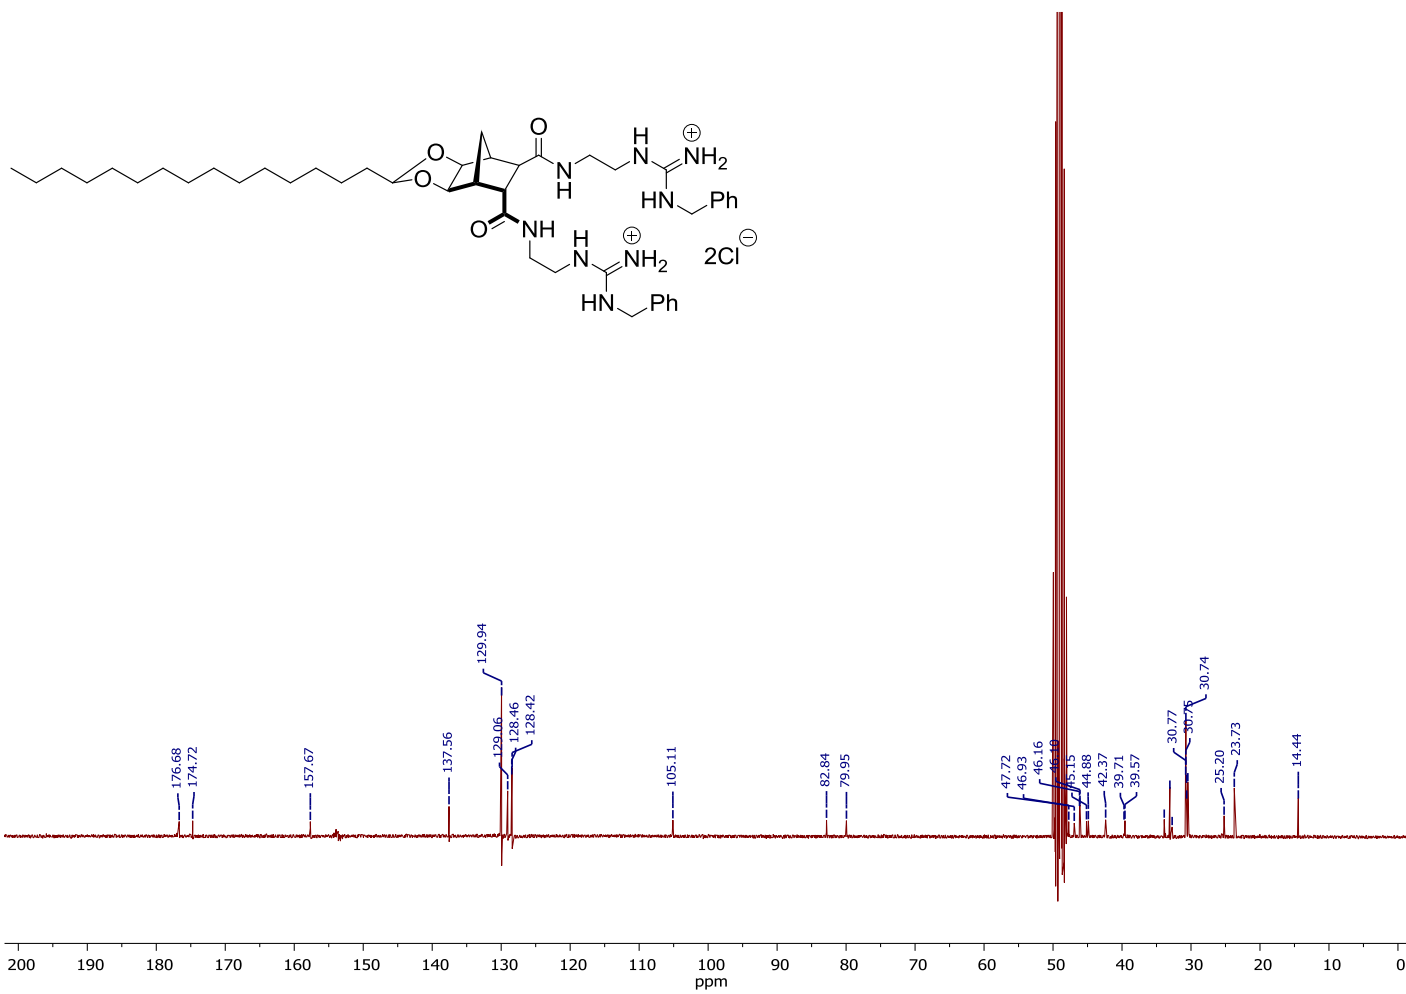

**Figure S10:** <sup>13</sup>C NMR spectrum of **10** in CD<sub>3</sub>OD.



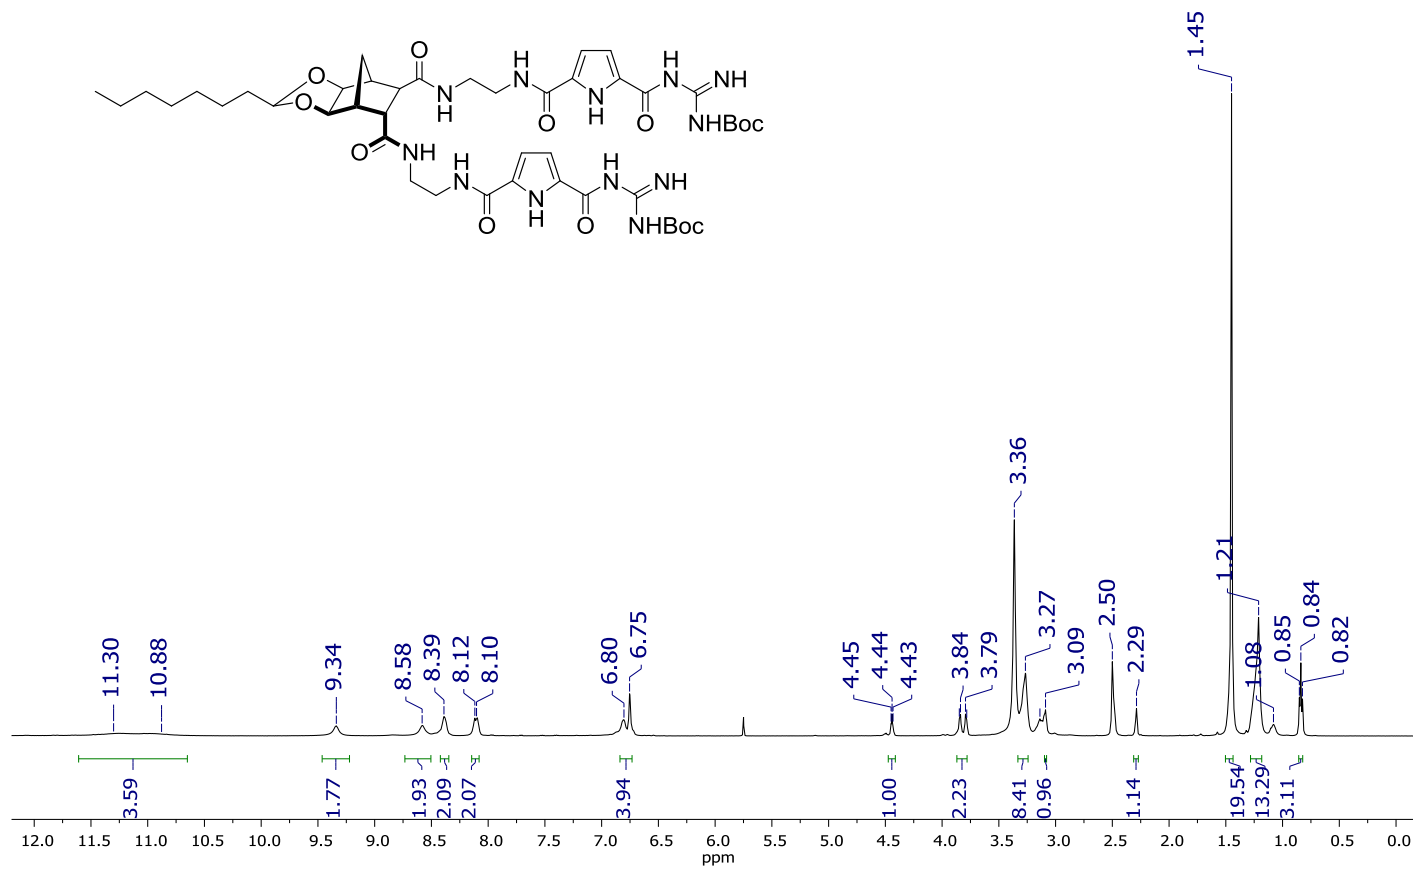

**Figure S11:** <sup>1</sup>H NMR spectrum of **12** in DMSO-*d*<sub>6</sub>.

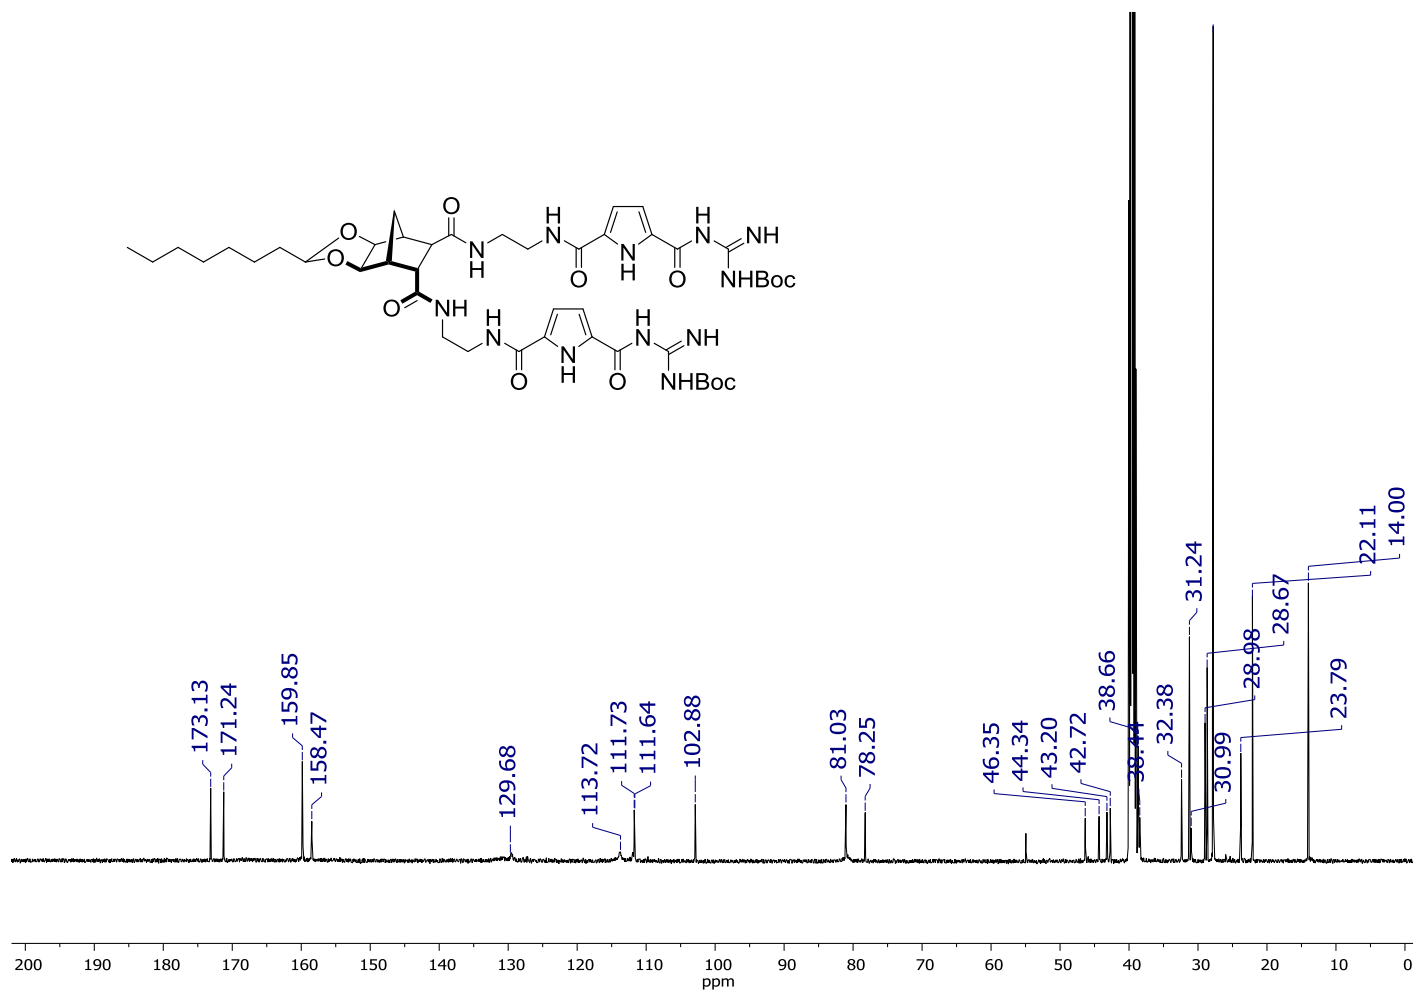

**Figure S12:** <sup>13</sup>C NMR spectrum of **12** in DMSO-*d*<sub>6</sub>.

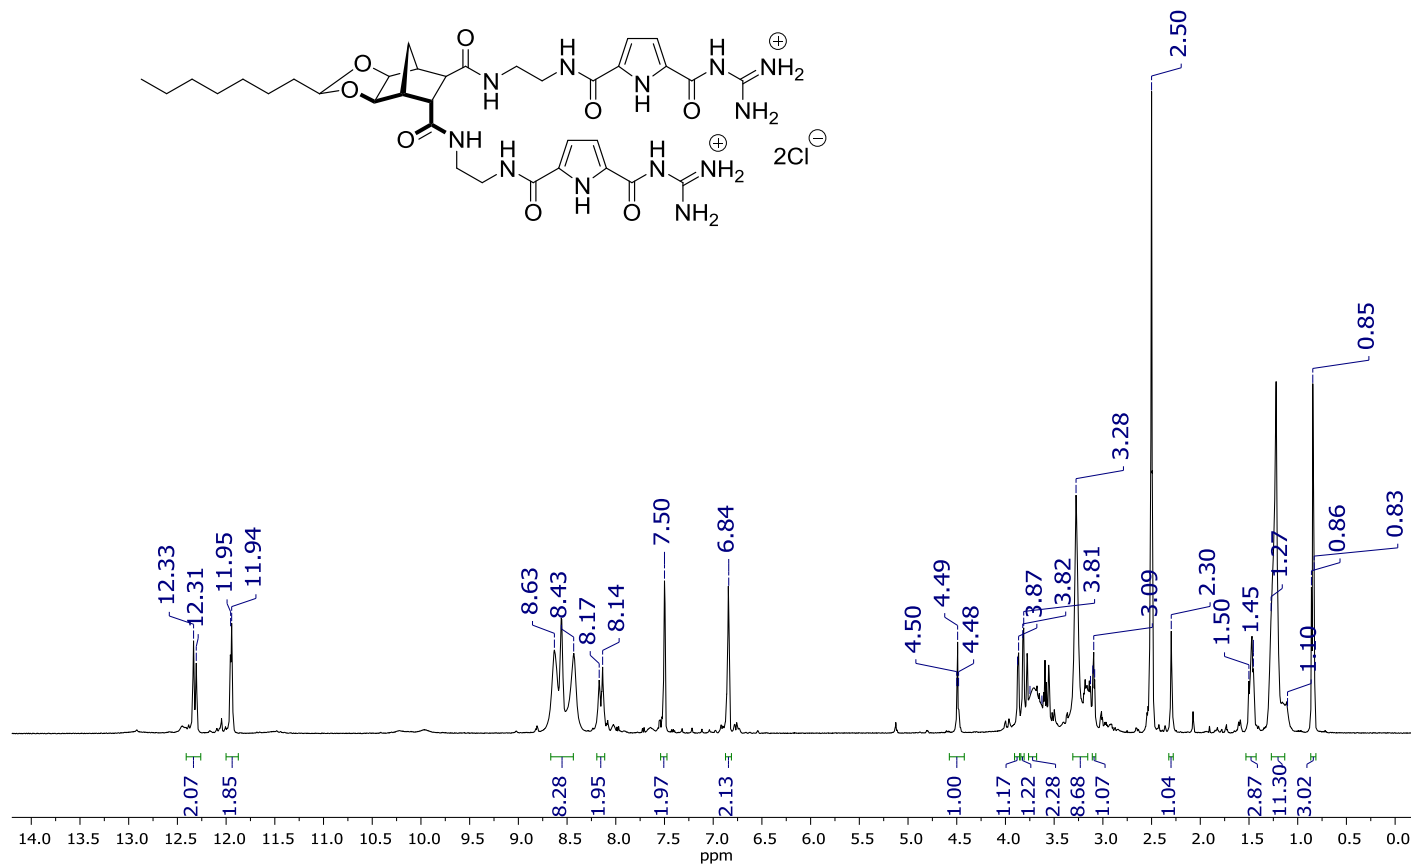

**Figure S13:** <sup>1</sup>H NMR spectrum of **13** in DMSO-*d*<sub>6</sub>.

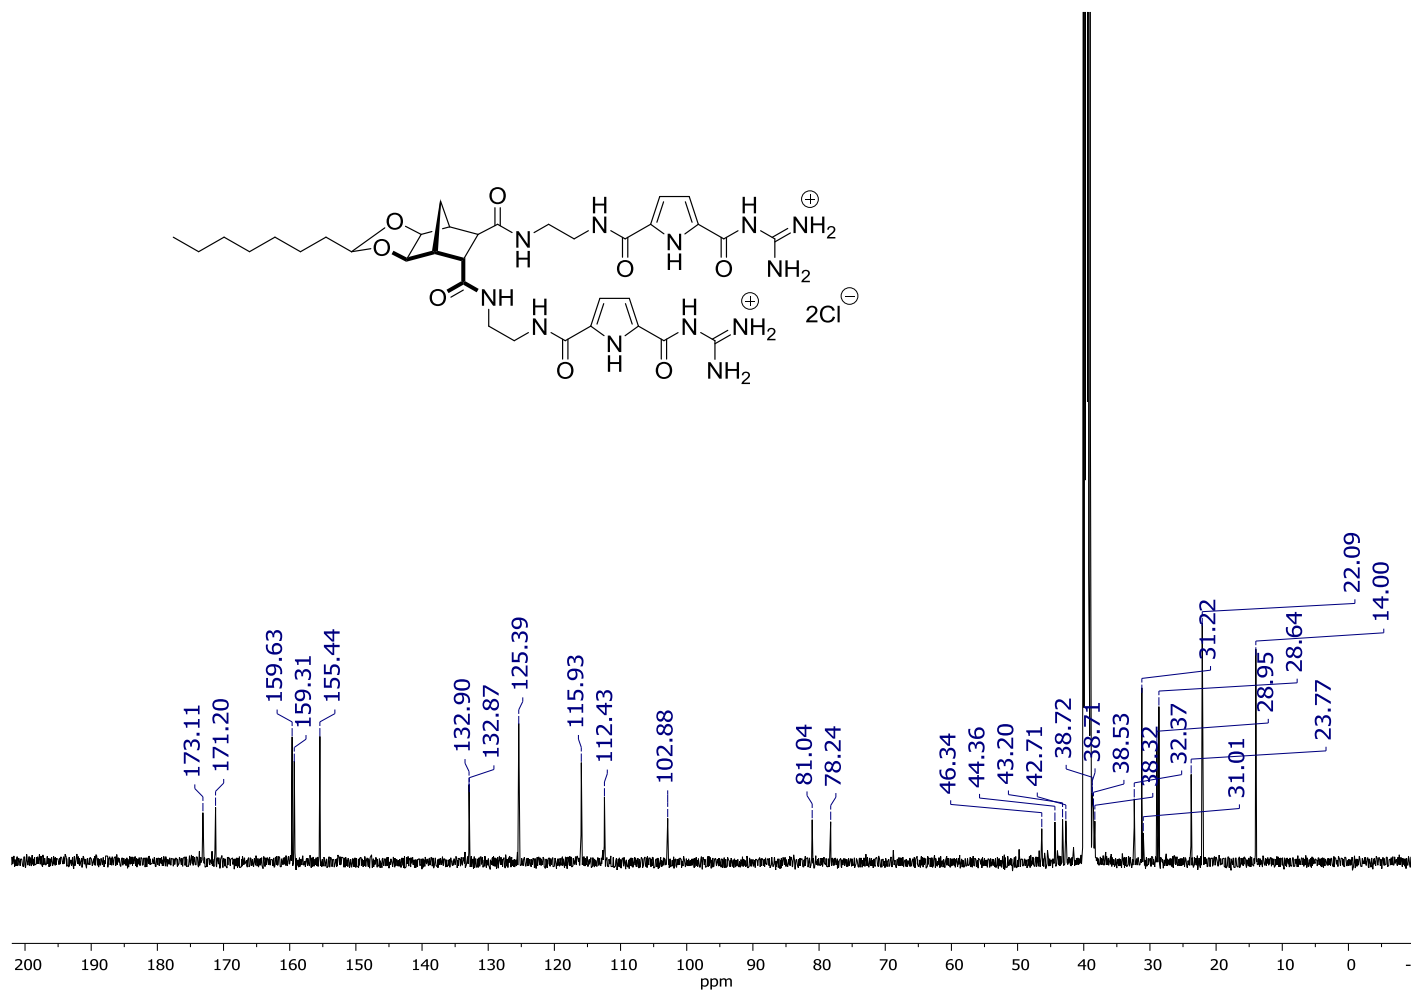

**Figure S14:**  $^{13}\text{C}$  NMR spectrum of **13** in  $\text{DMSO-}d_6$ .

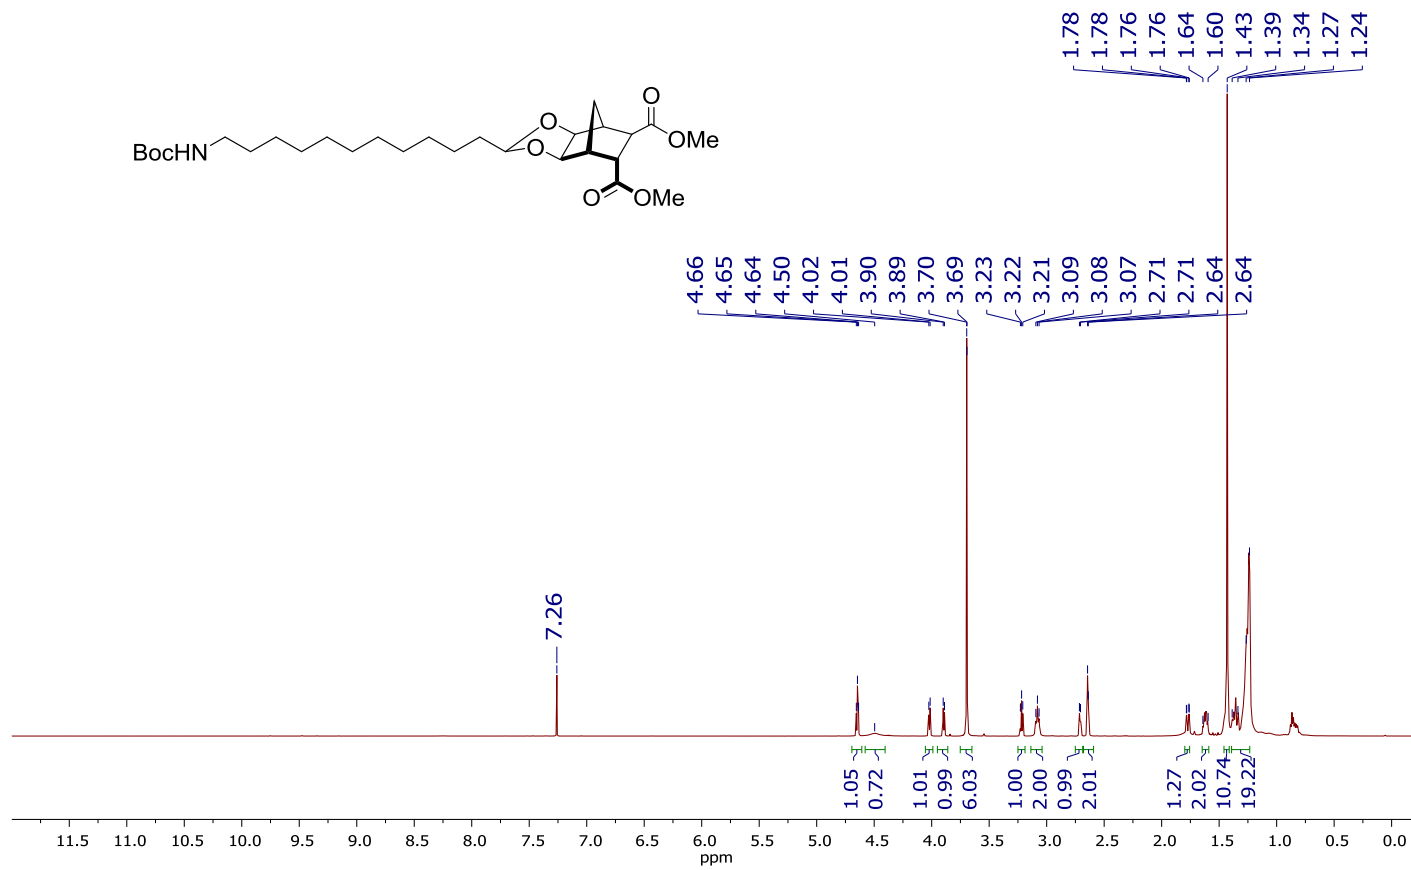

Figure S15: <sup>1</sup>H NMR spectrum of **18** in CDCl<sub>3</sub>.

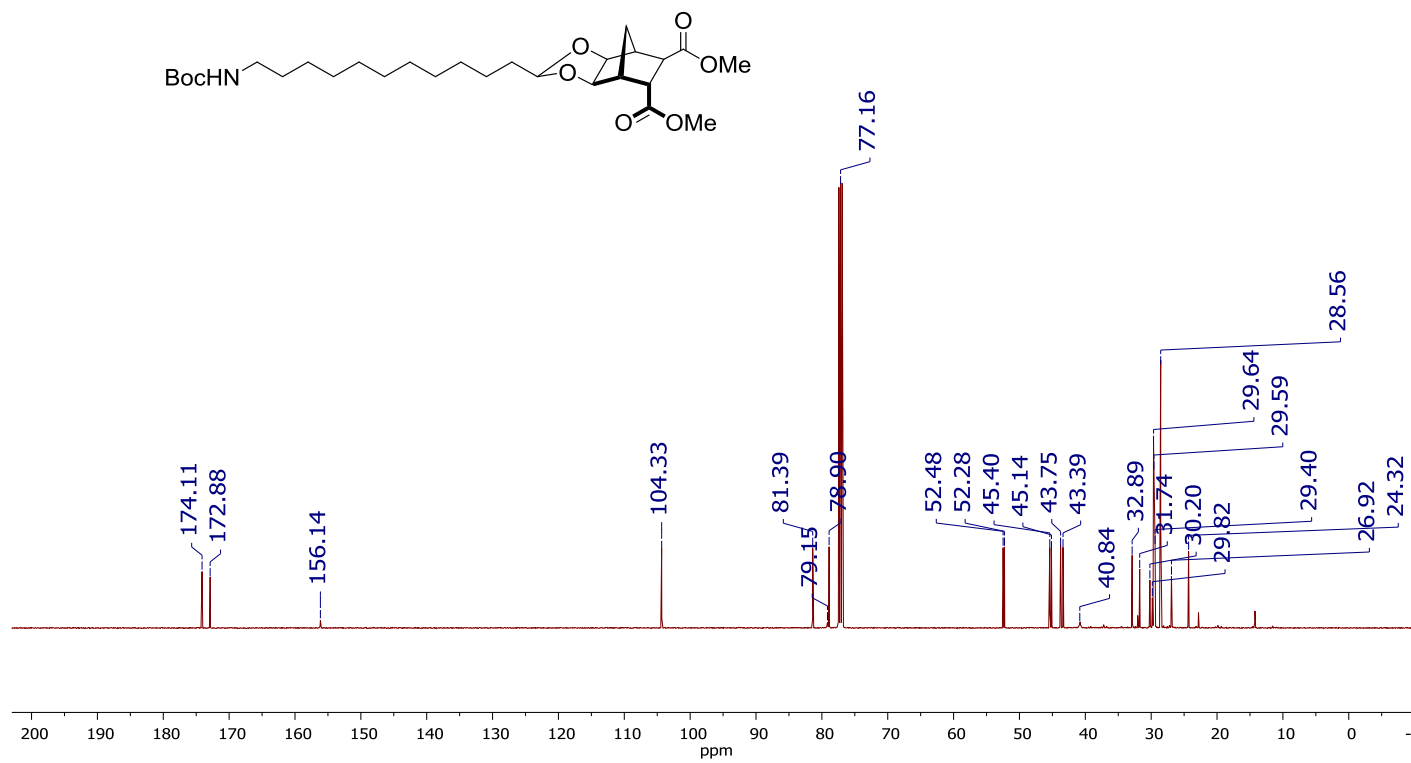

**Figure S16:**  $^{13}\text{C}$  NMR spectrum of **18** in  $\text{CDCl}_3$ .

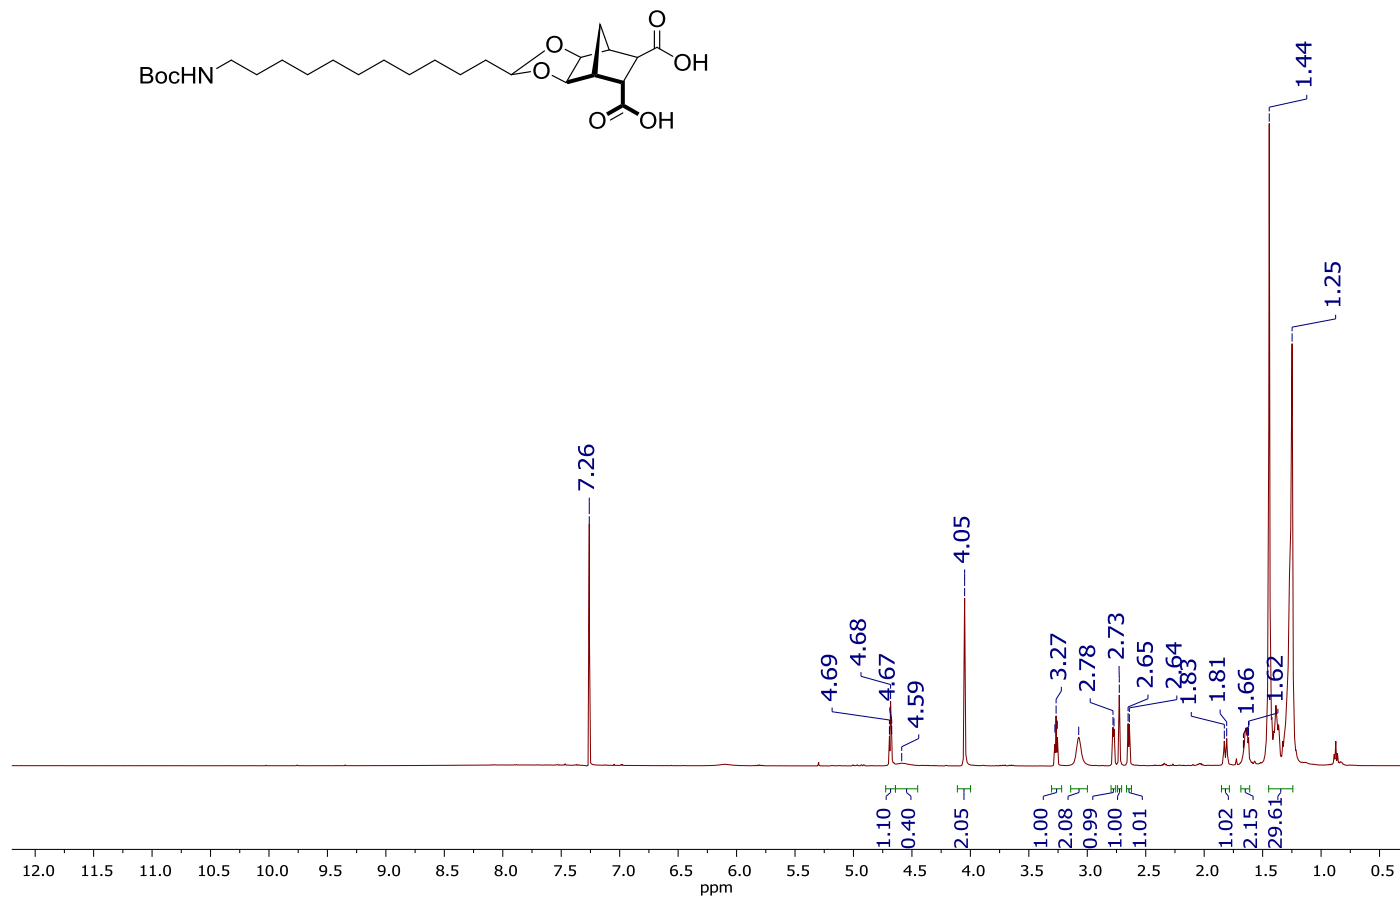

Figure S17:  $^1\text{H}$  NMR spectrum of **19** in  $\text{CDCl}_3$ .

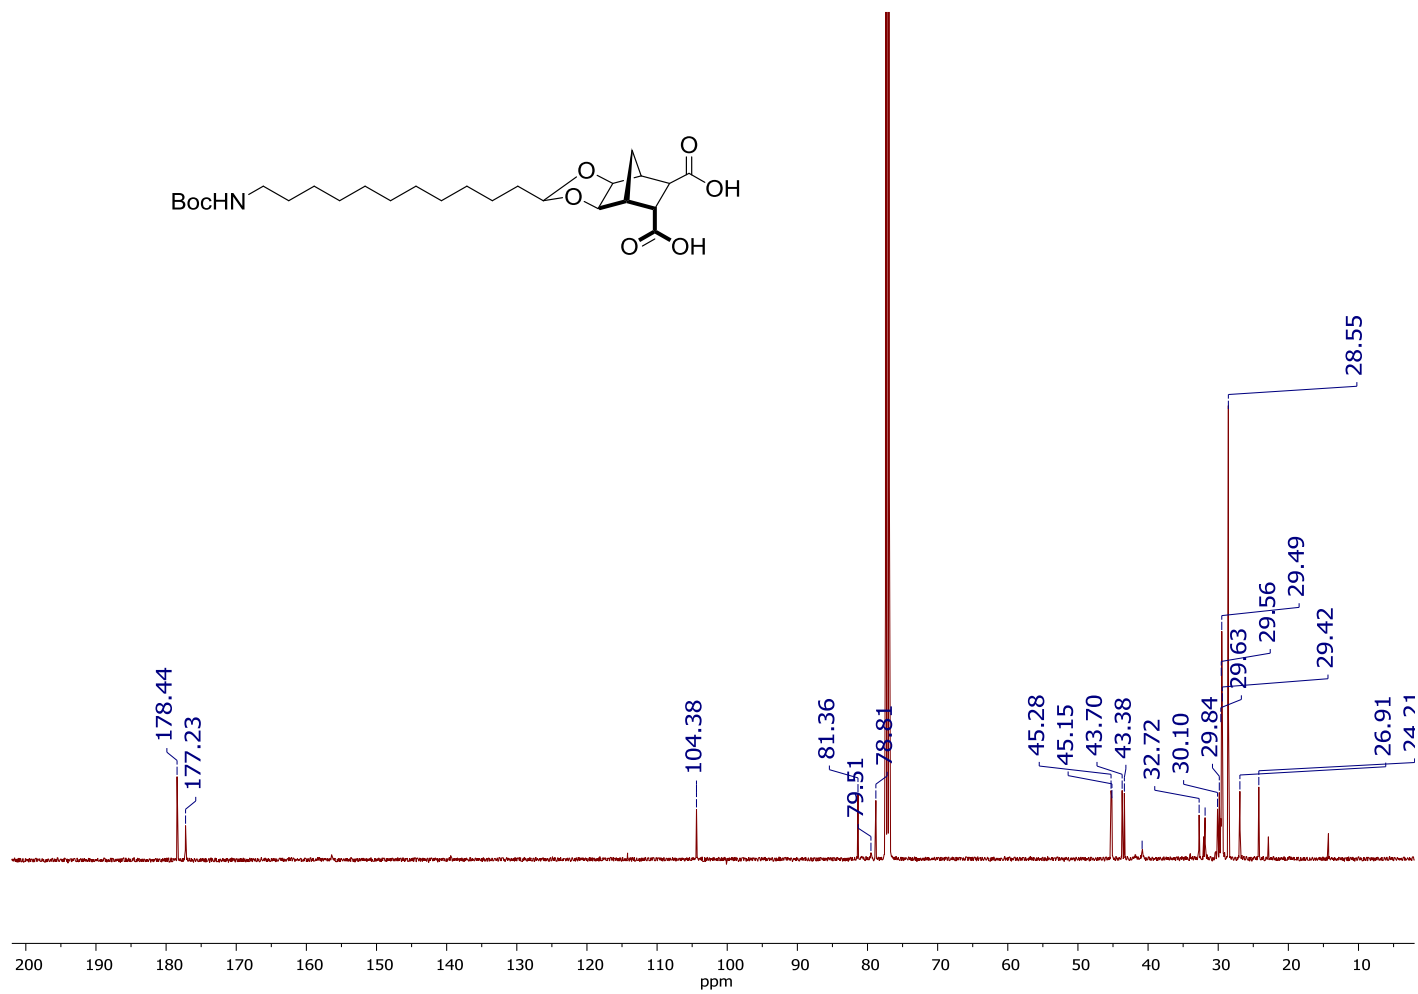

**Figure S18:** <sup>13</sup>C NMR spectrum of **19** in CDCl<sub>3</sub>.



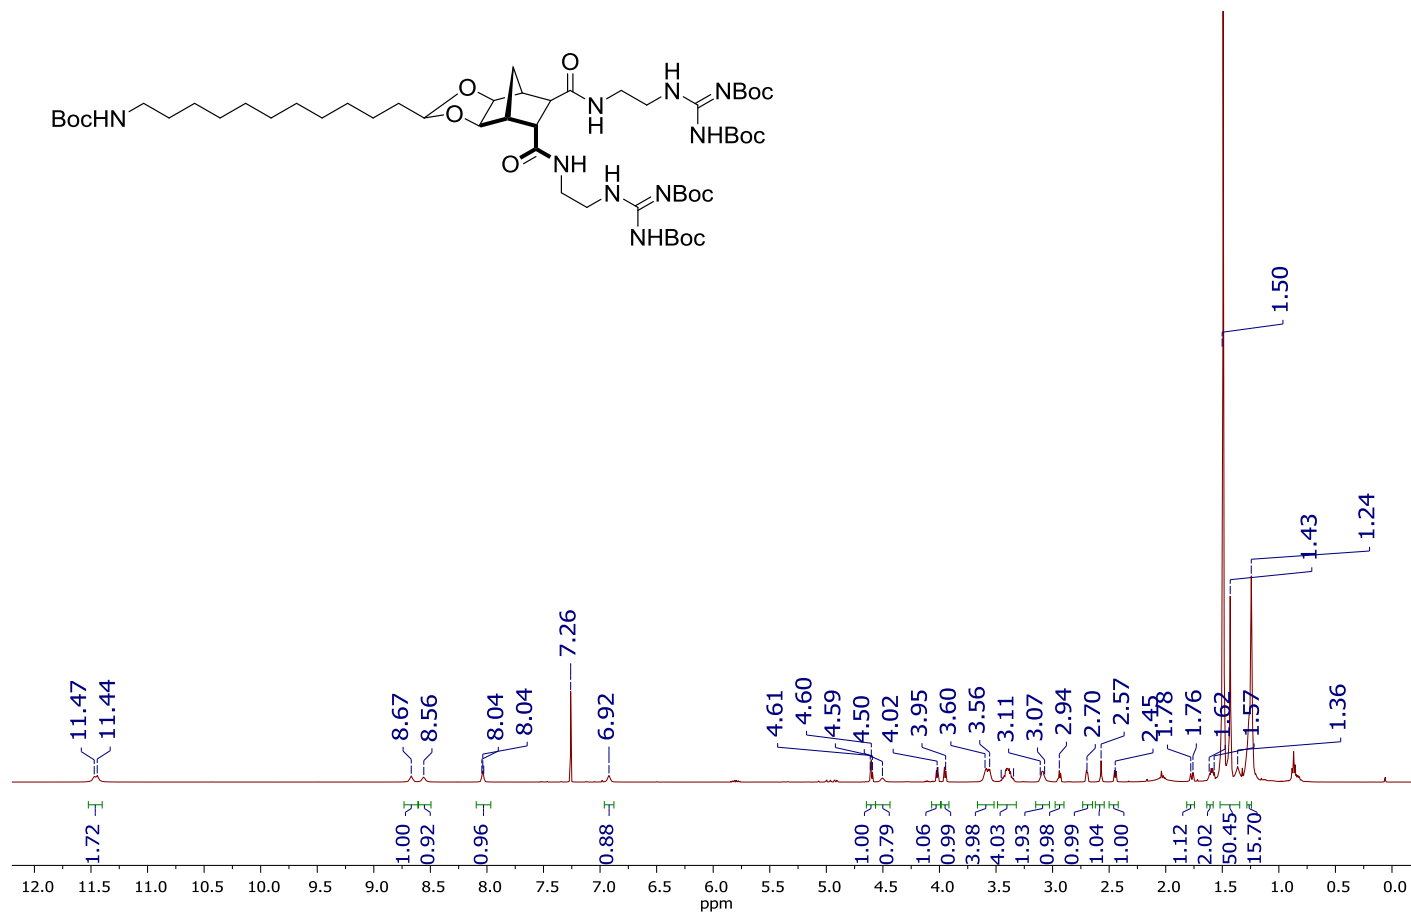

Figure S19: <sup>1</sup>H NMR spectrum of **20** in CDCl<sub>3</sub>

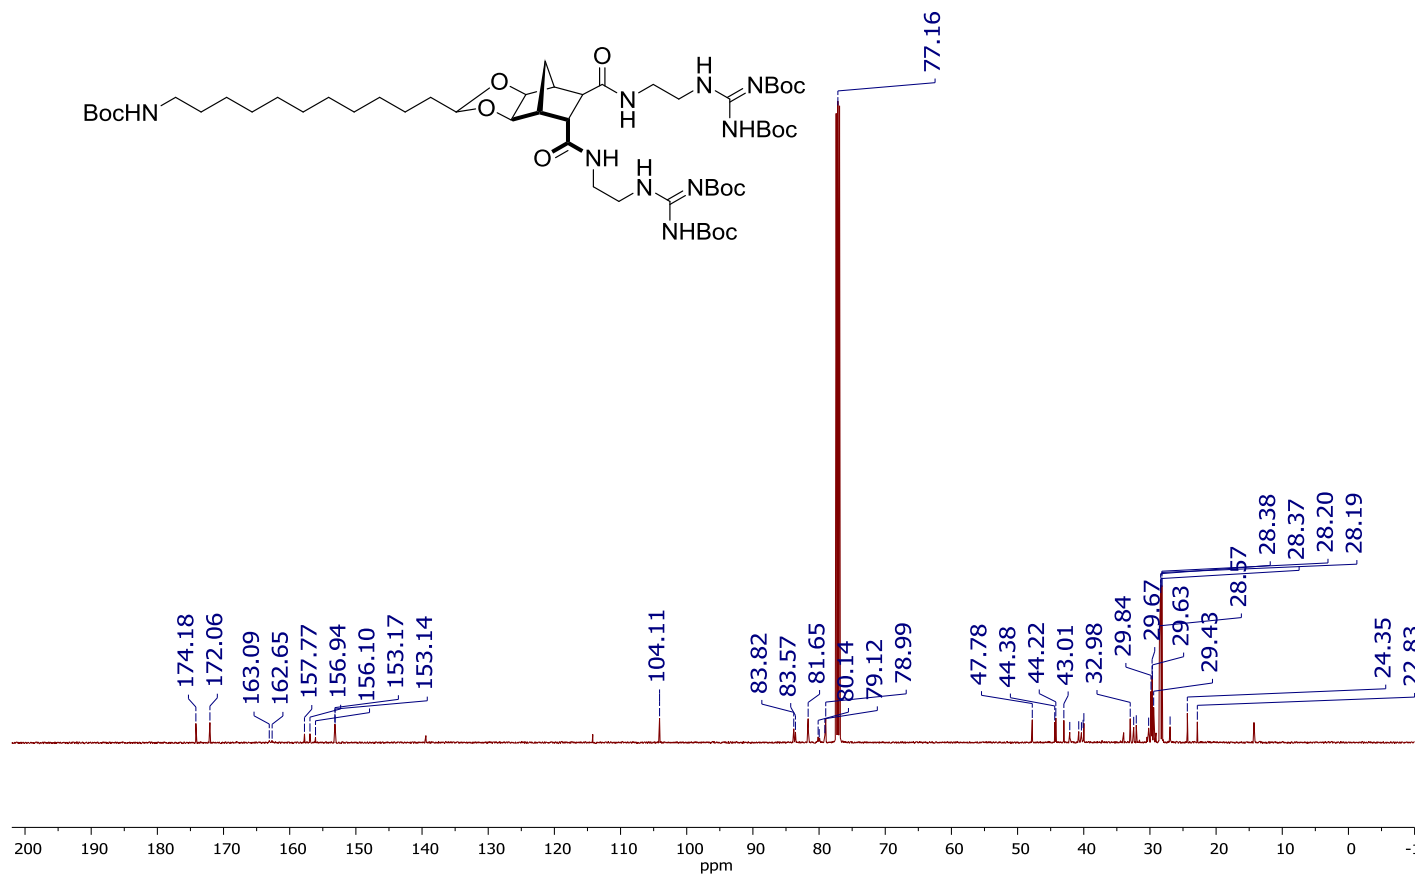

Figure S20: <sup>13</sup>C NMR spectrum of **20** in CDCl<sub>3</sub>

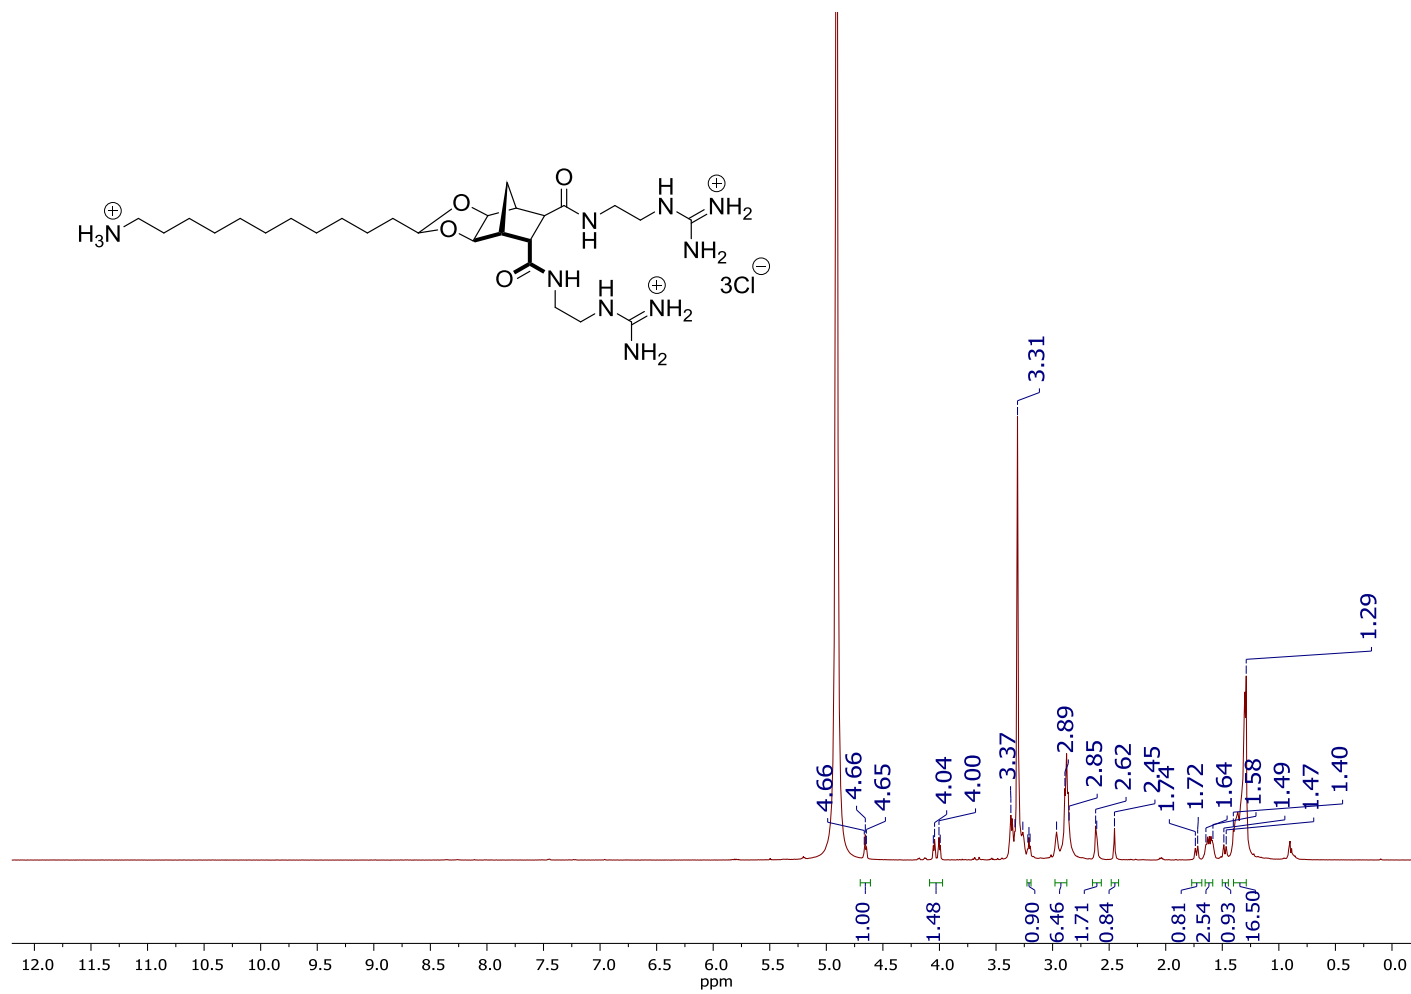

**Figure S21:**  $^1\text{H}$  NMR spectrum of **21** in  $\text{CD}_3\text{OD}$ .

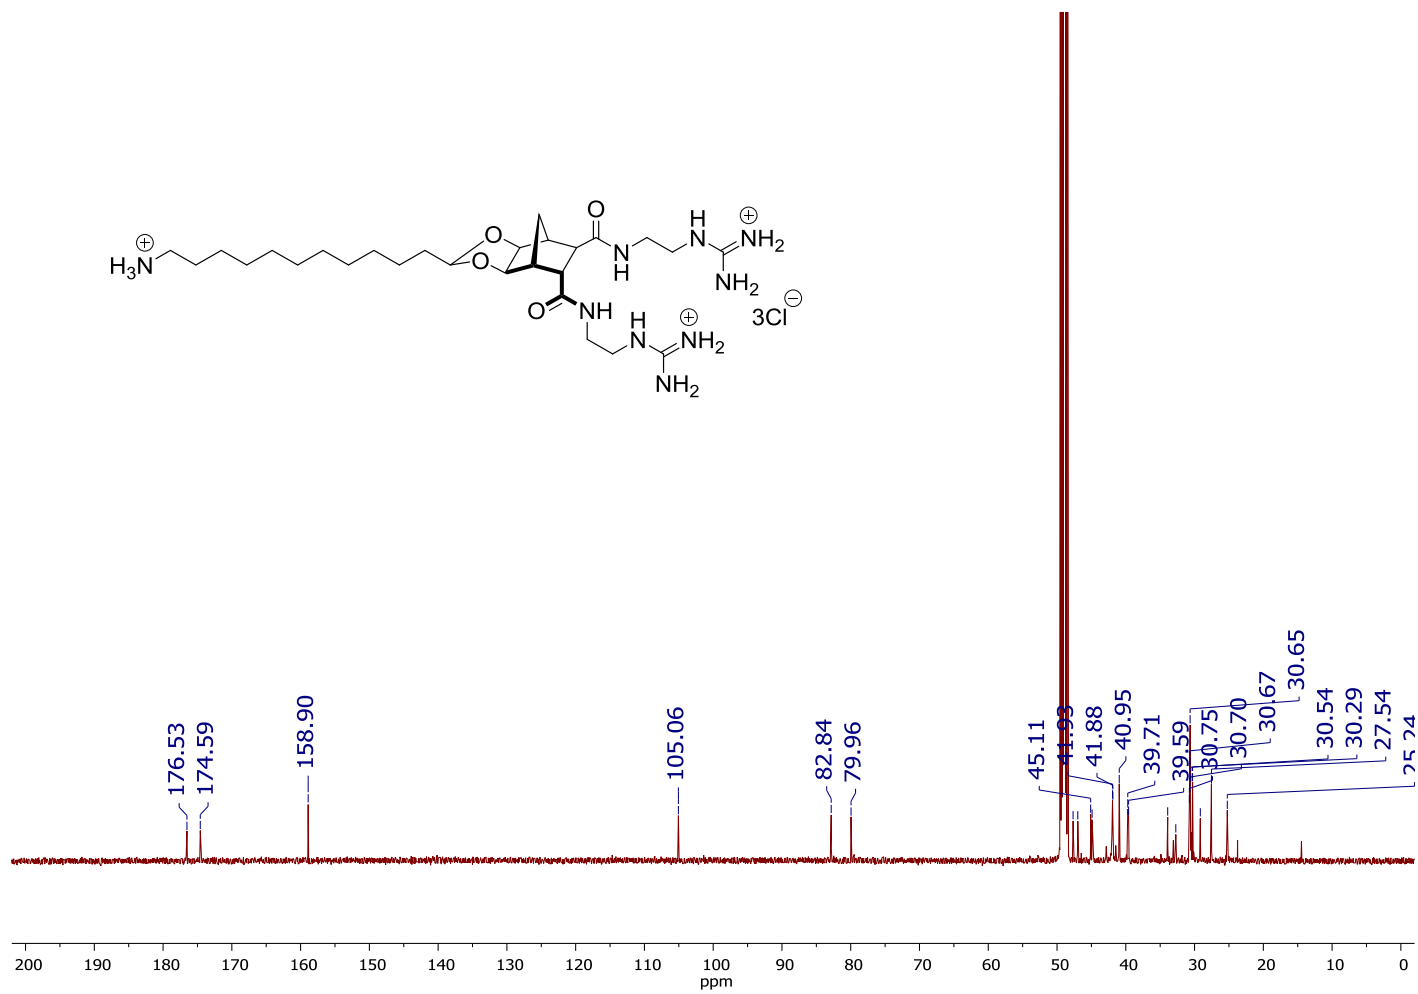

**Figure S22:**  $^{13}\text{C}$  NMR spectrum of **21** in  $\text{CD}_3\text{OD}$ .

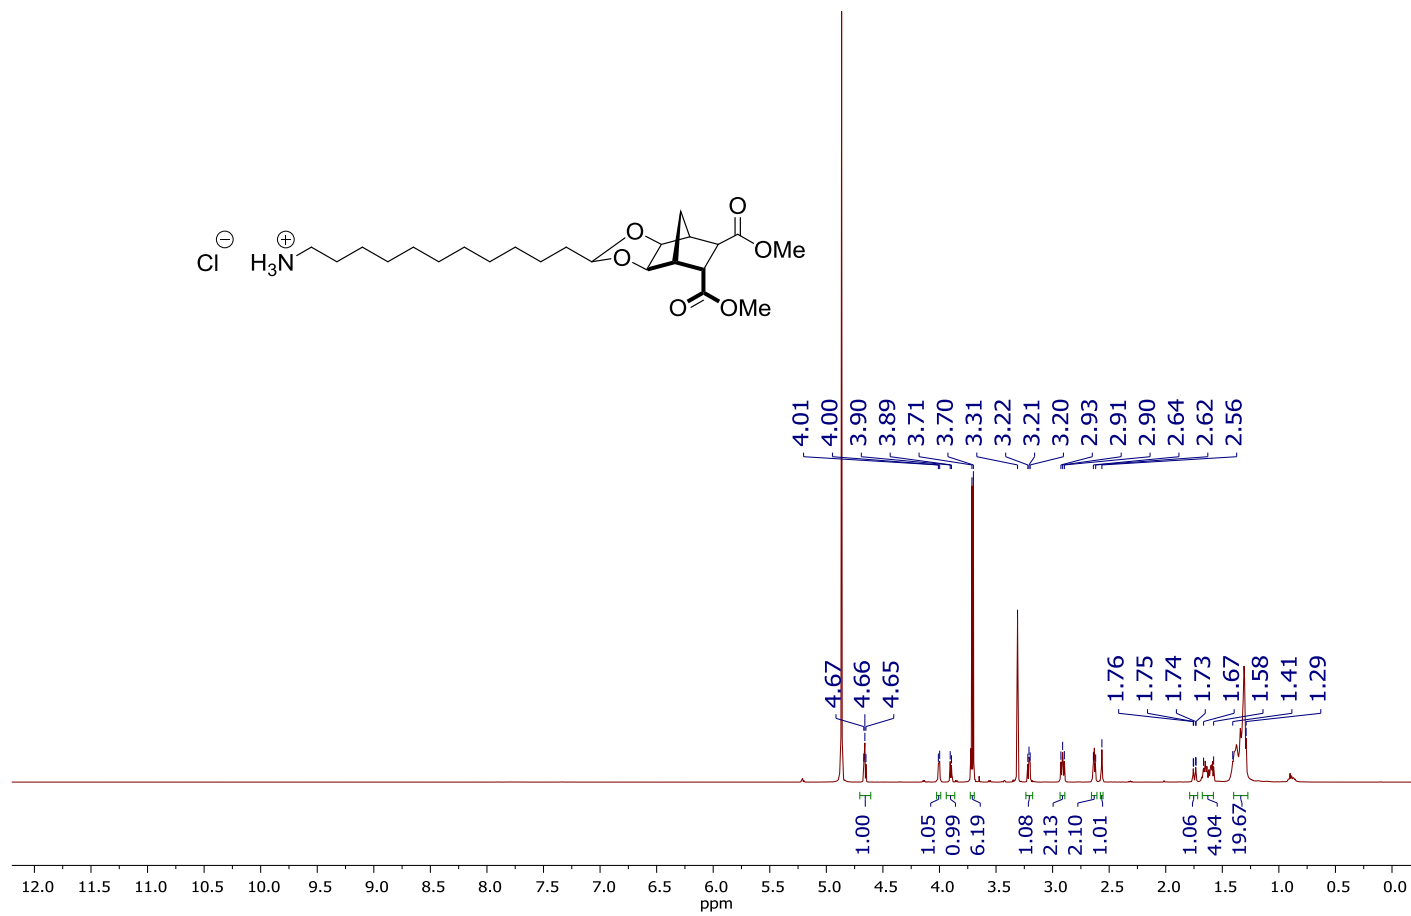

**Figure S23:**  $^1\text{H}$  NMR spectrum of **23** in  $\text{CD}_3\text{OD}$ .

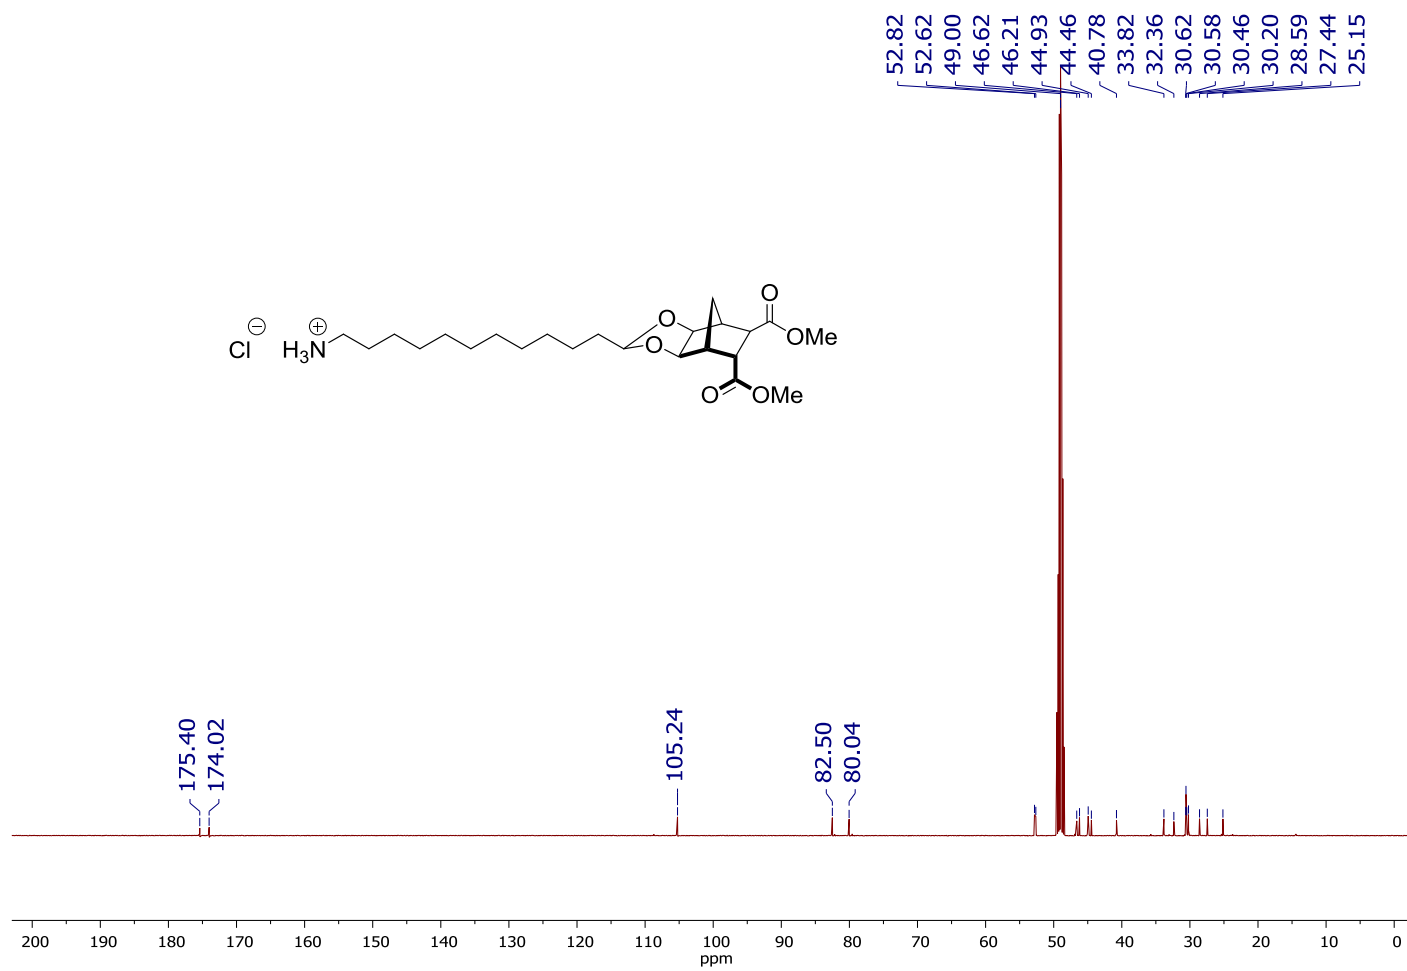

**Figure S24:** <sup>13</sup>C NMR spectrum of **23** in CD<sub>3</sub>OD.

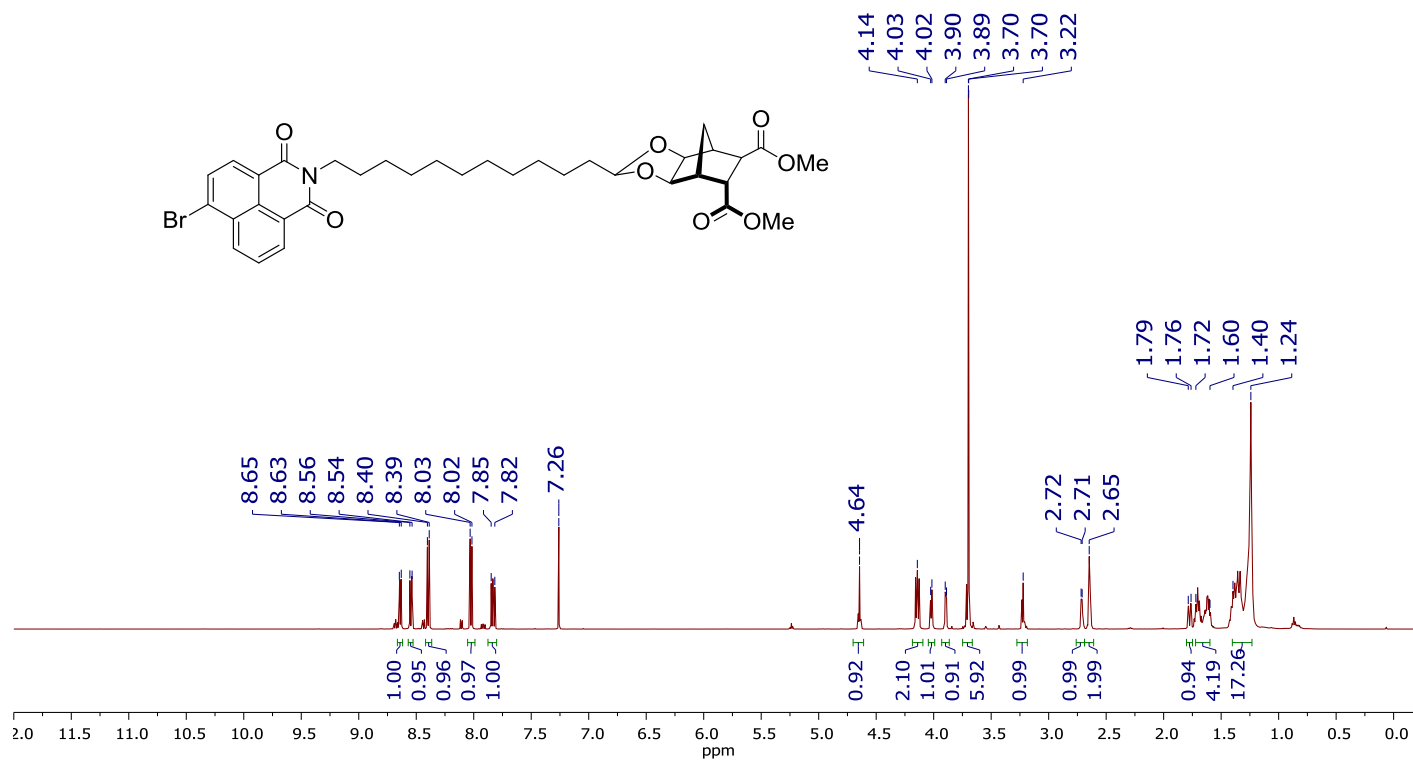

Figure S25:  $^1\text{H}$  NMR spectrum of **25** in CDCl<sub>3</sub>.

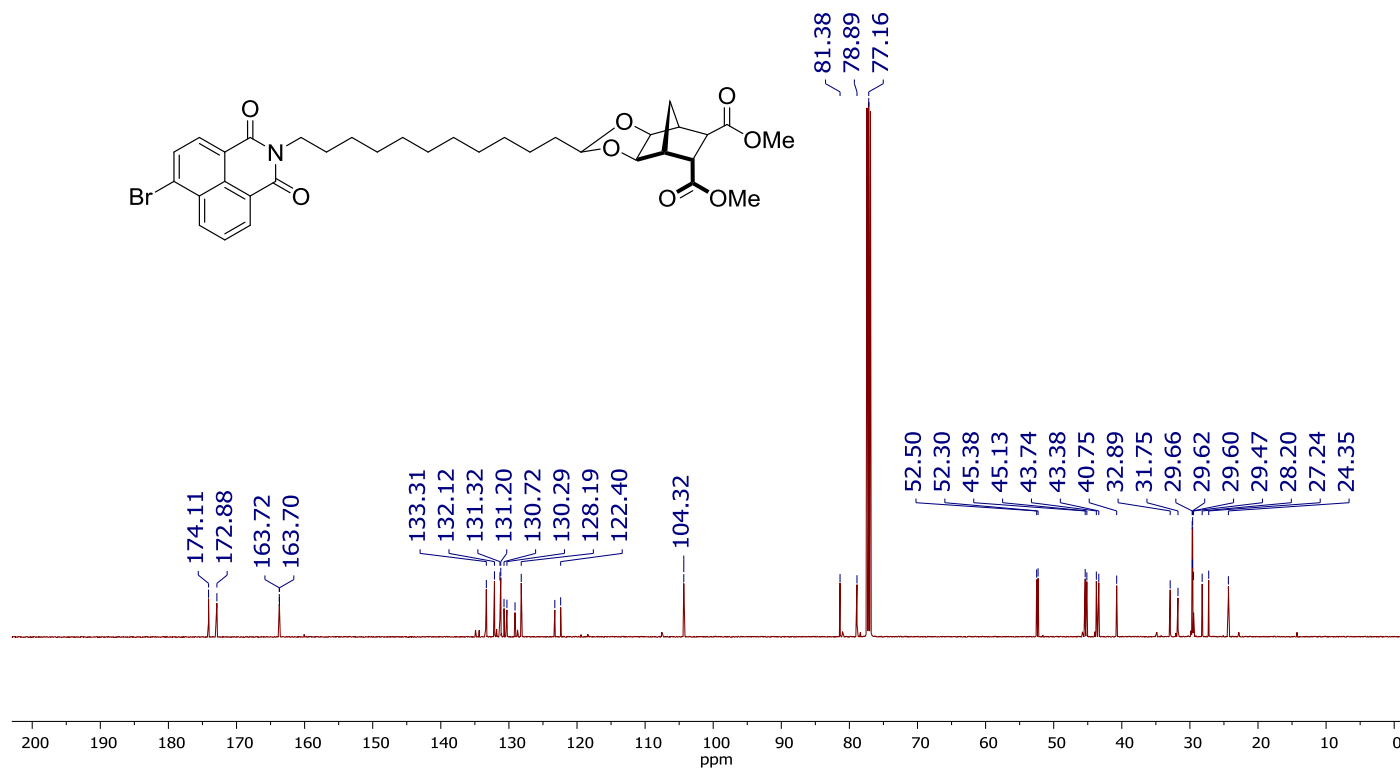

**Figure S26:** <sup>13</sup>C NMR spectrum of **25** in CDCl<sub>3</sub>.



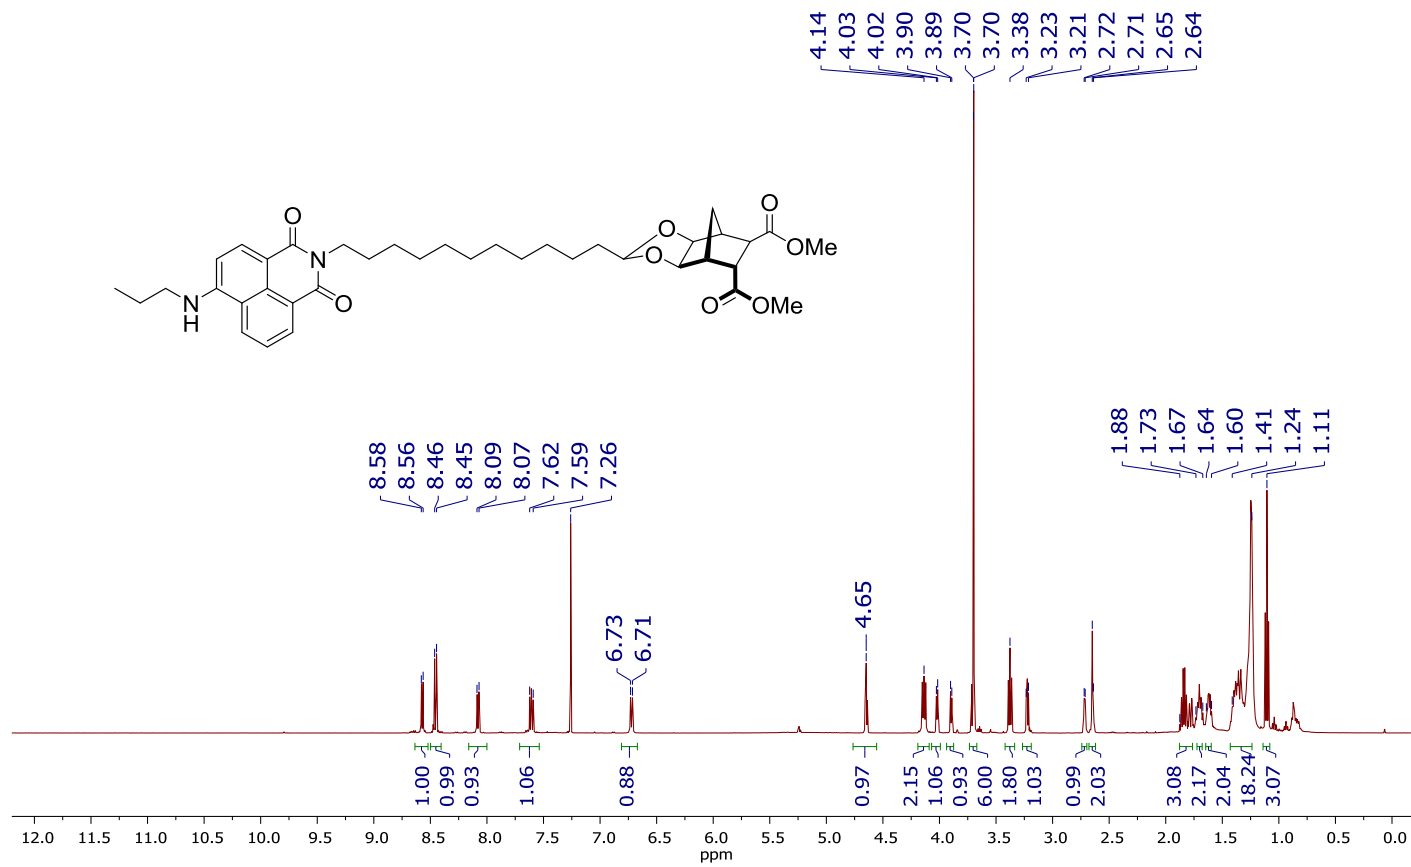

Figure S27:  $^1\text{H}$  NMR spectrum of **26** in CDCl<sub>3</sub>.

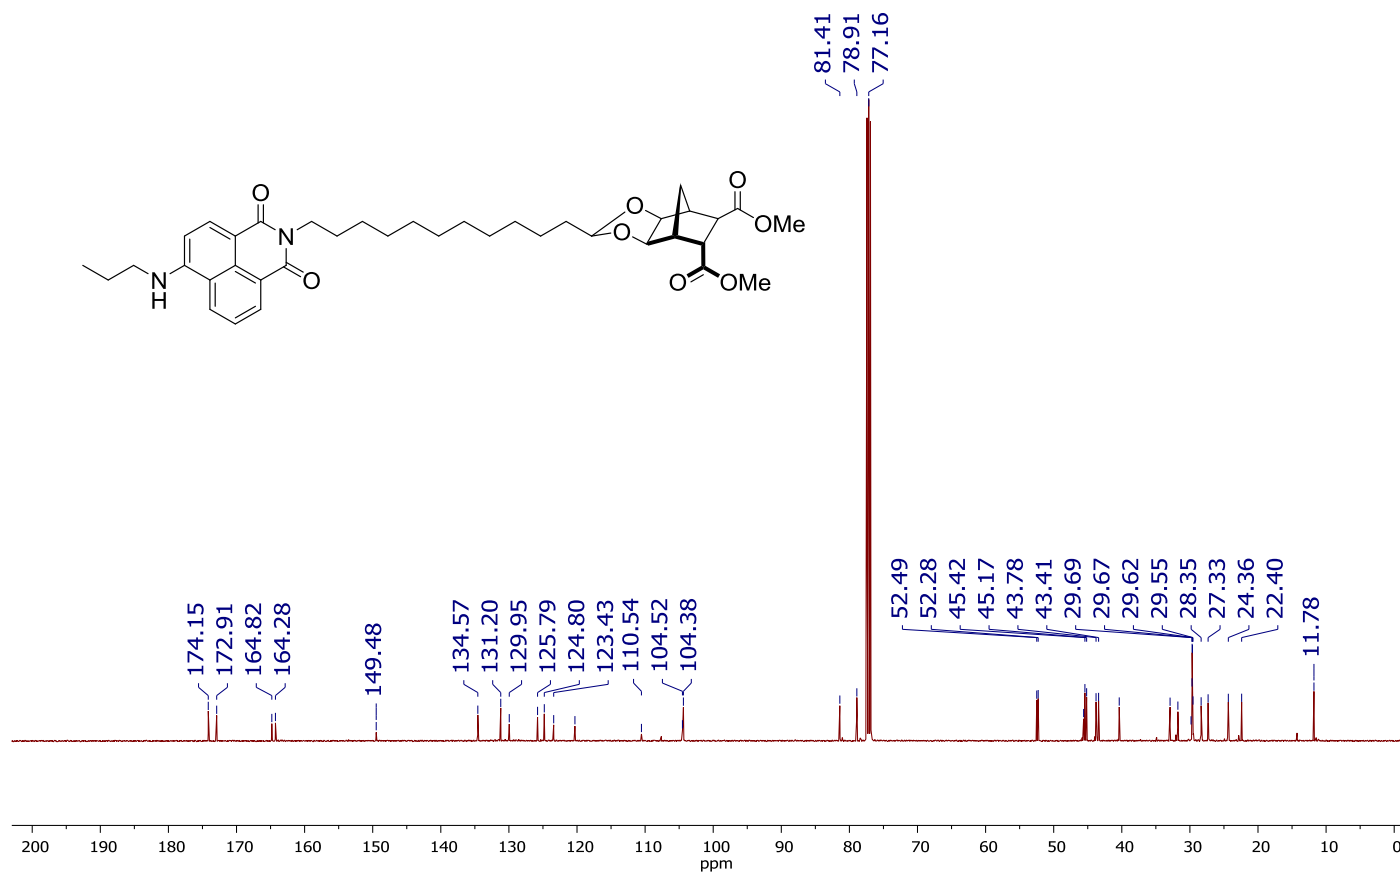

**Figure S28:**  $^{13}\text{C}$  NMR spectrum of **26** in  $\text{CDCl}_3$ .

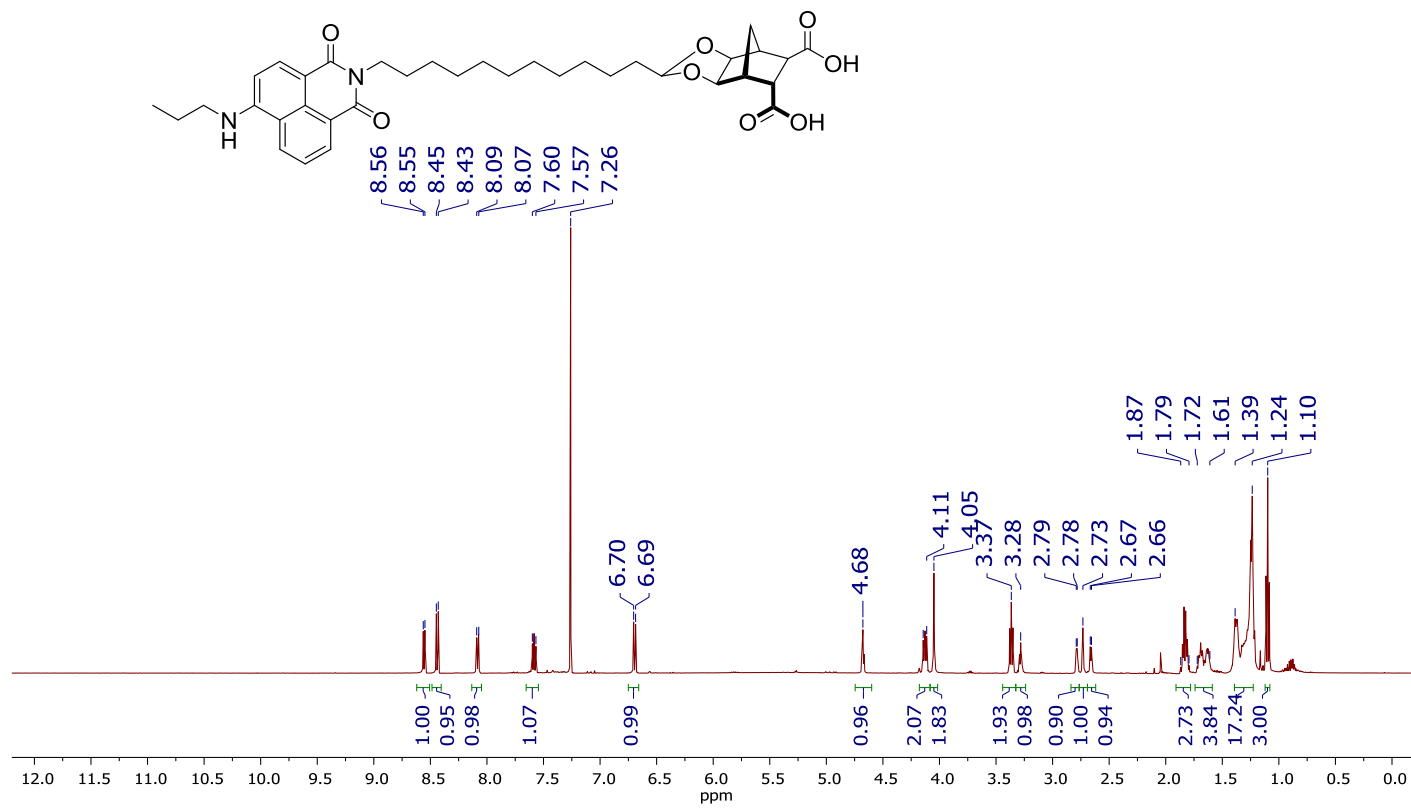

Figure S29:  $^1\text{H NMR}$  spectrum of **27** in  $\text{CDCl}_3$ .

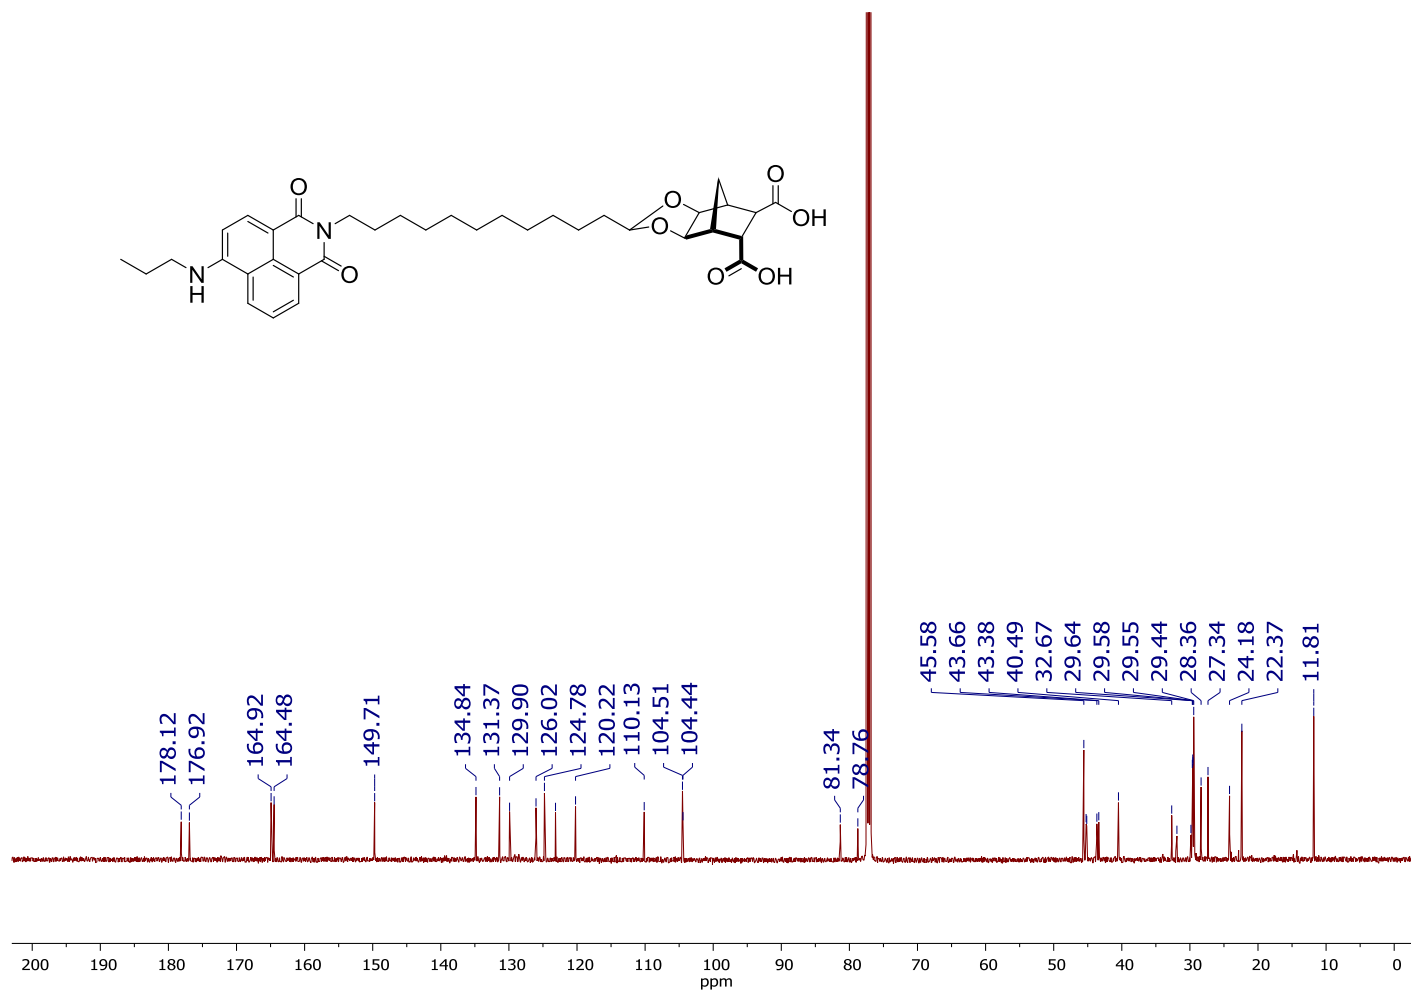

**Figure S30:** <sup>13</sup>C NMR spectrum of **27** in CDCl<sub>3</sub>.

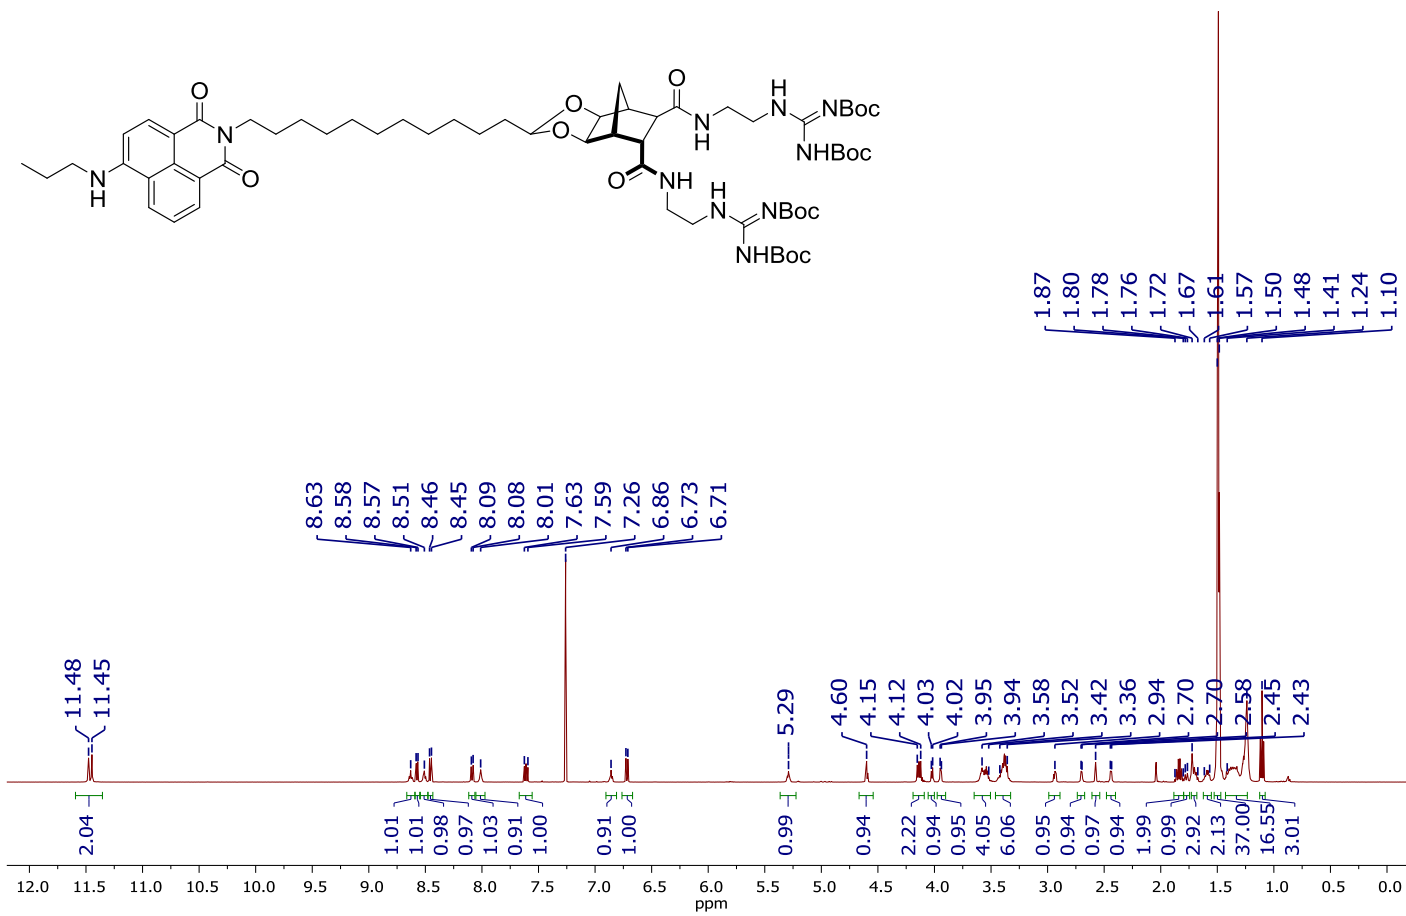

Figure S31:  $^1\text{H}$  NMR spectrum of **28** in  $\text{CDCl}_3$ .

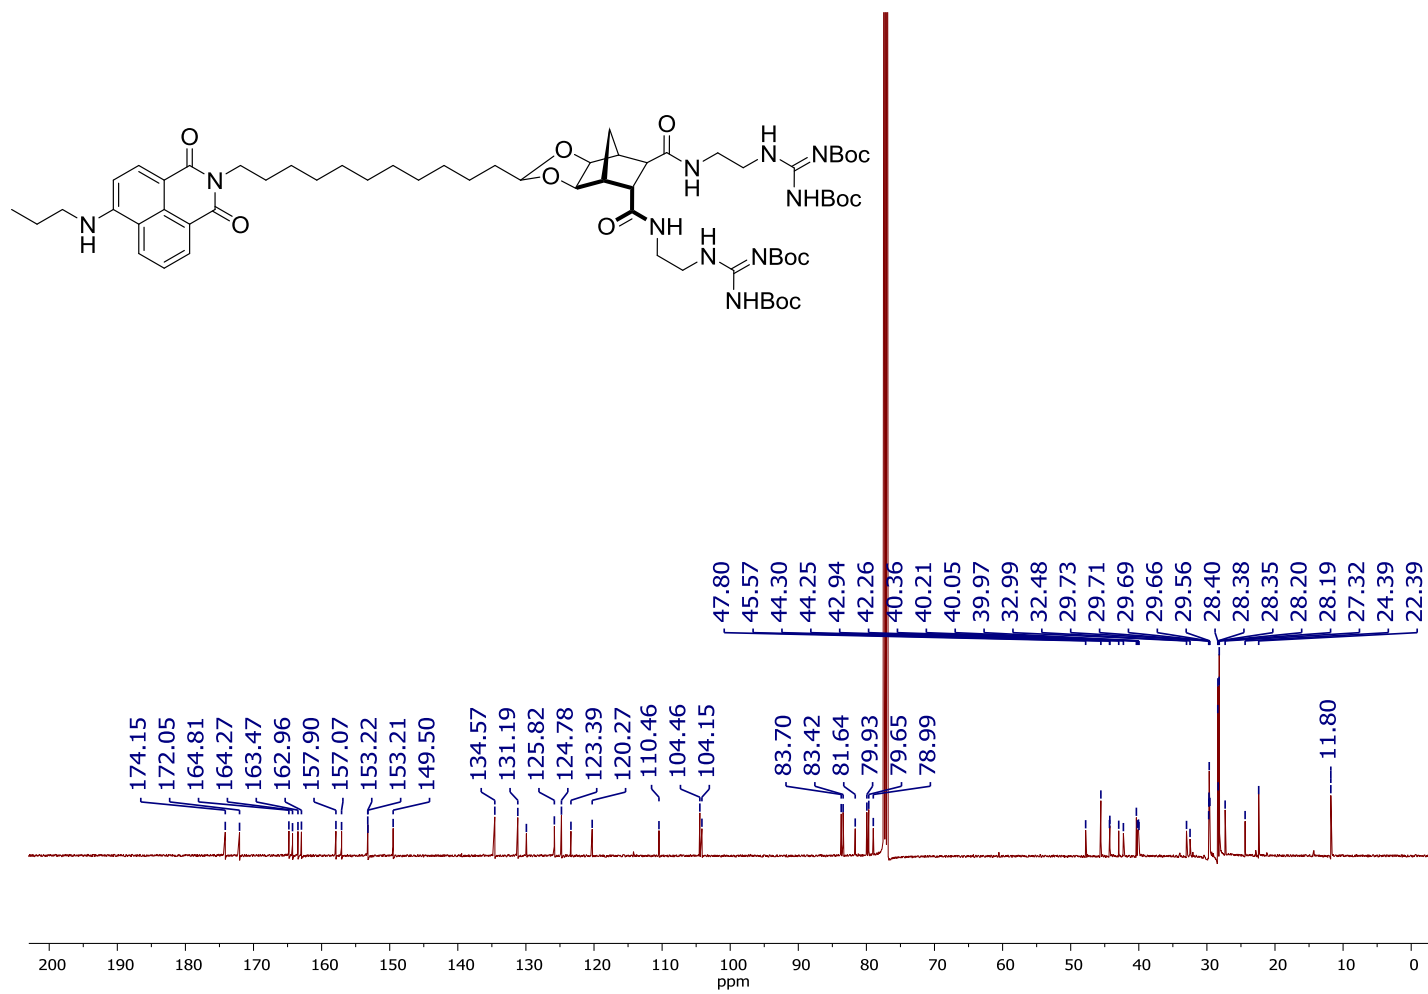

Figure S32:  $^{13}\text{C}$  NMR spectrum of **28** in  $\text{CDCl}_3$ .

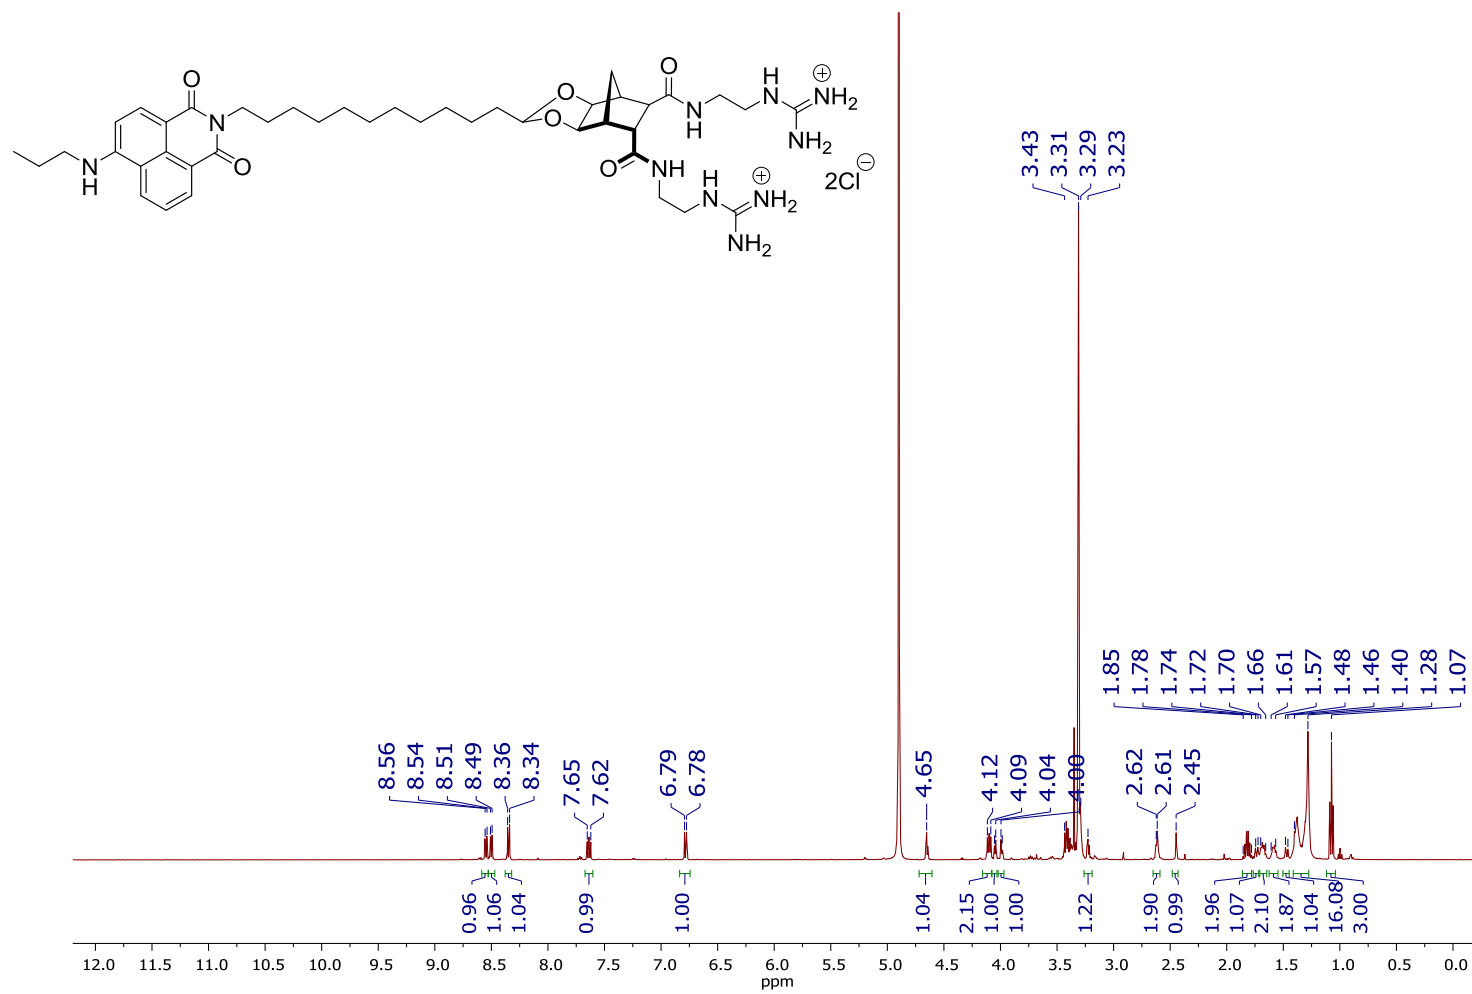

**Figure S33:** <sup>1</sup>H NMR spectrum of **29** in CD<sub>3</sub>OD.

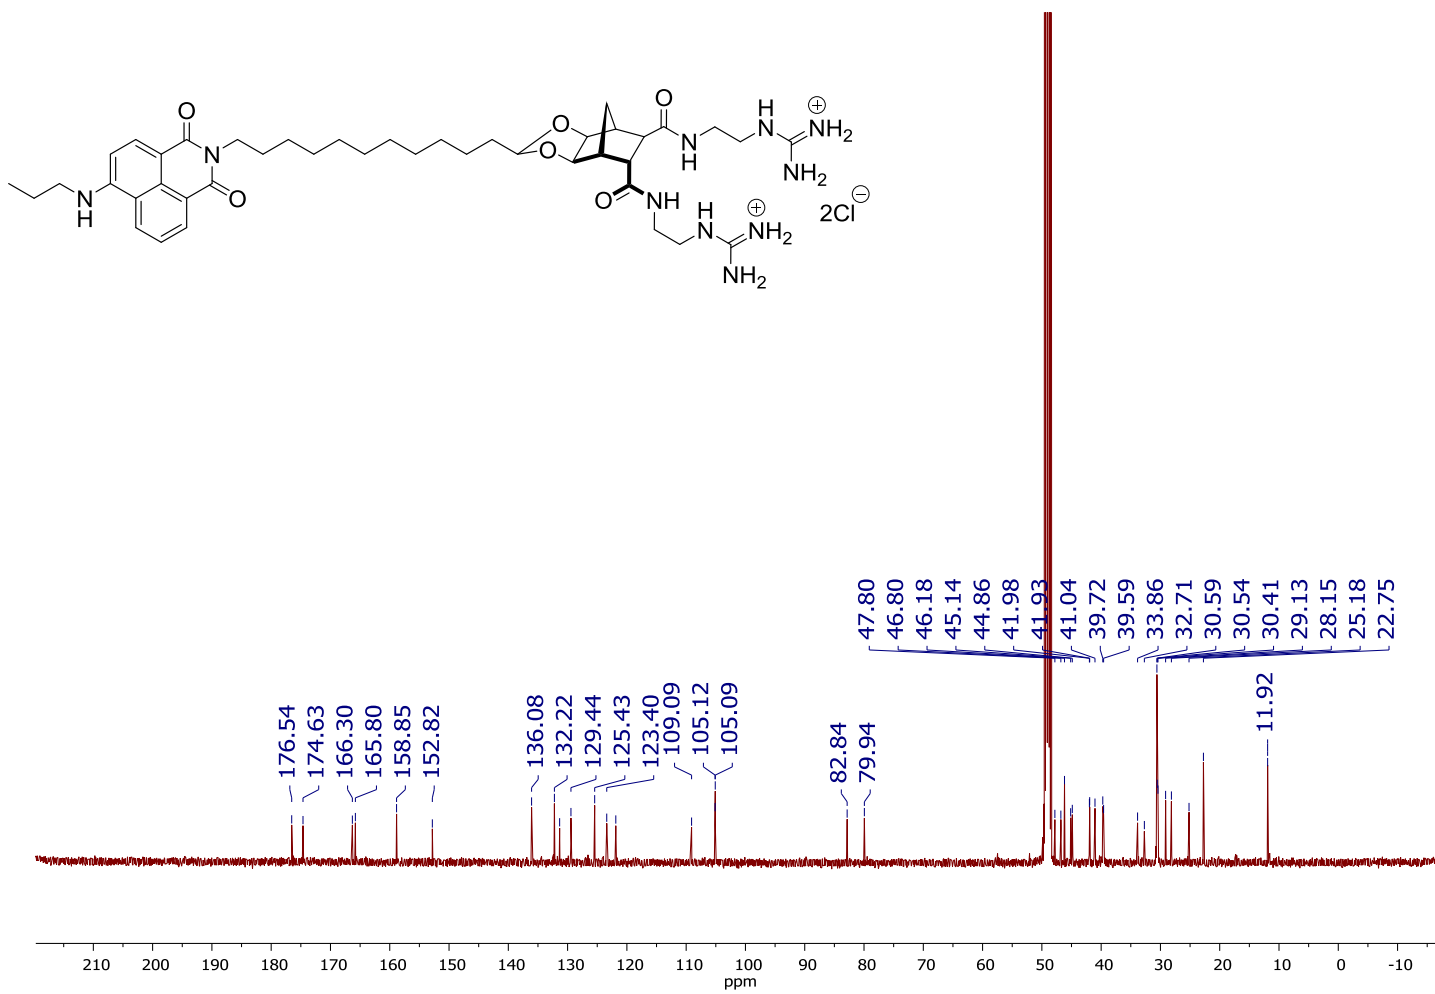

**Figure S34:** <sup>13</sup>C NMR spectrum of **29** in CD<sub>3</sub>OD.



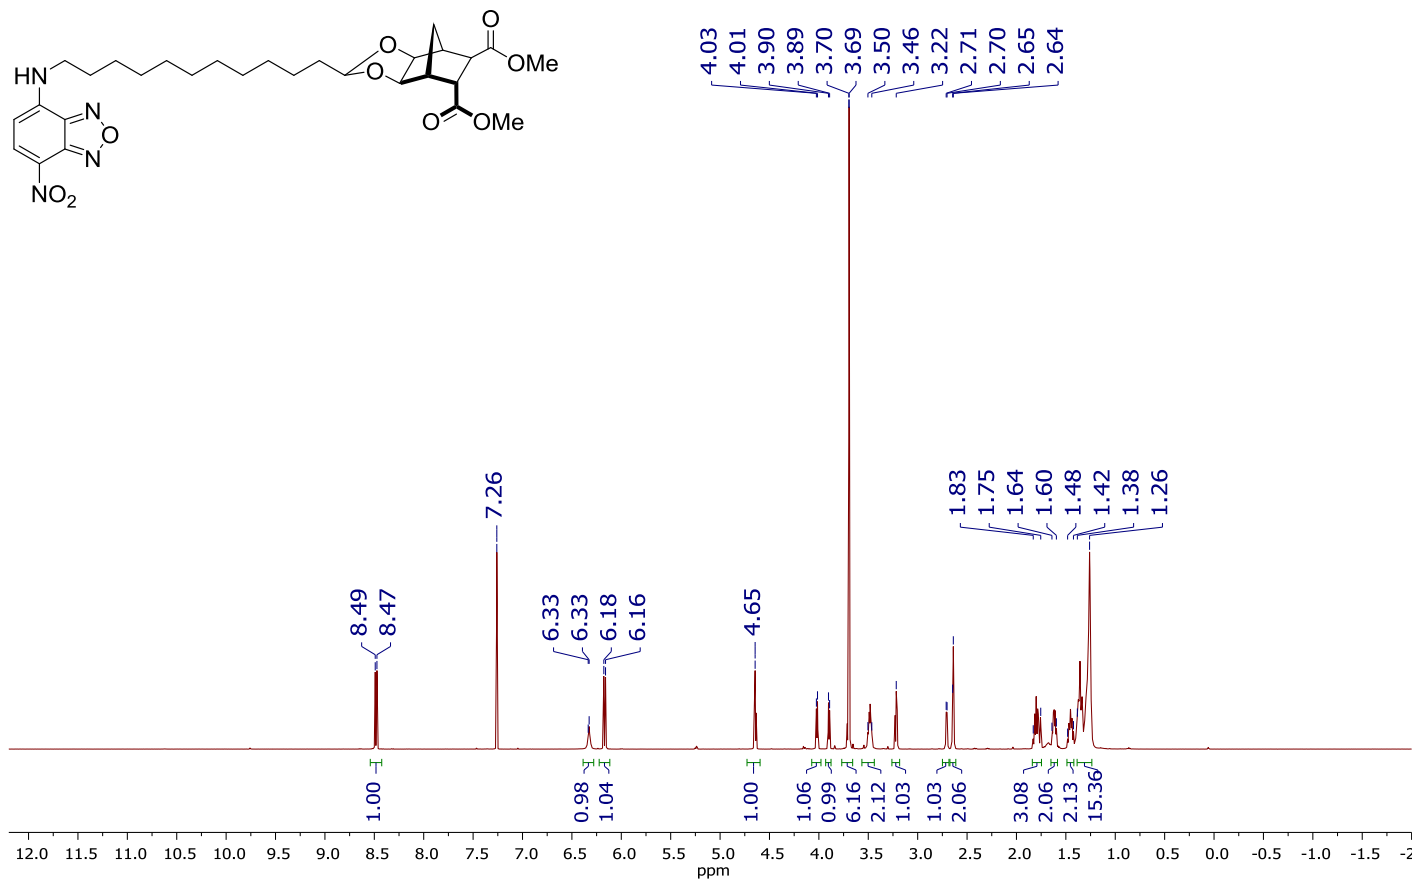

Figure S35:  $^1\text{H NMR}$  spectrum of **31** in  $\text{CDCl}_3$ .

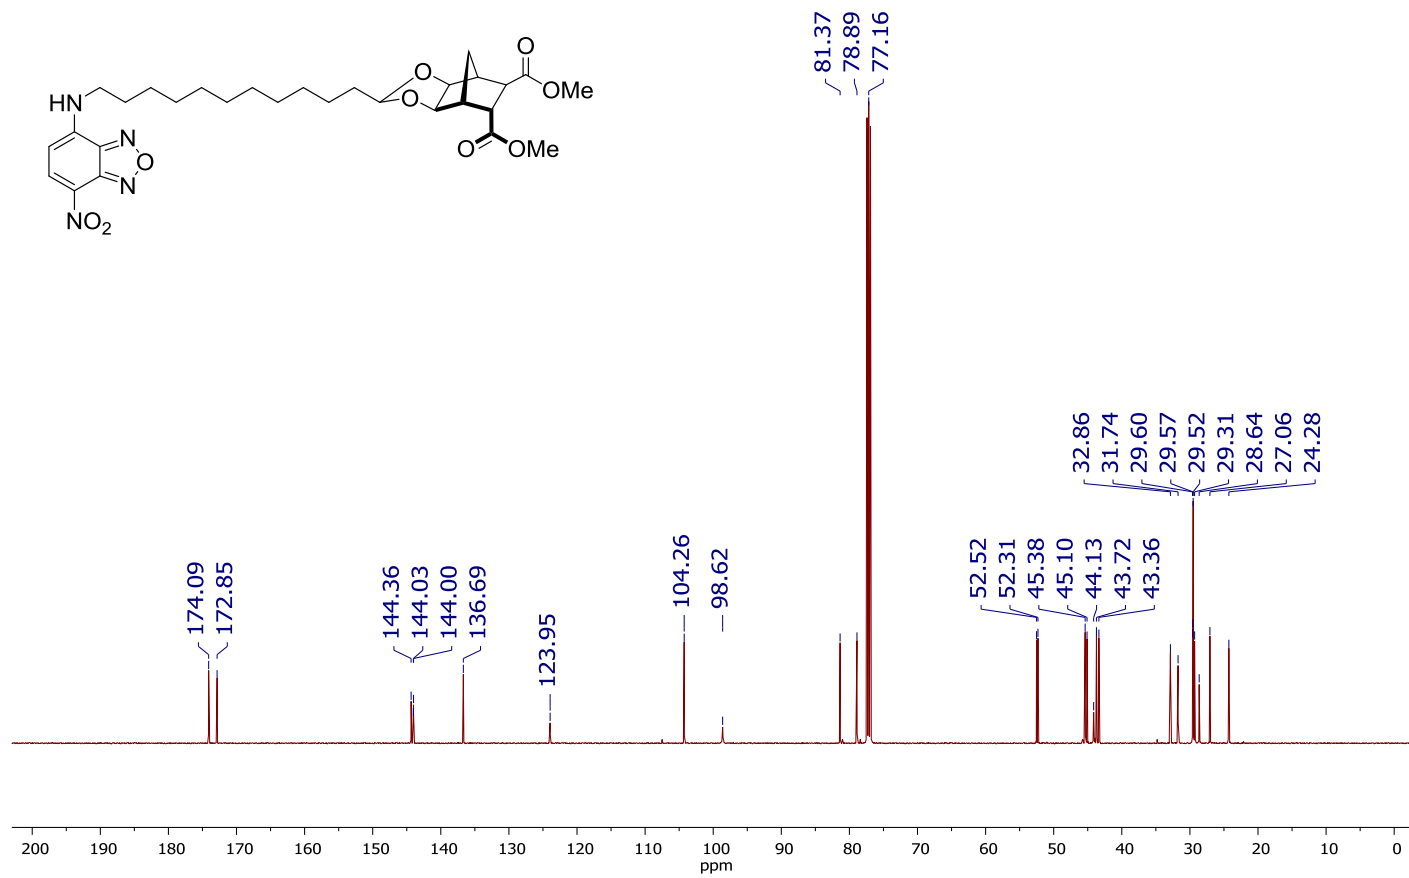

**Figure S36:**  $^{13}\text{C}$  NMR spectrum of **31** in  $\text{CDCl}_3$ .

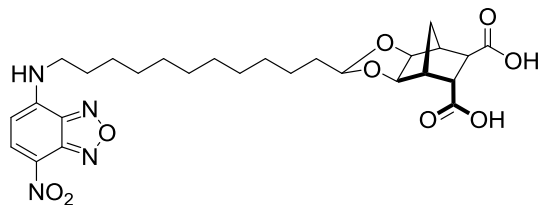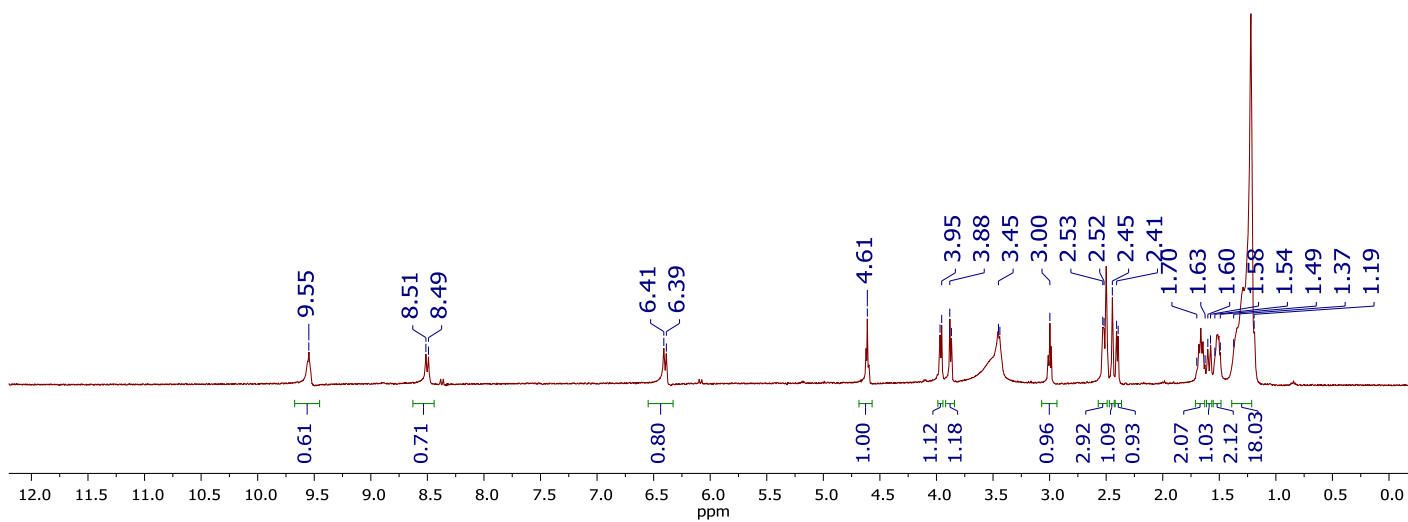

Figure S37:  $^1\text{H}$  NMR spectrum of **32** in  $\text{DMSO-}d_6$ .

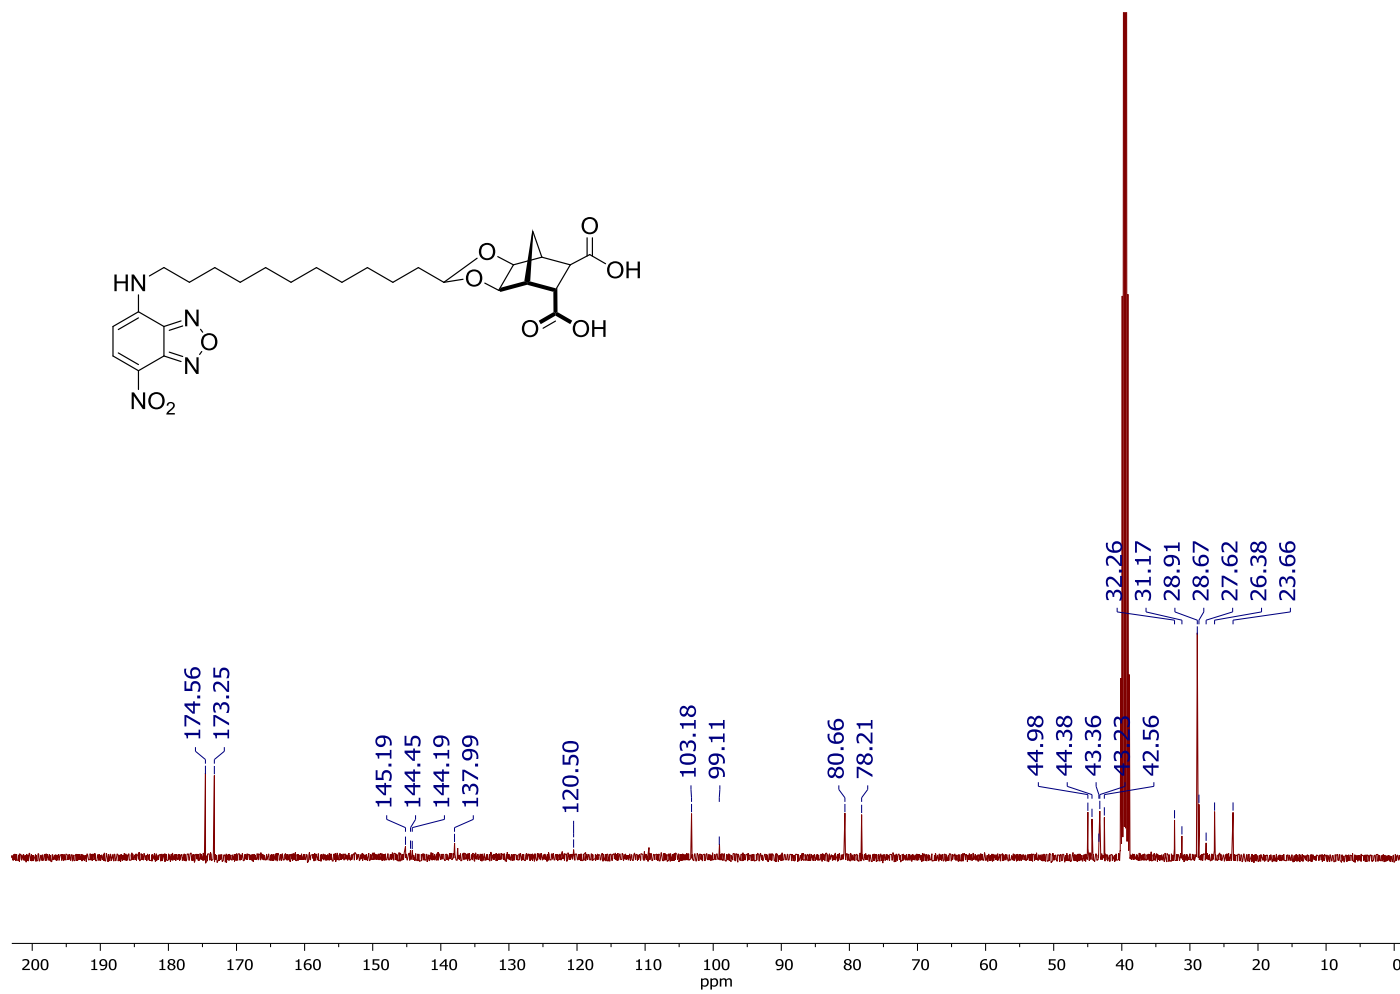

**Figure S38:**  $^{13}\text{C}$  NMR spectrum of **32** in  $\text{DMSO-}d_6$ .

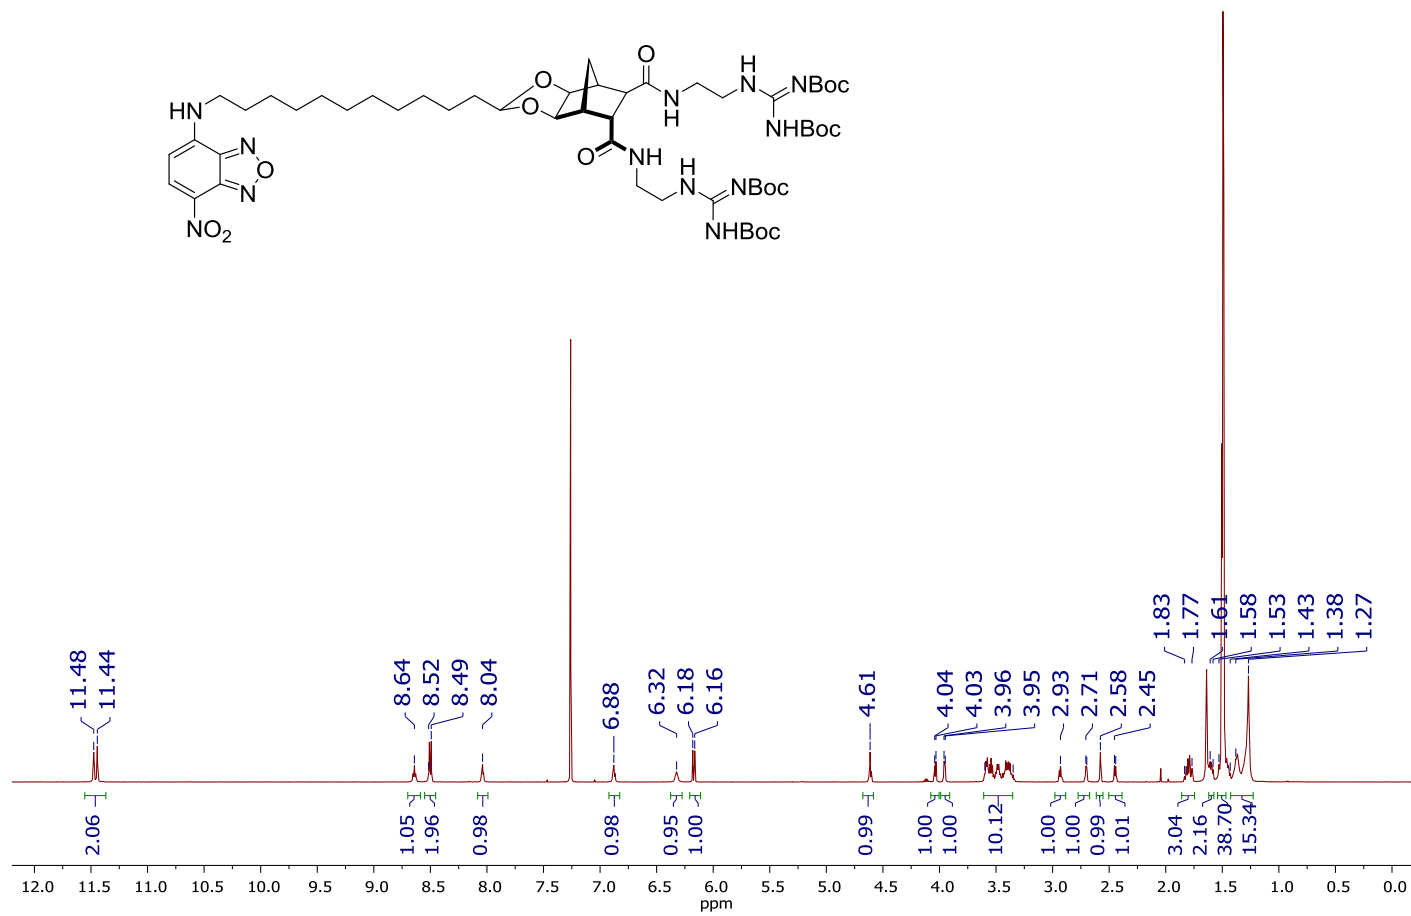

Figure S39: <sup>1</sup>H NMR spectrum of **33** in CDCl<sub>3</sub>.

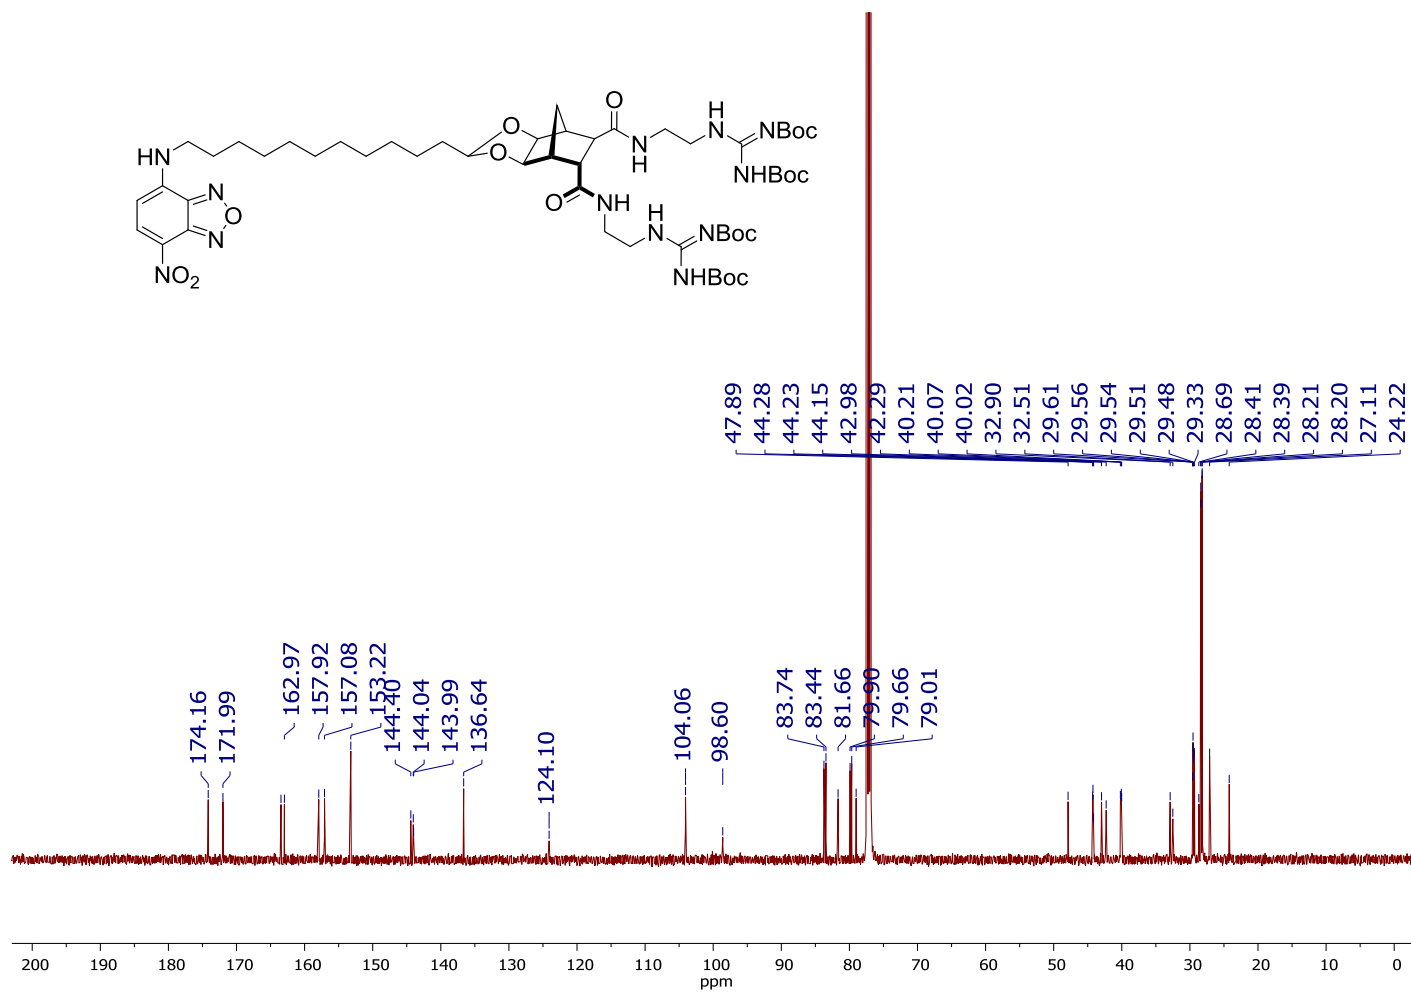

Figure S40: <sup>13</sup>C NMR spectrum of **33** in CDCl<sub>3</sub>.

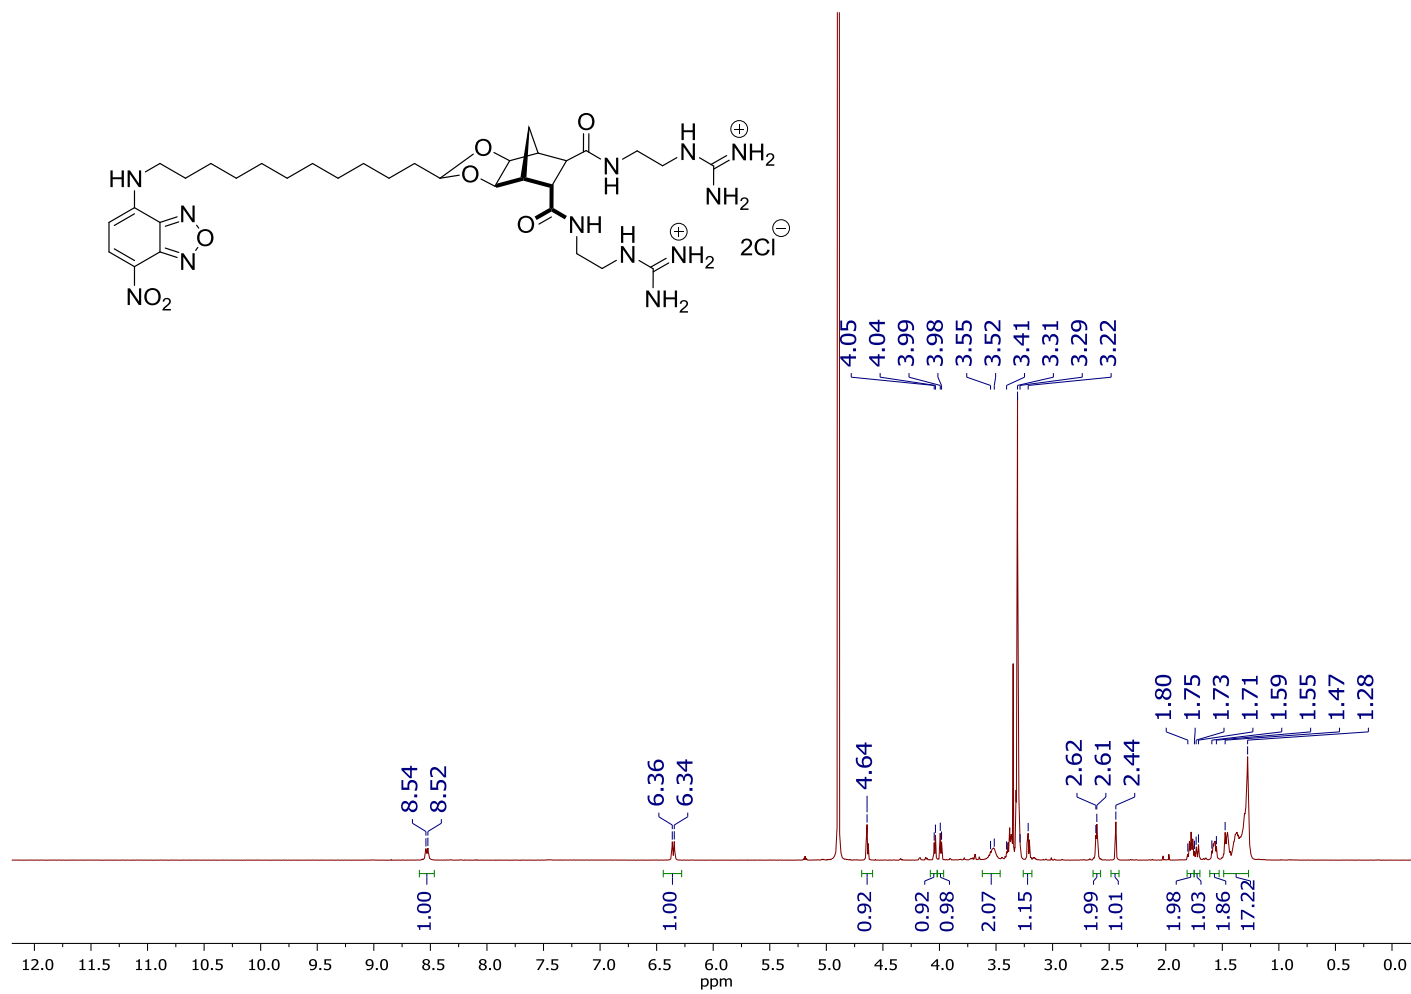

**Figure S41:** <sup>1</sup>H NMR spectrum of **34** in CD<sub>3</sub>OD.

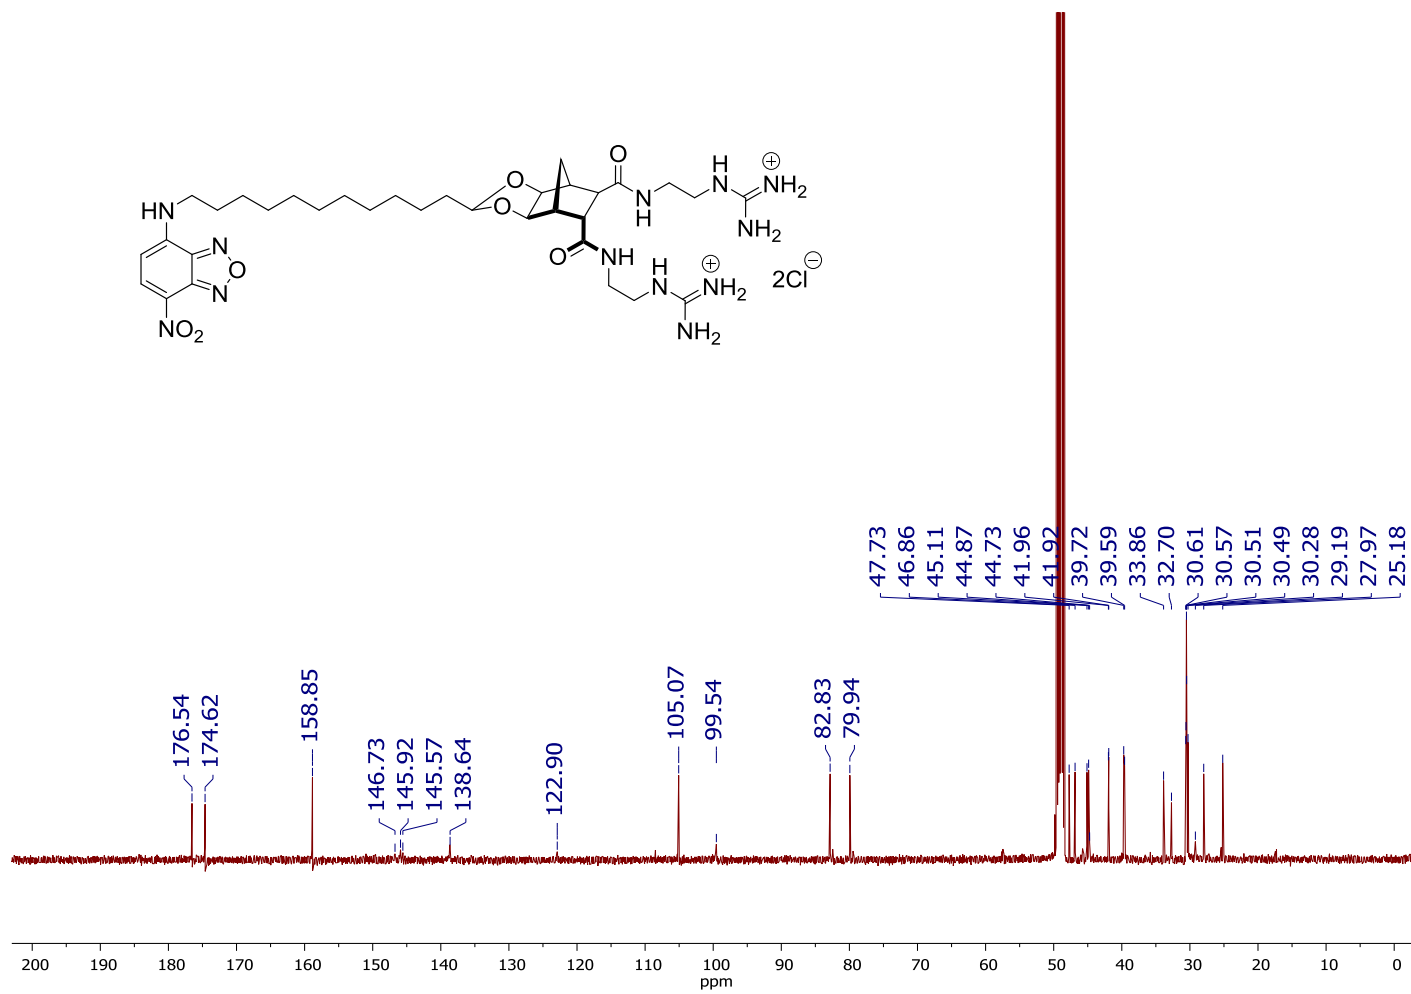

**Figure S42:**  $^{13}\text{C}$  NMR spectrum of **34** in  $\text{CD}_3\text{OD}$ .



## Photophysical Properties

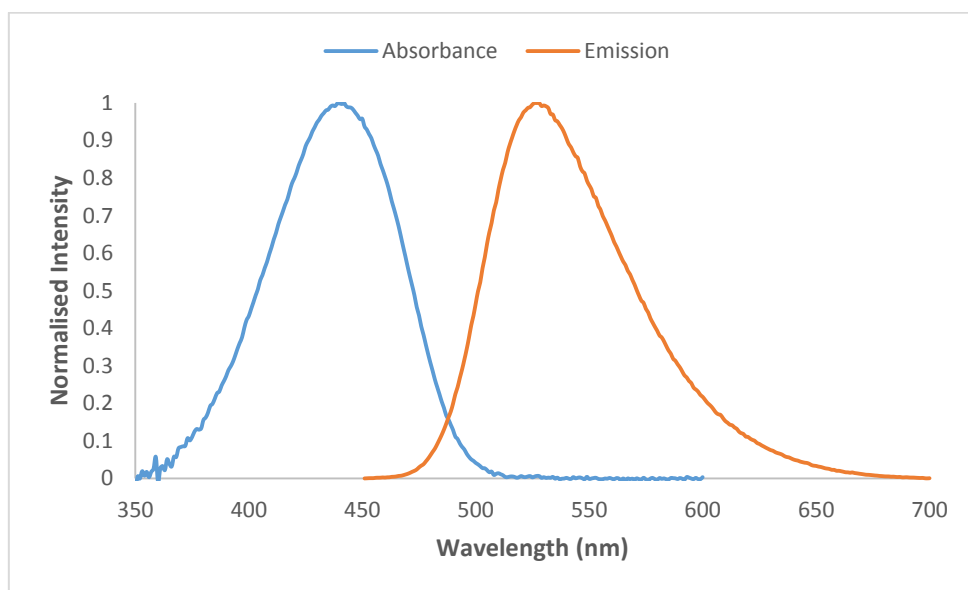

**Figure S43:** Normalised absorption and emission spectra of naphthalimide **28** in DMSO;  $\lambda_{\text{ex}} = 442$  nm,  $\lambda_{\text{em}} = 526$  nm and  $\phi_f = 0.89$ .

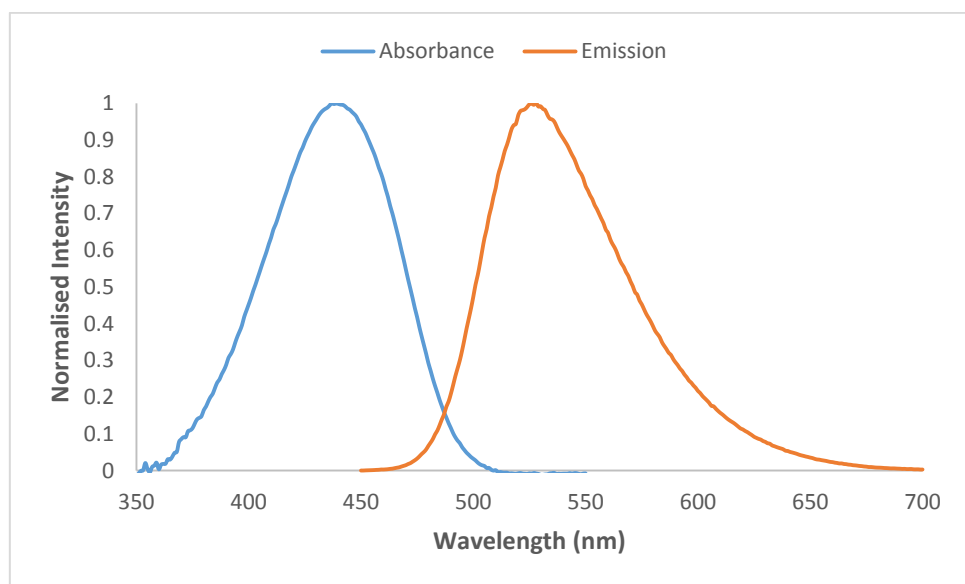

**Figure S44:** Normalised absorption and emission spectra of naphthalimide **29** in DMSO;  $\lambda_{\text{ex}} = 437$  nm,  $\lambda_{\text{em}} = 528$  nm and  $\phi_f = 0.88$ .

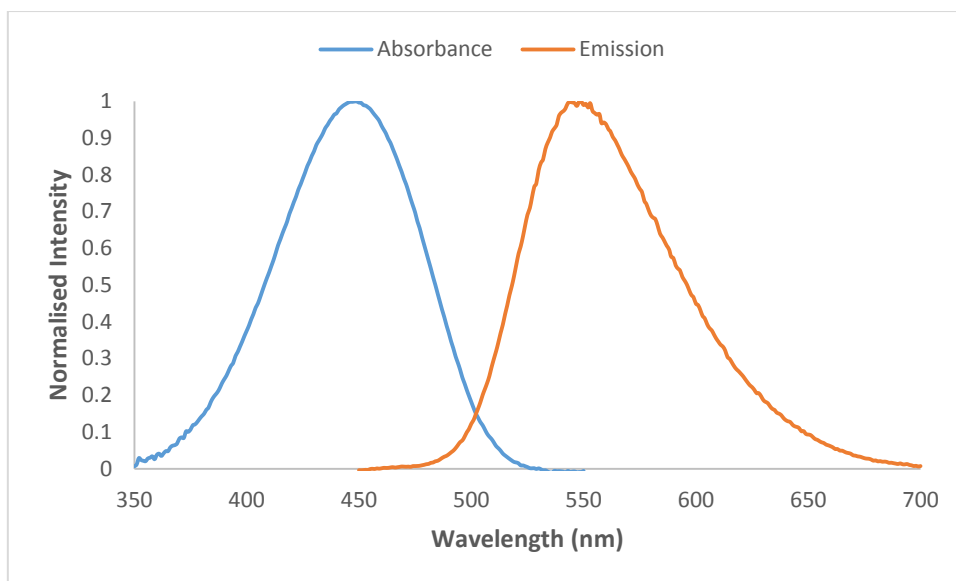

**Figure S45:** Normalised absorption and emission spectra of naphthalimide **29** in H<sub>2</sub>O;  $\lambda_{\text{ex}} = 449$  nm,  $\lambda_{\text{em}} = 549$  nm and  $\phi_f = 0.16$ .

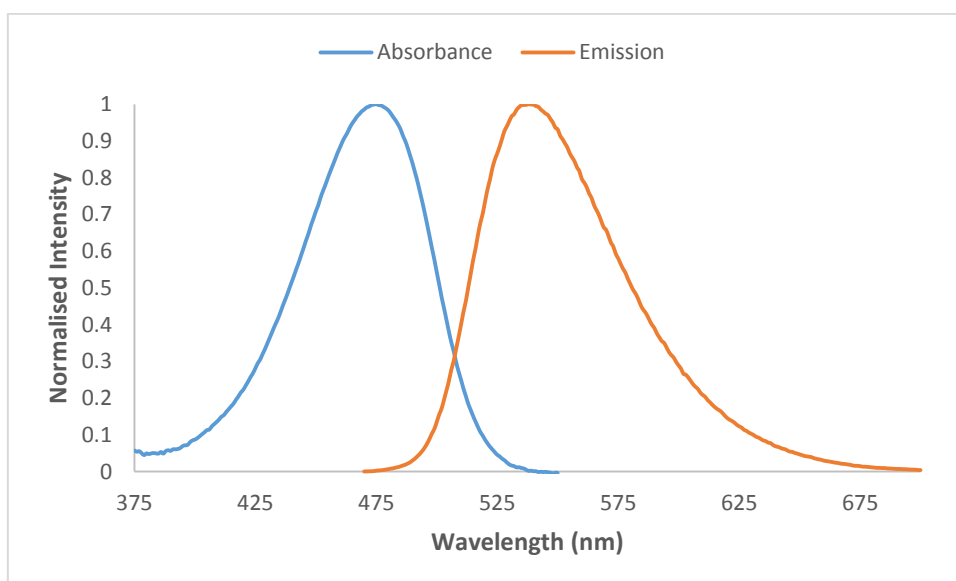

**Figure S46:** Normalised absorption and emission spectra of NBD **33** in DMSO;  $\lambda_{\text{ex}} = 475$  nm,  $\lambda_{\text{em}} = 538$  nm and  $\phi_f = 0.55$ .

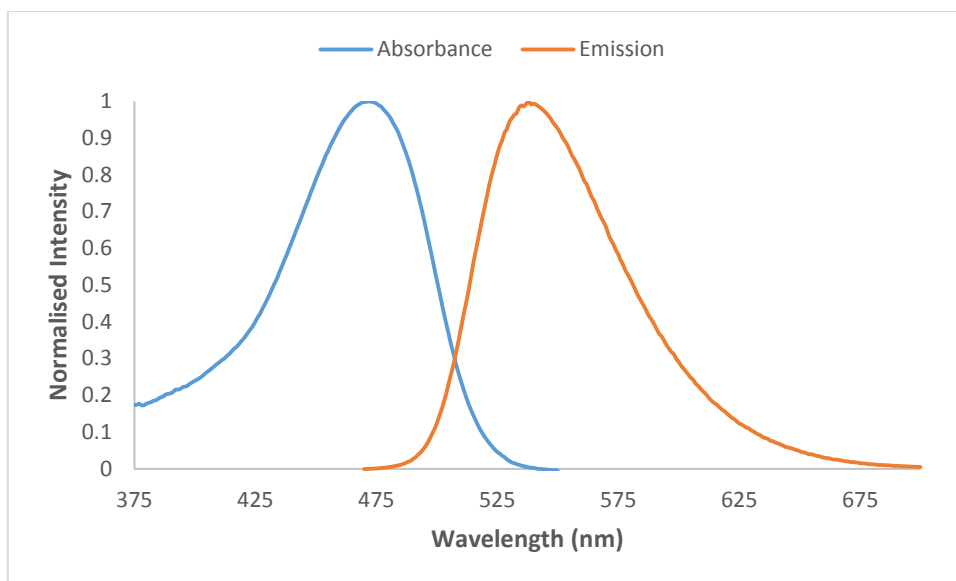

**Figure S47:** Normalised absorption and emission spectra of NBD **34** in DMSO;  $\lambda_{\text{ex}} = 472$  nm,  $\lambda_{\text{em}} = 538$  nm and  $\phi_f = 0.55$ .

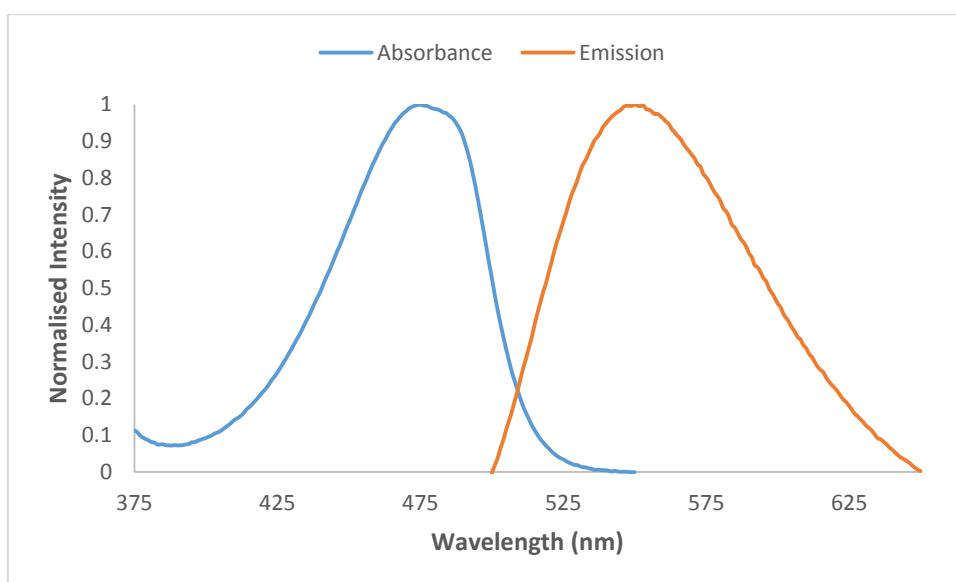

**Figure S48:** Normalised absorption and emission spectra of NBD **34** in H<sub>2</sub>O;  $\lambda_{\text{ex}} = 475$  nm,  $\lambda_{\text{em}} = 550$  nm and  $\phi_f = 0.02$ .

**Table S1:** Microbial strains used for Minimum Inhibitory Concentration (MIC) and disk diffusion (DD) assay

| Organism                             | Strain      | Strain description                                     | Assay  |
|--------------------------------------|-------------|--------------------------------------------------------|--------|
| <i>Escherichia coli</i>              | ATCC 25922  | FDA control strain Seattle<br>1946                     | MIC    |
| <i>Klebsiella pneumoniae</i>         | ATCC 13883  | Control strain                                         | DD     |
| <i>Klebsiella pneumoniae</i>         | ATCC 700603 | Multi-drug resistant                                   | MIC    |
| <i>Acinetobacter baumannii</i>       | ATCC 19606  | Type strain                                            | MIC/DD |
| <i>Pseudomonas aeruginosa</i>        | ATCC 27853  | Type strain                                            | MIC/DD |
| <i>Staphylococcus aureus</i>         | ATCC 43300  | MRSA (methicillin resistant<br><i>S. aureus</i> )      | MIC/DD |
| <i>Enterococcus faecium</i>          | ATCC 700221 | VRE (vancomycin resistant<br>Enterococcus)             | DD     |
| <i>Streptococcus pneumoniae</i>      | ATCC 700677 | Multi-drug resistant                                   | MIC    |
| <i>Staphylococcus aureus</i>         | NRS 17      | GISA (glycopeptide-<br>intermediate <i>S. aureus</i> ) | MIC    |
| <i>Staphylococcus aureus</i>         | NRS 1       | GISA, MRSA                                             | MIC    |
| <i>Staphylococcus aureus</i>         | VRS 10      | Vancomycin Resistant <i>S.</i><br><i>aureus</i>        | MIC    |
| <i>Candida albicans</i>              | ATCC 90028  | CLSI reference                                         | MIC    |
| <i>Cryptococci neoformans</i><br>H99 | ATCC 208821 | Type strain                                            | MIC    |

## Disk Diffusion Results

**Table S2:** ZOI as measured (in mm) using disk diffusion assay<sup>a</sup>

|                         | <i>A. baumannii</i><br>ATCC 19606 | <i>P. aeruginosa</i><br>ATCC<br>27853 | <i>K. pneumoniae</i><br>ATCC<br>13883 | <i>S. aureus</i><br>MRSA<br>ATCC<br>43300 | <i>E. faecium</i><br>VRE<br>ATCC 700221 |
|-------------------------|-----------------------------------|---------------------------------------|---------------------------------------|-------------------------------------------|-----------------------------------------|
| <b>Compound</b>         |                                   |                                       |                                       |                                           |                                         |
| <b>7</b>                | 10                                | 13                                    | 15                                    | 17                                        | 18                                      |
| <b>21</b>               | 12                                | 12                                    | 14.5                                  | 14                                        | -                                       |
| <b>29</b>               | -                                 | -                                     | -                                     | -                                         | -                                       |
| <b>34</b>               | -                                 | 9                                     | 8.5                                   | 9                                         | -                                       |
| <i>COL</i> <sup>b</sup> | 20                                | 19                                    | 20                                    | -                                         | -                                       |

<sup>a</sup> Measured after incubation of disk (6 mm diameter, 50 µg/disk) at 37 °C for 20 h.

<sup>b</sup> Tested at 10 µg/disk.

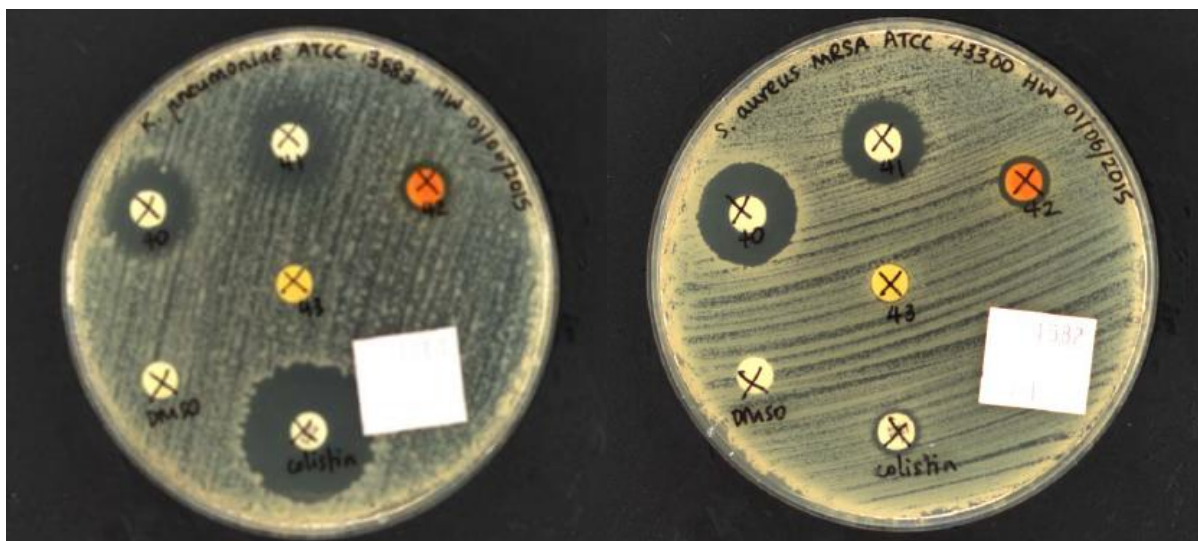

**Figure S49:** Antibacterial activity against *K. pneumoniae* (LHS) and MRSA (RHS) at 50 µg/disk. Compounds are numbered as such; **29** (43), **34** (42), **7** (40) and **21** (41). Colistin and DMSO were used as controls and are labelled accordingly.

## Molecular Dynamics Simulation Images

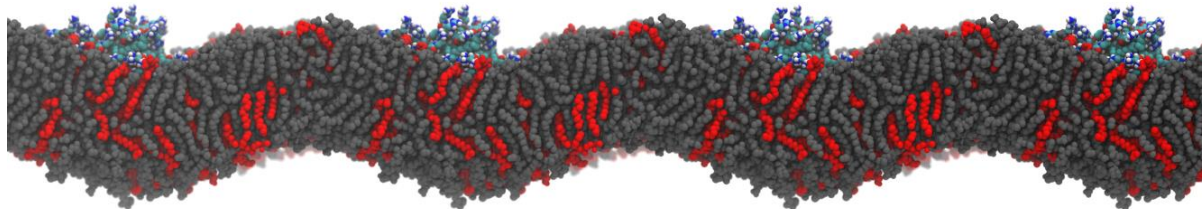

**Figure S50:** A snapshot of the curvature in the 2<sup>nd</sup> replicate of the simulation of compound **2** interacting with the membrane. Colours as per Figure 3 in the main text. Periodic images of the simulation system have been included to emphasise the curvature of the membrane.

A video depicting compound **2**<sub>28</sub> interacting with the model Gram-negative membrane can be made available upon request.

## Fluorescence Microscopy

A video depicting a 3D-representation of naphthalimide **29** in *E. coli* cells can be made available upon request.

## Anti-fungal Activity

**Table S3: MIC values (µg/mL)**

| Fungal strain                   | <b>7</b> | <b>29</b>   | <b>34</b> | FLU <sup>a</sup> |
|---------------------------------|----------|-------------|-----------|------------------|
| <i>C. albicans</i> ATCC 90028   | 128      | 128         | <b>16</b> | 1                |
| <i>C. neoformans</i> ATCC 20881 | <b>2</b> | <b>0.25</b> | <b>4</b>  | 8                |

<sup>a</sup>FLU = Fluconazole

The antifungal properties were evaluated for compounds **7**, **29** and **34** and excellent activity was observed against *Cryptococcus neoformans* for all compounds (MIC = 2, 0.25 and 4 µg/mL respectively); a result comparable to the activity range displayed by commercially available Fluconazole.

## References

- [1] H.E. Gottlieb, V. Kotlyar, A. Nudelman, NMR chemical shifts of common laboratory solvents as trace impurities, *J. Org. Chem.*, 62 (1997) 7512-7515.
- [2] G. Moss, Extension and revision of the von Baeyer system for naming polycyclic compounds (including bicyclic compounds), *Pure Appl. Chem.*, 71 (1999) 513-529.
- [3] G. Radau, S. Schermuly, A. Fritsche, New cyanopeptide-derived low molecular weight inhibitors of trypsin-like serine proteases, *Arch. Pharm.*, 336 (2003) 300-309.
- [4] A. Kraus, P. Ghorai, T. Birnkammer, D. Schnell, S. Elz, R. Seifert, S. Dove, G. Bernhardt, A. Buschauer, NG-Acylated aminothiazolylpropylguanidines as potent and selective histamine H2 receptor agonists, *ChemMedChem*, 4 (2009) 232-240.
- [5] C. Liu, W. Guo, X. Shi, M.A. Kaium, X. Gu, Y.Z. Zhu, Leonurine-cysteine analog conjugates as a new class of multifunctional anti-myocardial ischemia agent, *Euro. J. Med. Chem.*, 46 (2011) 3996-4009.
- [6] S.M. Hickey, T.D. Ashton, S.K. Khosa, F.M. Pfeffer, An optimised synthesis of 2-[2, 3-Bis (tert-butoxycarbonyl) guanidino] ethylamine, *Synlett*, 23 (2012) 1779-1782.
- [7] L.D. Van Vliet, T. Ellis, P.J. Foley, L. Liu, F.M. Pfeffer, R.A. Russell, R.N. Warrener, F. Hollfelder, M.J. Waring, Molecular recognition of DNA by rigid [*n*]-polynorbornane-derived bifunctional intercalators: synthesis and evaluation of their binding properties, *J. Med. Chem.*, 50 (2007) 2326-2340.
- [8] L. He, H.-S. Byun, R. Bittman, A stereocontrolled, efficient synthetic route to bioactive sphingolipids: Synthesis of phytosphingosine and phytoceramides from unsaturated ester precursors *via* cyclic sulfate intermediates, *J. Org. Chem.*, 65 (2000) 7618-7626.
- [9] C.-X. Miao, L.-N. He, J.-L. Wang, F. Wu, Self-neutralizing *in situ* acidic CO<sub>2</sub>/H<sub>2</sub>O system for aerobic oxidation of alcohols catalyzed by TEMPO functionalized imidazolium salt/NaNO<sub>2</sub>, *J. Org. Chem.*, 75 (2009) 257-260.
- [10] C.C. Forbes, K.M. DiVittorio, B.D. Smith, Bolaamphiphiles promote phospholipid translocation across vesicle membranes, *J. Am. Chem. Soc.*, 128 (2006) 9211-9218.
- [11] C.M. Jakobsen, S.R. Denmeade, J.T. Isaacs, A. Gady, C.E. Olsen, S.B. Christensen, Design, synthesis, and pharmacological evaluation of thapsigargin analogues for targeting apoptosis to prostatic cancer cells, *J. Med. Chem.*, 44 (2001) 4696-4703.
- [12] M.M. Flook, J. Börner, S.M. Kilyanek, L.C.H. Gerber, R.R. Schrock, Five-coordinate rearrangements of metallacyclobutane intermediates during ring-opening metathesis polymerization of 2,3-dicarboalkoxynorbornenes by molybdenum and tungsten monoalkoxide pyrrolide initiators, *Organometallics*, 31 (2012) 6231-6243.
- [13] M. Dejmek, H. Hrebabecky, M. Sala, M. Dracinsky, R. Nencka, Microwave-assisted solvent-free Diels-Alder reaction-a fast and simple route to various 5, 6-substituted norbornenes and polychlorinated norbornenes, *Synthesis*, (2011) 4077-4083.
- [14] S.M. Hickey, S.K. Tripcony, R. Li, R.J. Williams, F.M. Pfeffer, Organogelators based on the norbornane scaffold, *Supramol. Chem.*, 27 (2015) 425-435.
- [15] L.C. Henderson, J. Li, R.L. Nation, T. Velkov, F.M. Pfeffer, Developing an anion host for lipid A binding and antibacterial activity, *Chem. Commun.*, 46 (2010) 3197-3199.
- [16] T.J. Donohoe, A. Jahanshahi, M.J. Tucker, F.L. Bhatti, I.A. Roslan, M. Kabeshov, G. Wrigley, Exerting control over the acyloin reaction, *Chem. Commun.*, 47 (2011) 5849-5851.
- [17] S.M. Hickey, T.D. Ashton, S.K. Khosa, R.N. Robson, J.M. White, J. Li, R.L. Nation, H.Y. Yu, A.G. Elliott, M.S. Butler, J.X. Huang, M.A. Cooper, F.M. Pfeffer, Synthesis and evaluation of cationic norbornanes as peptidomimetic antibacterial agents, *Org. Biomol. Chem.*, 13 (2015) 6225-6241.
- [18] W. Xuan, R. Pan, Y. Cao, K. Liu, W. Wang, A fluorescent probe capable of detecting H<sub>2</sub>S at submicromolar concentrations in cells, *Chem. Commun.*, 48 (2012) 10669-10671.
- [19] K.N. Hearn, T.D. Nalder, R.P. Cox, H.D. Maynard, T.D.M. Bell, F.M. Pfeffer, T.D. Ashton, Modular synthesis of 4-aminocarbonyl substituted 1,8-naphthalimides and application in single molecule fluorescence detection, *Chem. Commun.*, 53 (2017) 12298-12301.
- [20] M.K. Buchanan, C.N. Needham, N.E. Neill, M.C. White, C.B. Kelly, K. Mastro-Kishton, L.M. Chauvigne-Hines, T.J. Goodwin, A.L. McIver, L.J. Bartolotti, A.R. Frampton, A.J. Bourdelais, S. Varadarajan, Glycoconjugated site-selective DNA-methylating agent targeting glucose transporters on glioma cells, *Biochemistry*, 56 (2017) 421-440.
